# Supplementary material
Source: publisher figshare collection journal article supplement (https://acs.figshare.com/ndownloader/files/4614880)

## SUPPORTING INFORMATION

Asymmetric synthesis of (+)-isofebrifugine and (–)-sedacryptine  
from a common chiral non-racemic building block.

Andrew G. H. Wee\* and Gao-Jun Fan  
Department of Chemistry and Biochemistry  
University of Regina, Regina  
Saskatchewan, Canada, S4S 0A2

|                                                                                                                      | Pages       |
|----------------------------------------------------------------------------------------------------------------------|-------------|
| Experimental procedures for compounds <b>10–14</b> , (+)- <b>1</b> , <b>16–21</b> ,<br>(–)- <b>2</b> , and <b>22</b> | S-2 – S-10  |
| Spectral data for compounds <b>10–14</b> , (+)- <b>1</b> , <b>16</b> , <b>18a,b</b> , <b>19–22</b> , (–)- <b>2</b> . | S-11 – S-38 |
| 1D NOEDY experiments on cyclic carbamate <b>22</b>                                                                   | S-39 – S-41 |

## Preparation of compound **10**

To an suspension of  $\text{MePh}_3\text{P}^+ \text{Br}^-$  (0.80 g, 2.24 mmol) in THF (8 mL) at 0 °C was added *n*-BuLi (1.5 M in hexane, 1.15 mL, 1.77 mmol) dropwise. After addition was complete, an orange solution was obtained. The reaction mixture was stirred at that 0 °C for 10 min, and then lactol **9** (219 mg, 0.88 mmol) in THF (2 mL) was added via cannula. The mixture was stirred at 0 °C for 30 min and then at rt for 3 h. Saturated aqueous  $\text{NH}_4\text{Cl}$  solution (6 mL) was then added and the organic layer was separated. The aqueous layer was re-extracted with EtOAc (x4). The combined organic layers were washed with brine, dried ( $\text{Na}_2\text{SO}_4$ ), filtered and evaporated under reduced pressure. The residue was purified by flash chromatography (1:1, then 2:3 v/v pet. ether:EtOAc and finally EtOAc) to give recovered lactol **9** (20 mg), and the target alkene alcohol (145 mg, 74%).

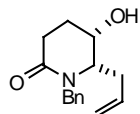

IR  $\nu_{\text{max}}$ : 3162–3587, 1613  $\text{cm}^{-1}$ ;  $^1\text{H}$  NMR ( $\text{CDCl}_3$ , 300 MHz),  $\delta$ : 7.10–7.40 (m, 5H), 5.70–5.82 (m, 1H), 5.30 (d, 1H,  $J = 15.1$  Hz), 5.07 (dd, 1H,  $J = 17.3, 1.4$  Hz), 5.02 (d, 1H,  $J = 10.4$  Hz), 3.80–3.92 (m, 2H), 3.31 (dd, 1H,  $J = 10.9, 5.9$ ), 2.25–2.65 (m, 4H), 1.75–1.95 (m, 2H);  $^{13}\text{C}$  NMR ( $\text{CDCl}_3$ , 75 MHz),  $\delta$ : 169.8, 137.1, 135.5, 128.6, 127.8, 127.3, 117.8, 67.0, 59.1, 48.3, 33.6, 28.5, 25.4; EI-HRMS calcd for  $\text{C}_{15}\text{H}_{20}\text{NO}_2$  ( $\text{MH}^+$ ) 246.1494, found 246.1495

A solution of the above alkene alcohol (130 mg, 0.53 mmol), MOM-Cl (80  $\mu\text{L}$ , 1.06 mmol),  $i\text{Pr}_2\text{NEt}$  (371  $\mu\text{L}$ , 2.12 mmol) and  $\text{Bu}_4\text{NI}$  (1.9 mg) in 1,2-dichloroethane was heated at reflux overnight. Upon cooling, the reaction was quenched by addition of 10 % aqueous  $\text{Na}_2\text{CO}_3$ . The reaction solution was washed with brine, dried ( $\text{Na}_2\text{SO}_4$ ) and evaporated under reduced pressure. The residue was purified by flash chromatography (2:1 and then 3:2 v/v pet. ether:EtOAc) to give MOM ether **10** (139 mg, 91%) as colorless oil.

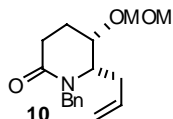

$[\alpha]_{\text{D}}^{22} = -72.5^\circ$  ( $c$  1.0,  $\text{CHCl}_3$ ); IR  $\nu_{\text{max}}$ : 1643, 1449, 1032  $\text{cm}^{-1}$ ;  $^1\text{H}$  NMR ( $\text{CDCl}_3$ , 300 MHz),  $\delta$ : 7.15–7.30 (m, 5H), 5.75–5.85 (m, 1H), 5.40 (d, 1H,  $J = 15.1$  Hz), 5.05–5.15 (m, 2H), 4.56 (d, 1H,  $J = 6.9$  Hz), 4.52 (d, 1H,  $J = 6.9$  Hz), 3.90 (d, 1H,  $J = 15.1$  Hz), 3.77 (q, 1H,  $J = 4.8$  Hz), 3.38–3.46 (m, 1H), 3.27 (s, 3H), 2.45–2.70 (m, 3H), 2.26–2.38 (m, 1H), 1.88–2.08 (m, 2H);  $^{13}\text{C}$  NMR ( $\text{CDCl}_3$ , 75 MHz),  $\delta$ : 169.4, 137.2, 135.5, 128.6, 127.8, 127.3, 117.7, 95.6, 72.9, 57.9, 55.6, 48.7, 33.9, 28.8, 23.3; EI-HRMS calcd for  $\text{C}_{14}\text{H}_{18}\text{NO}_3$  ( $\text{M}-\text{CH}_2\text{CH}=\text{CH}_2$ ) 248.1287, found 248.1295.

## Preparation of compound **11**

To a solution of **10** (289 mg, 0.45 mmol) in THF (5 mL) was added  $\text{LiAlH}_4$  (1 M in THF, 0.54 mL). The mixture was heated at reflux for 1 h, cooled at 0 °C, and the reaction was quenched by addition of 10 drops of water and 7 drops of 5 M aqueous  $\text{NaOH}$  solution. The mixture was stirred for another 20 min, at which time the suspension was filtered through a short pad of Celite<sup>®</sup>. The solvent was removed under reduced pressure and the residue was purified by flash chromatography ( $\text{CH}_2\text{Cl}_2$ ) to give *N*-benzyl piperidine derivative (114 mg, 93%) as a light yellow oil.

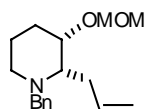

$[\alpha]_D^{22} = -14.2^\circ$  ( $c$  1.23,  $\text{CHCl}_3$ ); IR  $\nu_{\text{max}}$ : 1143, 1096, 1037  $\text{cm}^{-1}$ ;  $^1\text{H}$  NMR ( $\text{CDCl}_3$ , 300 MHz),  $\delta$ : 7.20–7.32 (m, 5H), 5.82–5.96 (m, 1H), 5.06 (d, 1H,  $J = 17.1$  Hz), 4.99 (d, 1H  $J = 10.0$  Hz), 4.64 (s, 3H), 3.75–3.85 (m, 1H), 3.74 (s, 2H), 3.36 (s, 3H), 2.83–2.94 (m, 1H), 2.42–2.62 (m, 2H), 2.28–2.40 (m, 2H), 1.40–1.70 (m, 4H);  $^{13}\text{C}$  NMR ( $\text{CDCl}_3$ , 75 MHz),  $\delta$ : 139.5, 138.2, 128.6, 128.1, 126.7, 115.4, 95.2, 74.5, 62.3, 58.2, 55.4, 46.6, 29.0, 27.1, 21.8; EI-HRMS calcd for  $\text{C}_{14}\text{H}_{20}\text{NO}_2$  ( $\text{M}-\text{CH}_2\text{CH}=\text{CH}_2$ ) 234.1494, found 234.1500.

To an ice-cold solution of the above amine (45 mg, 0.16 mmol) in 1,2-dichloroethane (3 mL) was added 1-chloroethyl chloroformate (26  $\mu\text{L}$ , 0.24 mmol). The reaction mixture was heated at reflux for 5 h, at which time the solvent was removed under reduced pressure. The residue was dissolved in methanol (3 mL) and heated at reflux for 30 min. The solvent was evaporated under reduced pressure. The crude secondary amine was dissolved in THF (2 mL) and treated with  $\text{Boc}_2\text{O}$  (52 mg) and  $\text{NaHCO}_3$  (40 mg) in water (2 mL). The suspension was vigorously stirred for 3 h, at which time it was extracted with ethyl acetate (x3). The combined organic layer was dried ( $\text{Na}_2\text{SO}_4$ ), filtered and evaporated under reduced pressure. The residue was purified by flash chromatography (5:1 v/v pet. ether:EtOAc) to give *N*-Boc piperidine derivative **11** (41 mg, 92%) as a light yellow oil.

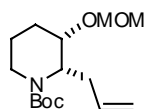

**11**  $[\alpha]_D^{22} = +34.8^\circ$  ( $c$  1.15,  $\text{CHCl}_3$ ); IR  $\nu_{\text{max}}$ : 1690, 1414, 1361, 1149, 1038  $\text{cm}^{-1}$ ;  $^1\text{H}$  NMR ( $\text{CDCl}_3$ , 300 MHz),  $\delta$ : 5.66–5.83 (m, 1H), 4.93–5.11 (m, 2H), 4.69 (d, 1H,  $J = 6.7$  Hz), 4.66 (d, 1H,  $J = 6.7$  Hz), 3.61–3.70 (m, 1H), 3.38 (s, 3H), 2.61–2.75 (m, 1H), 2.32–2.41 (m, 2H), 1.78–1.88 (m, 1H), 1.43–1.71 (m, 5H), 1.52 (s, 3H), 1.43 (s, 6H);  $^{13}\text{C}$  NMR ( $\text{CDCl}_3$ , 75 MHz),  $\delta$ : 155.0, 135.3, 116.5, 95.1, 85.1, 79.4, 74.2, 55.4, 28.6, 28.3, 27.4, 25.6, 24.2; EI-HRMS calcd for  $\text{C}_{15}\text{H}_{28}\text{NO}_4$  ( $\text{MH}^+$ ) 286.2018, found 286.2020.

## Preparation of compound **12**

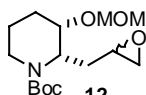

To a solution of **11** (32 mg, 0.11 mmol) in  $\text{CH}_2\text{Cl}_2$  (1 mL) was added 30% hydrogen peroxide (0.2 mL),  $\text{MeReO}_3$  (MTO) (0.2 mg) and 3-cyanopyridine (4.6 mg). The suspension was vigorously stirred for 2.5 days, at which time ice water was added and extracted with  $\text{CH}_2\text{Cl}_2$  (x3). The combined organic layers were washed with saturated aqueous  $\text{CuSO}_4$  solution (x3), dried ( $\text{Na}_2\text{SO}_4$ ), filtered and then evaporated under reduced pressure. The residue was purified by flash chromatography (5:1 v/v pet. ether:EtOAc) to give recovered **11** (8 mg), and the desired epoxide **12** (20 mg, 80% conversion) as an inseparable mixture of diastereomers. IR  $\nu_{\text{max}}$ : 1689, 1413, 1149, 1037  $\text{cm}^{-1}$ ;  $^1\text{H}$  NMR ( $\text{CDCl}_3$ , 300 MHz),  $\delta$  (two diastereomers): 4.50–4.80 (m, 3H), 3.80–4.10 (m, 1H), 3.55–3.75 (m, 1H), 3.35 (s, 3H), 2.85–3.00 (m, 1H), 2.50–2.80 (m, 2H), 2.35–2.45 (m, 1H), 1.55–1.90 (m, 4H), 1.30–1.55 (m, 2H), 1.44 (s, 9H);  $^{13}\text{C}$  NMR ( $\text{CDCl}_3$ , 75 MHz),  $\delta$  (two diastereomers): 154.8, 95.2, 79.9, 74.0, 55.5, 50.5, 47.2, 46.4, 28.3, 27.7, 27.5, 25.7, 24.1; CI( $\text{NH}_3$ )-HRMS calcd for  $\text{C}_{15}\text{H}_{28}\text{NO}_5$  ( $\text{MH}^+$ ) 302.1967, found 302.1978.

### Preparation of compound **13**.

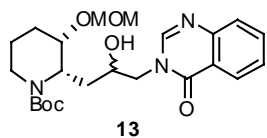

To a solution of epoxide **12** (37 mg, 0.123 mmol) in methanol (1.5 mL) was added 4-hydroxyquinazoline (22 mg, 0.148 mmol) and potassium hydroxide (1.3 mg, 0.024 mmol). The reaction mixture was heated at reflux for 48 h. Upon cooling, the solvent was removed under reduced pressure. The crude oil was dissolved in CH<sub>2</sub>Cl<sub>2</sub> (10 mL), washed with 1 M aqueous NaOH (x3) and brine. The organic layer was dried (Na<sub>2</sub>SO<sub>4</sub>), filtered and evaporated under reduced pressure. The residue was purified by flash chromatography (2:1 v/v pet. ether:EtOAc and then EtOAc) to give recovered epoxide **12** (5 mg), and secondary alcohol **13** (32 mg, 68% conversion) as an inseparable diastereomeric mixture.  $[\alpha]_D^{22} = +38.6^\circ$  (*c* 1.10, CHCl<sub>3</sub>); IR  $\nu_{\max}$ : 3150–3550, 1681, 1612, 1416 cm<sup>-1</sup>; <sup>1</sup>H NMR (CDCl<sub>3</sub>, 300 MHz),  $\delta$  (two diastereomers): 8.20–8.35 (m, 2H), 7.68–7.78 (m, 2H), 7.45–7.53 (m, 1H), 4.66 (s, 2H), 4.55–4.70 (m, 1H), 4.33–4.55 (m, 2H), 3.80–3.90 (m, 1H), 3.65–3.80 (m, 1H), 3.54–3.65 (m, 1H), 3.36 (s, 3H), 2.62–2.80 (m, 1H), 1.77–1.95 (m, 2H), 1.60–1.77 (m, 2H), 1.44 (s, 3H), 1.36 (s, 6H), 1.20–1.60 (m, 2H); <sup>13</sup>C NMR (CDCl<sub>3</sub>, 75 MHz),  $\delta$  (two diastereomers): 161.2, 156.6, 148.1, 148.0, 134.3, 134.2, 127.4, 127.2, 127.1, 126.9, 126.7, 126.6, 95.4, 95.0, 80.9, 80.7, 77.2, 73.4, 65.4, 55.7, 55.6, 52.0, 51.8, 49.5, 38.7, 30.0, 28.7, 28.4, 28.2, 28.1, 25.7, 24.0; EI-HRMS calcd for C<sub>23</sub>H<sub>33</sub>N<sub>3</sub>O<sub>6</sub> 447.2369, found 447.2361.

### Preparation of compound **14**.

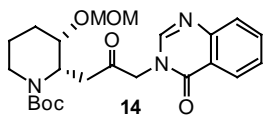

To a solution of **13** (16 mg, 0.036 mmol) in CH<sub>2</sub>Cl<sub>2</sub> (2 mL) was added Dess-Martin periodinane (0.3 M in CH<sub>2</sub>Cl<sub>2</sub>, 0.36 mL, 0.10 mmol). The mixture was stirred at rt for 2.5 h, then was quenched by addition of aqueous Na<sub>2</sub>S<sub>2</sub>O<sub>3</sub> and extracted with EtOAc (x3). The combined organic layers were washed with saturated aqueous NaHCO<sub>3</sub> (x2), brine, dried (Na<sub>2</sub>SO<sub>4</sub>), filtered and then evaporated under reduced pressure. The residue was purified by flash chromatography (1:2 v/v pet. ether:EtOAc and then EtOAc) to afford ketone **14** (14.6 mg, 92%):  $[\alpha]_D^{22} = +50.0^\circ$  (*c* 0.60, CHCl<sub>3</sub>); IR  $\nu_{\max}$ : 1729, 1680, 1612, 1473, 1412, 1364 cm<sup>-1</sup>; <sup>1</sup>H NMR (CDCl<sub>3</sub>, 300 MHz),  $\delta$ : 8.28 (dd, 1H, *J* = 8.4, 0.8), 8.02 (br. s, 1H), 7.68–7.80 (m, 2H), 7.49 (ddd, 1H, *J* = 8.1, 6.5, 1.9 Hz), 5.10–5.30 (m, 1H), 4.85–5.05 (m, 2H), 4.68 (br. s, 2H), 3.78–3.95 (br. s, 1H), 3.74 (quint, 1H, *J* = 10.9, 5.6 Hz), 3.40 (s, 3H), 2.96–3.12 (m, 1H), 2.74–2.92 (m, 1H), 2.50–2.72 (m, 1H), 1.84–1.96 (m, 1H), 1.60–1.80 (m, 1H), 1.32–1.56 (m, 2H), 1.44 (s, 9H); <sup>13</sup>C NMR (CDCl<sub>3</sub>, 75 MHz),  $\delta$ : 201.1, 160.9, 155.4, 148.1, 147.0, 134.3, 127.4, 127.2, 126.8, 121.9, 95.6, 80.6, 77.2, 74.2, 55.8, 53.4, 51.3, 38.5, 36.6, 28.4, 25.5, 23.8; EI-HRMS calcd for C<sub>23</sub>H<sub>31</sub>N<sub>3</sub>O<sub>6</sub> 445.2213, found 445.2209.

### (+)-Isofebrifugine (**1**)

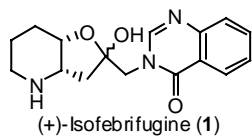

The solution of MOM ether **14** (11 mg, 0.024 mmol) in 6 M aqueous HCl (2 mL) was heated at reflux for 2.5 h. After the reaction mixture was cooled to rt, the mixture was treated with solid Na<sub>2</sub>CO<sub>3</sub> and then extracted with chloroform (x3). The combined organic layers were dried (Na<sub>2</sub>SO<sub>4</sub>), filtered and then evaporated under reduced pressure. The residue was purified by flash

chromatography (2:1 v/v CH<sub>2</sub>Cl<sub>2</sub>:MeOH) to afford isofebrifugine (**1**) (6.6 mg, 89%):  $[\alpha]_D^{22} +120.8^\circ$  (c 0.30, CHCl<sub>3</sub>); IR  $\nu_{\max}$ : 3100–3575, 1672, 1609, 1473 cm<sup>-1</sup>; <sup>1</sup>H NMR (CDCl<sub>3</sub>, 300 MHz),  $\delta$ : 8.30 (dd, 1H, J = 7.8, 1.3 Hz), 8.29 (s, 1H), 7.75 (ddd, 1H, J = 8.1, 8.1, 1.4 Hz), 7.70 (dd, 1H, J = 8.1, 1.4 Hz), 7.49 (dtd, 1H, J = 8.1, 6.8, 1.5 Hz), 4.44 (d, 1H, J = 13.9 Hz), 4.15 (d, 1H, J = 13.9 Hz), 3.89 (q, 1H, J = 2.7 Hz), 3.30 (dd, 1H, J = 3.3, 3.3 Hz), 2.99 (dd, 1H, J = 11.0, 2.8 Hz), 2.54 (ddd, 1H, J = 13.2, 2.0, 13.2 Hz), 2.05–2.15 (m, 2H), 1.88 (d, 1H, J = 13.1 Hz), 1.75–1.86 (m, 1H), 1.47–1.62 (m, 2H); <sup>13</sup>C NMR (CDCl<sub>3</sub>, 75 MHz),  $\delta$ : 161.5, 148.2, 148.1, 134.3, 127.5, 127.0, 126.9, 121.9, 105.4, 77.6, 55.7, 49.9, 44.5, 43.3, 26.7, 20.0; CI(NH<sub>3</sub>)-HRMS calcd for C<sub>16</sub>H<sub>20</sub>N<sub>3</sub>O<sub>3</sub> (MH<sup>+</sup>) 302.1504, found 302.1495.

## Preparation of compound **16**.

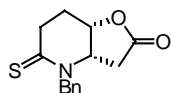

The bicyclic lactam lactone **6** (361 mg, 1.47 mmol) was dissolved in dry THF (20 mL) under Ar. Lawesson's reagent (328 mg, 0.81 mmol, 0.55 mol eq) was added to the solution and the mixture was refluxed. After 3 h, the reaction mixture was cooled and then concentrated. The crude product was purified by chromatography, initially using 5:1 v/v CH<sub>2</sub>Cl<sub>2</sub>-hexane as eluent to remove the non-polar sulfur impurities and then 2:1 v/v pet. ether-EtOAc to obtain the desired thiolactam **17** (376 mg, 98 %) as a viscous pale yellow oil.

$[\alpha]_D^{22} = +85.0^\circ$  (c 0.50, CHCl<sub>3</sub>); IR  $\nu_{\max}$ : 3075, 3050, 1778, 1343, 1161 cm<sup>-1</sup>; <sup>1</sup>H NMR (CDCl<sub>3</sub>, 300 MHz),  $\delta$ : 7.25–7.38 (m, 5H), 6.10 (d, 1H, J = 14.8 Hz), 4.58 (d, 1H, J = 14.8 Hz), 4.90–4.98 (m, 1H), 4.33 (ddd, 1H, J = 8.8, 7.5, 4.3 Hz), 3.29 (ddd, 1H, J = 17.6, 3.7 Hz), 2.92 (ddd, 1H, J = 16.9, 2.4, 4.1 Hz), 2.83 (dd, 1H, J = 18.6, 9.1 Hz), 2.57 (dd, 1H, J = 18.6, 4.1 Hz), 2.20 (ddd, 1H, J = 14.5, 7.9, 3.9 Hz), 1.91 (dddd, 1H, J = 14.5, 12.5, 3.6 Hz). <sup>13</sup>C NMR (CDCl<sub>3</sub>, 75 MHz),  $\delta$ : 202.0, 173.1, 134.5, 129.1, 128.3, 127.9, 76.0, 56.2, 55.3, 36.6, 35.3, 24.6; EI-HRMS calcd for C<sub>14</sub>H<sub>15</sub>NO<sub>2</sub>S 261.0823, found 261.0816.

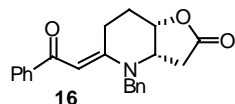

The above thiolactam (280 mg, 1.07 mmol) was dissolved in dry MeCN (0.5 mL) under Ar. A solution of 98 % phenacyl bromide (261 mg, 1.29 mmol, 1.2 mol eq) in dry MeCN (2 mL) was added via cannula to the thiolactam solution. The reaction mixture was stirred in the dark at rt for 24 h. The reaction mixture was diluted with dry CH<sub>2</sub>Cl<sub>2</sub> (5 mL). A solution of Ph<sub>3</sub>P (508 mg, 1.94 mmol) in dry CH<sub>2</sub>Cl<sub>2</sub> (4 mL) was added via cannula and the mixture was stirred at rt for 15 min. Then 1-methylpiperidine (394  $\mu$ L, 3.21 mmol) was added and the mixture was stirred in the dark at rt for 24 h. The reaction mixture was concentrated, toluene (10 mL) was added to the residue and the mixture was evaporated. The crude product was purified by chromatography (1:1 v/v pet. ether-EtOAc and then 2:1 v/v EtOAc-pet. ether) to furnish the vinylogous amide **16** (249.8 mg, 67 %) as a light brown solid. mp: 56–56.5 °C;  $[\alpha]_D^{22} = +104.6^\circ$  (c 2.70, CHCl<sub>3</sub>); IR  $\nu_{\max}$ : 3050, 3012, 1778, 1613, 1600, 1587, 1562, 1525 cm<sup>-1</sup>; <sup>1</sup>H NMR (CDCl<sub>3</sub>, 300 MHz),  $\delta$ : 7.59 (br d, 2H, J = 7.1 Hz), 7.18–7.44 (m, 8H), 5.88 (br. s, 1H), 4.99 (ddd, 1H, J = 7.4, 3.7, 3.7 Hz), 4.63 (d, 1H, J = 16.3 Hz), 4.39 (d, 1H, J = 16.3 Hz), 4.28 (ddd, 1H, J = 4.3, 7.9, 7.9 Hz), 4.07 (ddd, 1H, J = 18.1, 3.1, 3.1 Hz), 2.81 (dd, 1H, J = 18.3, 8.5 Hz), 2.77–2.90 (m, 1H), 2.57 (dd, 1H, J = 18.3, 4.2 Hz), 2.18 (dddd, 1H, J = 13.4, 4.2, 4.2, 4.2 Hz), 1.82–1.95 (m, 1H). <sup>13</sup>C NMR (CDCl<sub>3</sub>, 75 MHz),  $\delta$ : 189.1, 174.3, 162.2, 142.2, 135.3, 131.0, 129.4, 128.4, 128.2, 127.5, 126.9, 95.3, 76.9, 57.2, 54.3, 36.1, 23.7, 21.7. EI-HRMS calcd for C<sub>22</sub>H<sub>21</sub>NO<sub>3</sub> 347.1521, found 347.1526.

### Preparation of compound **18a,b**.

A suspension of platinum(IV) oxide (40 mg) in ethyl acetate (20 mL) was activated by mixing with hydrogen (45 psi) in a Parr flask for 30 min. A solution of the vinylogous amide **16** (244 mg, 0.70 mmol) in ethyl acetate (30 mL) was then added to the activated catalyst and the mixture was shaken under hydrogen (45 psi) for 4 h. The mixture was filtered through Celite<sup>®</sup>, the residue washed several times with ethyl acetate. The combined filtrates were evaporated under reduced pressure and the residue was purified by chromatography (pet. ether:EtOAc/2:1) to give 215 mg (88%) of phenyl ketone **18a** as white solid and the minor epimer **18b** (24 mg, 10%).

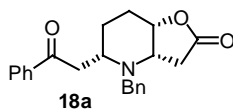

Compound **18a**: mp:  $[\alpha]_D^{22} = -31.4^\circ$  (*c* 0.875, CH<sub>2</sub>Cl<sub>2</sub>); IR  $\nu_{\max}$ : 1778, 1678, 1219, 1155 cm<sup>-1</sup>; <sup>1</sup>H NMR (CDCl<sub>3</sub>, 300 MHz),  $\delta$ : 7.63 (br d, 2H, *J* = 7.3 Hz), 7.49 (br t, 1H, *J* = 7.3 Hz), 7.14–7.40 (m, 7H), 4.55 (ddd, 1H, *J* = 3.4, 3.0, 3.0 Hz), 3.78 (d, 1H, *J* = 17.0 Hz), 3.70 (d, 1H, *J* = 17.0 Hz), 3.35 (t, 1H, *J* = 4.1 Hz), 3.22–3.32 (m, 1H), 3.09 (dd, 1H, *J* = 3.9, 17.2 Hz), 2.71 (dd, 1H, *J* = 17.2, 8.2 Hz), 2.68 (dd, 1H, *J* = 16.8, 4.7 Hz), 2.52 (d, 1H, *J* = 16.7 Hz), 2.12–2.24 (m, 1H), 1.60–1.84 (m, 3H). <sup>13</sup>C NMR (CDCl<sub>3</sub>, 75 MHz),  $\delta$ : 198.4, 176.2, 140.5, 136.7, 132.8, 128.3, 128.2, 127.5, 126.63, 126.6, 78.0, 60.7, 57.3, 56.8, 43.7, 38.8, 26.5, 24.8. EI-HRMS calcd for C<sub>22</sub>H<sub>23</sub>NO<sub>3</sub> 349.1678, found 349.1669; calcd for C<sub>15</sub>H<sub>16</sub>NO<sub>3</sub> (M–PhCH<sub>2</sub>) 258.1130, found 258.1127.

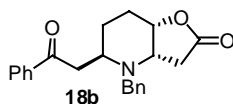

Compound **18b**: IR  $\nu_{\max}$ : 1772, 1672 cm<sup>-1</sup>; <sup>1</sup>H NMR (CDCl<sub>3</sub>, 300 MHz),  $\delta$ : 7.67 (br d, 2H, *J* = 7.5 Hz), 7.44 (t, 1H, *J* = 7.3 Hz), 7.14–7.34 (m, 7H), 4.45–4.54 (m, 1H), 3.76 (d, 1H, *J* = 14.7 Hz), 3.43 (d, 1H, *J* = 14.4 Hz), 3.23–3.50 (m, 3H), 2.85 (dd, 1H, *J* = 14.0, 9.4 Hz), 2.63 (dd, 1H, *J* = 17.0, 2.0 Hz), 2.54 (dd, 1H, *J* = 17.0, 4.9 Hz), 1.75–1.98 (m, 3H), 1.25–1.38 (m, 1H). <sup>13</sup>C NMR (CDCl<sub>3</sub>, 75 MHz),  $\delta$ : 199.4, 175.9, 138.0, 136.4, 133.3, 128.7, 128.6, 128.1, 128.0, 127.5, 77.6, 55.5, 54.3, 50.5, 36.2, 34.4, 24.7, 21.3. EI-HRMS calcd for C<sub>22</sub>H<sub>23</sub>NO<sub>3</sub> 349.1678, found 349.1680; calcd for C<sub>15</sub>H<sub>16</sub>NO<sub>3</sub> (M–PhCH<sub>2</sub>) 258.1130, found 258.1127.

### Preparation of compound **19**.

Palladium(II) hydroxide/C (20 wt %, 114 mg) was washed with dry ethanol (10 mL) and then suspended in fresh, dry ethanol (10 mL). Redistilled cyclohexene (3 mL) was added and the mixture was refluxed under Ar for 30 min. and then cooled. A solution of the N-benzyl piperidine **18a** (228 mg) in dry ethanol (20 mL) was added and the mixture was refluxed under Ar. After 2 h, the reaction mixture was cooled to rt and then filtered through Celite<sup>®</sup>, and the residue washed several times with 95% ethanol. The combined filtrates were concentrated to give crude piperidine derivative (169 mg). An analytical sample was purified by chromatography (EtOAc and then 10:1 v/v EtOAc:MeOH).

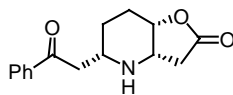

$[\alpha]_D^{22} = +20.0^\circ$  (*c* 1.25, CH<sub>2</sub>Cl<sub>2</sub>); IR  $\nu_{\max}$ : 1772, 1678 cm<sup>-1</sup>; <sup>1</sup>H NMR (CDCl<sub>3</sub>, 300 MHz),  $\delta$ : 7.89–7.96 (m, 2H), 7.57 (dt, 1H, *J* = 7.3, 1.3 Hz), 4.40 (ddd, 1H, *J* = 3.2, 3.2, 3.2 Hz), 7.40–7.50 (m, 2H), 3.67 (dd, 1H, *J* = 4.2, 3.4 Hz), 3.14–3.25 (m, 1H), 3.08 (dd, 1H, *J* = 17.6, 3.8 Hz), 2.99 (dd, 1H, *J* = 17.6, 8.4 Hz), 2.67 (dd, 1H, *J* = 16.5, 4.4 Hz), 2.20–2.36 (m, 2H), 1.67–1.82 (m, 1H), 1.48–1.58 (m, 2H). <sup>13</sup>C NMR (CDCl<sub>3</sub>, 75 MHz),  $\delta$ : 199.2, 176.9, 136.7, 133.4, 128.6, 127.9, 76.9, 53.4,

49.8, 44.9, 40.4, 26.1, 25.9. HRMS calcd for C<sub>15</sub>H<sub>17</sub>NO<sub>3</sub> 259.1208, found 259.1200.

The crude amine above (169 mg) was dissolved in CH<sub>2</sub>Cl<sub>2</sub> (20 mL) and distilled water (10 mL) was added. Potassium carbonate (1.04 g, 7.53 mmol, 11.5 mol eq) was added to the biphasic mixture. The mixture was cooled to 0 °C and methyl chloroformate (466  $\mu$ L, 6.0 mmol, 9.2 mol eq) was added. The mixture was vigorously stirred for 22 h. Then the aqueous phase was separated and back extracted with CH<sub>2</sub>Cl<sub>2</sub>. The combined CH<sub>2</sub>Cl<sub>2</sub> layers were washed with water, dried, filtered and concentrated. The residual oil was purified by flash chromatography (2:1 v/v pet. ether-EtOAc and then 1:1 v/v pet. ether-EtOAc) to yield the carbamate **19** (131.2 mg, 63%).

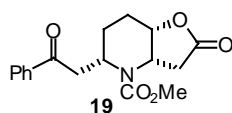

$[\alpha]_D^{29} = +47^\circ$  (c 1.22, CH<sub>2</sub>Cl<sub>2</sub>), IR  $\nu_{\max}$ : 3060, 1780, 1697, 1681, 1595, 1579 cm<sup>-1</sup>. <sup>1</sup>H NMR (CDCl<sub>3</sub>, 300 MHz),  $\delta$ : 7.89 (d, 2H, J = 7.5 Hz), 7.51 (t, 1H, J = 7.4 Hz), 7.40 (t, 2H, J = 7.8 Hz), 5.01 (q, 1H, J = 8.9 Hz), 4.72 (ddd, 1H, J = 10.7, 5.6, 5.6 Hz), 3.61 (s, 3H), 4.55–4.61 (m, 1H), 3.28 (br d, 1H, 15.5 Hz), 3.06 (dd, 1H, J = 15.5, 10.0 Hz), 2.92 (dd, 1H, J = 18.3, 9.8 Hz), 2.50 (dd, 1H, J = 18.3, 8.4 Hz), 1.68–1.93 (m, 3H), 1.55–1.62 (m, 1H). <sup>13</sup>C NMR (CDCl<sub>3</sub>, 75 MHz),  $\delta$ : 197.2, 174.2, 156.0, 136.2, 133.3, 128.6, 128.0, 76.0, 53.0, 48.8, 48.1, 43.9, 34.4, 23.3, 22.4. EI-HRMS: calcd for C<sub>17</sub>H<sub>19</sub>NO<sub>5</sub> 317.1263, found 317.1271.

#### Preparation of compound **20**.

A mixture of (*R*)-2-methyl-CBS-oxazaborolidine (1.0 M in toluene, 247  $\mu$ L, 0.247 mmol, 0.6 mol eq) and BH<sub>3</sub>.SMe<sub>2</sub> complex (1.67 M in ether, 148  $\mu$ L, 247 mmol, 0.6 mol eq) in dry THF (4 mL) was cooled to -40 °C, under Ar. A solution of the keto lactone **19** (131 mg, 0.413 mmol) in dry THF (3 mL) was added via cannula and the reaction mixture was stirred at -40 °C for 50 min. Saturated NH<sub>4</sub>Cl (1 mL) was added at -40 °C and the reaction mixture was allowed to warm slowly to rt. Brine (5 mL) and EtOAc (10 mL) were added and the mixture was stirred. The aqueous phase was separated and re-extracted with EtOAc (2 x 10 mL). The combined organic phases were washed with brine, dried, filtered and concentrated. The crude oil was purified by chromatography (1:1 v/v pet. ether-EtOAc) to afford the alcohol (113.6 mg, 86 %).

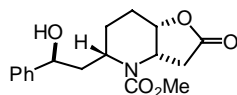

**15** (R = Me)  $[\alpha]_D^{29.5} = -2.79^\circ$  (c 2.68, CH<sub>2</sub>Cl<sub>2</sub>). IR  $\nu_{\max}$ : 3589–3307, 3048, 1778, 1736, 1689 cm<sup>-1</sup>. <sup>1</sup>H NMR (CDCl<sub>3</sub>, 300 MHz),  $\delta$ : 7.05–7.07 (m, 5H), 5.04 (q, 1H, J = 9.0 Hz), 4.74–4.83 (m, 2H), 4.34–4.43 (m, 1H), 2.87 (dd, 1H, J = 18.3, 9.7 Hz), 2.49 (dd, 1H, J = 18.3, 9.0 Hz), 2.10 (ddd, 1H, J = 13.9, 9.8, 4.0 Hz), 1.85–1.97 (m, 4H), 1.67–1.75 (m, 1H), 1.58–1.65 (br s, 1H). EI-HRMS: calcd for C<sub>17</sub>H<sub>21</sub>NO<sub>5</sub> 319.1420, found 319.1416.

The above secondary alcohol (113 mg, 0.356 mmol) was dissolved in dry CH<sub>2</sub>Cl<sub>2</sub> (3 mL) under Ar. 2,6-Lutidine (174  $\mu$ L, 1.49 mmol, 4.2 mol eq) was added. The mixture was cooled to -10 °C. Then TBSOTf (163  $\mu$ L, 0.712 mmol, 2 mol eq) was added dropwise to the mixture. After addition is complete, the reaction mixture was stirred at -10 °C for 15 min and then at 0 °C for 30 min. Then saturated NaHCO<sub>3</sub> (2 mL) was added followed by CH<sub>2</sub>Cl<sub>2</sub> (10 mL). The mixture was stirred and the aqueous was separated and back extracted with CH<sub>2</sub>Cl<sub>2</sub> (2 x 5 mL). The combined CH<sub>2</sub>Cl<sub>2</sub> layers were washed with 0.5 N aqueous H<sub>2</sub>SO<sub>4</sub> (2 x 5 mL), water and saturated NaHCO<sub>3</sub>. The organic extract was

dried, filtered and concentrated to give an oil. Purification by chromatography (2:1 v/v pet. ether-EtOAc) gave the TBS ether **20** (153 mg, 100 %).

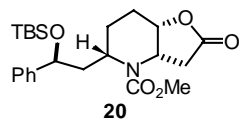

**20**  $[\alpha]_D^{24} = -20.6^\circ$  (*c* 1.34, CH<sub>2</sub>Cl<sub>2</sub>). IR  $\nu_{\max}$ : 3062, 3029, 1784, 1700 cm<sup>-1</sup>. <sup>1</sup>H NMR (CDCl<sub>3</sub>, 300 MHz),  $\delta$ : 0.06, 0.00 and -0.25 (s, 6H), 0.88 (s, 9H), 1.62–1.85 (m, 5H), 2.04 (ddd, 1H, *J* = 13.1, 8.6, 2.7 Hz), 2.34 (dd, 1H, *J* = 18.2, 9.0 Hz), 2.83 (dd, 1H, *J* = 18.2, 9.8 Hz), 3.65 (s, 3H), 4.17–4.27 (m, 1H), 4.64–4.72 (m, 2H), 5.00 (q, 1H, *J* = 9.1 Hz), 7.20–7.30 (m, 5H). <sup>13</sup>C NMR (CDCl<sub>3</sub>, 75 MHz),  $\delta$ : 174.2, 156.1, 144.1, 128.1, 127.3, 125.7, 76.0, 72.3, 52.8, 48.6, 47.9, 46.0, 33.9, 25.6, 23.2, 21.9, 18.0, -3.7, -4.7, -5.3. CI(NH<sub>3</sub>)-HRMS: calcd for C<sub>23</sub>H<sub>39</sub>N<sub>2</sub>O<sub>5</sub>Si (M+NH<sub>4</sub>) 451.2628, found 451.2633.

### Preparation of compound **21**.

The bicyclic lactone **20** (154.2 mg, 0.356 mmol) was dissolved in dry toluene (9 mL) under Ar, and dry pyridine (0.5M in toluene, 3.56 mL, 1.78 mmol, 5 mol eq) was added. Cl<sub>2</sub>TiMe<sub>2</sub> (0.2 M in toluene, 1.07 mmol, 5.35 mL, 3 mol eq) was added and the mixture was heated in an oil bath at 90 °C. After 1.5 h, the reaction mixture was cooled and a mixture of 2:1 v/v pet. ether-EtOAc containing 1 % Et<sub>3</sub>N (10 mL) was added. The reaction mixture was filtered through a short pad of silica gel-60. The residue was washed several times with 2:1 v/v pet. ether-EtOAc containing 1 % Et<sub>3</sub>N, and the combined filtrates were evaporated. The residual oil was dried under high vacuum for 10 min and then redissolved, under Ar, in dry MeOH. PPTS (10 mg) was added and the mixture was stirred for 4 h at rt. Et<sub>3</sub>N (1 mL) was added, the reaction mixture was concentrated and the residue purified by chromatography (4:1 v/v pet. ether-EtOAc) to furnish the cyclic ketal (92.1 mg, 57 %) as a mixture of anomers [6:1 based on integration of the ketal OMe siglet at  $\delta$  3.18 (major) and 3.24 (minor)].

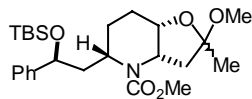

IR  $\nu_{\max}$ : 3061, 3027, 1701, 1603, 1545 cm<sup>-1</sup>. <sup>1</sup>H NMR (CD<sub>3</sub>OD, 300 MHz),  $\delta$  (minor anomer in brackets): 7.20–7.40 (m, 5H), 4.91 (q, 1H, *J* = 9.3 Hz) 4.78–4.85 (m, 1H), 4.20–4.29 (m, 1H), 4.03–4.15 (m, 1H), 3.66 (s, 3H), 3.18 (3.24) (s, 3H), 2.16–2.28 (m, 1H), 1.43–1.80 (m, 5H) 1.35 (1.40) (s, 3H), 0.91, (s, 9H), 0.06 and -0.22 (s, 6H).

A solution of the above cyclic ketal (92 mg, 0.198 mmol) in dry THF (5 mL) was transferred via cannula, under Ar, to a suspension of LiAlH<sub>4</sub> (75 mg, 1.99 mmol, 10 mol eq) in dry THF (4 mL). The mixture was refluxed for 16 h. The reaction mixture was cooled to rt and then at 0 °C. Aqueous 10 % NaOH was added dropwise to destroy unreacted LiAlH<sub>4</sub> and until all aluminum salts redissolved. Celite was added to the mixture and then CH<sub>2</sub>Cl<sub>2</sub> (20 mL). The mixture was stirred for 30 min and then suction filtered. The residue was washed with CH<sub>2</sub>Cl<sub>2</sub> (2 x 10 mL), and the combined filtrates were dried, filtered and concentrated. The crude product was purified by chromatography (3:1 v/v pet. ether-EtOAc) to yield the amine **21** (61.5 mg, 74 %).

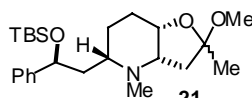

**21** IR  $\nu_{\max}$ : 3060, 3028 cm<sup>-1</sup>. <sup>1</sup>H NMR (CDCl<sub>3</sub>, 300 MHz),  $\delta$ : 7.20–7.35 (m, 5H), 4.68 (dd, 1H, *J* = 9.4, 2.6 Hz), 4.00–4.08 (m, 1H), 3.21 (s, 3H), 2.58–2.66 (m, 1H), 2.05–2.21 (m, 3H), 2.09 (s, 3H), 1.82–1.95 (m, 1H), 1.55–1.70 (m, 3H), 1.46 (s, 3H), 0.86 (s, 9H), 0.05, 0.00 and -0.27 (s, 6H).



$^{13}\text{C}$  NMR ( $\text{CDCl}_3$ , 75 MHz),  $\delta$ : 145.9, 128.0, 126.9, 125.7, 107.1, 76.1, 72.4, 65.6, 58.6, 48.6, 46.3, 45.6, 40.1, 25.7, 24.6, 22.6, 18.0, 1.2, -4.1, -4.5. EI-HRMS: calcd for  $\text{C}_{24}\text{H}_{41}\text{NO}_3\text{Si}$  419.2856, found 418.2864.

### (-)-Sedacryptine (**2**)

A solution of the cyclic ketal amine **21** (58.6 mg, 0.139 mmol) in dry THF (2 mL) was treated with  $\text{Bu}_4\text{NF}$  (1 M in THF, 167  $\mu\text{L}$ , 0.167 mmol, 1.2 mol eq) at 0  $^\circ\text{C}$ , under Ar. The mixture was then stirred at rt for 2.5 h, concentrated and the residue was subjected to chromatography (15:1 v/v EtOAc-MeOH) to give the secondary alcohol (52.6 mg), which was immediately mixed with 0.1 M aqueous HCl (2 mL) and then refluxed for 30 min. The mixture was cooled to rt and then at 0  $^\circ\text{C}$  and was treated with 28 %  $\text{NH}_4\text{OH}$  to pH 9. The mixture was extracted with  $\text{CH}_2\text{Cl}_2$  (2 x 10 mL) and the combined extracts were dried, filtered and concentrated. The residue was filtered through a short pad of silica gel-60 and using 10:1 v/v  $\text{CH}_2\text{Cl}_2$ -MeOH as solvent. The filtrate was concentrated and the residual oil was taken dissolved in MeOH and left to stand, in the dark, overnight (36 h). Then MeOH was evaporated and the residue was purified by chromatography (10:1 v/v EtOAc-MeOH) to furnish (-)-sedacryptine (23.5 mg, 57.7 %).

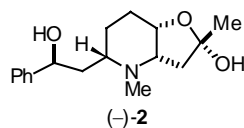

mp (cyclohexane): 123–125  $^\circ\text{C}$ ; lit.<sup>19d</sup> mp (cyclohexane): 122–123  $^\circ\text{C}$ .  $[\alpha]_{\text{D}}^{25} = -13.5^\circ$  ( $c$  0.74,  $\text{CHCl}_3$ ). IR  $\nu_{\text{max}}$ : 3530–3201, 3048  $\text{cm}^{-1}$ .  $^1\text{H}$  NMR ( $\text{CDCl}_3$ , 300 MHz),  $\delta$ : 7.20–7.35 (m, 5H), 6.60–6.80 (br s, 1H), 4.81 (dd, 1H,  $J = 10.1, 2.8$  Hz), 4.04 (q, 1H,  $J = 2.9$  Hz), 2.67 (t, 1H, 3.5 Hz), 2.25 (s, 3H), 2.23–2.35 (m, 2H), 2.20 (d, 1H,  $J = 13.2$  Hz), 2.16 (ddd, 1H,  $J = 13.6, 10.2, 2.8$  Hz), 2.05 (ddd, 1H,  $J = 13.6, 6.8, 1.8$  Hz), 1.88 (dd, 1H,  $J = 13.2, 3.9$  Hz), 1.77–1.85 (m, 2H), 1.48–1.62 (m, 2H), 1.45 (s, 3H).  $^{13}\text{C}$  NMR ( $\text{CDCl}_3$ , 75 MHz),  $\delta$ : 145.2, 128.6, 127.6, 125.5, 105.0, 76.9, 71.1, 65.5, 59.7, 44.3, 43.5, 39.7, 26.5, 25.5, 24.8. EI-HRMS: calcd for  $\text{C}_{17}\text{H}_{23}\text{NO}_2$  ( $\text{M}-\text{H}_2\text{O}$ ) 273.1729, found 273.1728.

### Preparation of cyclic carbamate **22**.

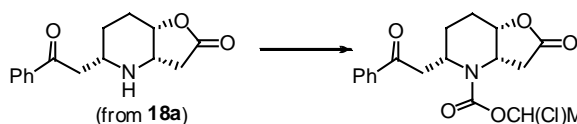

To a solution of secondary amine (43 mg, 0.17 mmol) in  $\text{CH}_2\text{Cl}_2$  (4 mL) was added  $\text{K}_2\text{CO}_3$  (140 mg, 1.02 mmol) in water (2 mL) and 1-chloroethyl chloroformate (44  $\mu\text{L}$ , 0.41 mol). The suspension was vigorously stirred at rt for 2 h. Organic layer was separated and aqueous layer was extracted with  $\text{CH}_2\text{Cl}_2$  (x3). Combined organic layers were washed with brine, dried ( $\text{Na}_2\text{SO}_4$ ), filtered and evaporated under reduced pressure. The residue was purified by flash chromatography (1:1 v/v pet. ether:EtOAc) to give the keto carbamate (58 mg, 96%) as a white solid and as a mixture of diastereomers. mp: 55–56  $^\circ\text{C}$ ;  $[\alpha]_{\text{D}}^{24} = +27.4^\circ$  ( $c$  1.55,  $\text{CH}_2\text{Cl}_2$ ); IR  $\nu_{\text{max}}$ : 1778, 1713, 1678, 1407, 1372, 1296, 1096  $\text{cm}^{-1}$ ;  $^1\text{H}$  NMR ( $\text{CDCl}_3$ , 300 MHz),  $\delta$  (two diastereomers): 7.92–8.00 (m, 2H), 7.54–7.62 (m, 1H), 7.42–7.52 (m, 2H), 6.57 (sextet, 1H,  $J = 5.8$  Hz), 4.98–5.12 (m, 1H), 4.76–4.86 (m, 1H), 4.60–4.76 (m, 1H), 3.43 (dd, 1H,  $J = 15.9, 3.2$  Hz), 3.17 (dt, 1H,  $J = 15.9, 9.5$  Hz), 3.02 (dd, 1H,  $J = 18.3, 9.7$  Hz), 2.58 (dt, 1H,  $J = 18.3, 8.1$  Hz), 1.60–2.06 (m, 7H).  $^{13}\text{C}$  NMR ( $\text{CDCl}_3$ , 75 MHz),  $\delta$ : (major epimer) 196.9, 173.8, 153.0, 136.2, 133.6, 128.7, 128.1, 83.2, 75.9, 49.1,

48.3, 43.7, 34.6, 25.2, 23.1, 22.3;  $\delta$  (minor epimer): 196.8, 173.8, 152.9, 136.2, 133.6, 128.7, 128.1, 83.2, 75.8, 49.1, 48.5, 44.2, 34.5, 25.1, 23.4, 22.5; EI-HRMS calcd for  $C_{18}H_{20}ClNO_5$  365.1030, found 365.1031.

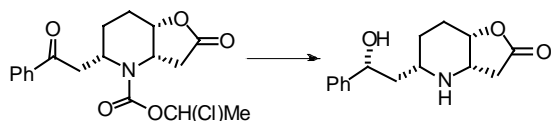

To a solution of phenyl ketone (14.5 mg, 0.04 mmol) in THF (2 mL) at  $-35\text{ }^{\circ}\text{C}$  was added (*R*)-2-methyl-CBS-oxazaborolidine (1.0 M in toluene, 75  $\mu\text{L}$ , 0.075 mmol) and  $\text{BH}_3\cdot\text{SMe}_2$  complex in ether (5.0 M, 24  $\mu\text{L}$ , 0.024 mmol). It was stirred at  $-35\text{ }^{\circ}\text{C}$  for 30 min and then reaction mixture was quenched by addition of water and diluted with EtOAc. Organic layer was separated and aqueous layer was extracted with EtOAc (x3). The combine organic layers were washed with brine, dried ( $\text{Na}_2\text{SO}_4$ ), filtered and evaporated under reduced pressure. The residue was submitted to flash (1:1 v/v pet. ether:EtOAc) to give 14 mg of secondary alcohol. The secondary alcohol was dissolved in methanol (2 mL) and heated at reflux for 40 min. Upon cooling to rt, the reaction mixture was stirred with 150 mg of Amberlite resin IR-45 ( $\text{OH}$ ) for 30 min. The resin was filtered off, washed twice with methanol and the combined filtrates were evaporated under reduced pressure. The residue was purified by flash chromatography (2:1 and then 1:1 v/v  $\text{CH}_2\text{Cl}_2$ :acetone) to give the amino alcohol (8.5 mg, 82%):  $[\alpha]_D^{23} = -76.7^{\circ}$  (*c* 0.88,  $\text{CH}_2\text{Cl}_2$ ); IR  $\nu_{\text{max}}$ : 3318 (br.), 1772, 1155  $\text{cm}^{-1}$ ;  $^1\text{H}$  NMR ( $\text{CDCl}_3$ , 300 MHz),  $\delta$ : 7.20–7.40 (m, 5H), 4.90 (dd, 1H,  $J = 10.2, 2.9$  Hz), 4.35 (ddd, 1H,  $J = 4.0, 4.0, 3.0$  Hz), 3.62 (dd, 1H,  $J = 5.4, 3.0$  Hz), 3.06 (br. s, 2H), 2.86 (dddd, 1H,  $J = 13.9, 9.7, 2.5, 2.5$  Hz), 2.79 (dd, 1H,  $J = 13.7, 5.4$  Hz), 2.35 (d, 2H,  $J = 17.1$  Hz), 1.70–1.90 (m, 2H), 1.46–1.68 (m, 2H), 1.26–1.43 (m, 1H).  $^{13}\text{C}$  NMR ( $\text{CDCl}_3$ , 75 MHz),  $\delta$ : 176.2, 144.5, 128.4, 127.4, 125.6, 76.3, 75.0, 55.2, 53.7, 45.0, 39.0, 26.5, 26.0. EI-HRMS calcd for  $C_{15}H_{19}NO_3$  261.1365, found 261.1362.

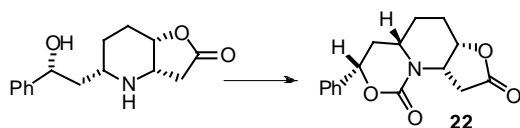

To a solution of amino alcohol **9** (8 mg, 0.031 mmol) in  $\text{CH}_2\text{Cl}_2$  (3 mL) at  $-78\text{ }^{\circ}\text{C}$  was added  $\text{Et}_3\text{N}$  (6  $\mu\text{L}$ ) and triphosgene (12 mg, 0.04 mmol) in  $\text{CH}_2\text{Cl}_2$  (1 mL) via cannula. The reaction mixture was stirred at  $-78\text{ }^{\circ}\text{C}$  for 1 h and then was quenched by addition of saturated aqueous  $\text{NaHCO}_3$  solution. The cold bath was removed and the reaction temperature was allowed to warm slowly to rt. The organic layer was separated and the aqueous phase was extracted with  $\text{CH}_2\text{Cl}_2$  (x3). The combined organic layers were washed with brine, dried ( $\text{Na}_2\text{SO}_4$ ), filtered and evaporated under reduced pressure. The residue was purified by flash chromatography (2:1 then 1:1 v/v pet. ether: EtOAc and finally EtOAc) to give 5.5 mg (63%) of the cyclic carbamate.  $[\alpha]_D^{22} = -11.1^{\circ}$  (*c* 0.225,  $\text{CHCl}_3$ ); IR  $\nu_{\text{max}}$ : 1778, 1689, 1407  $\text{cm}^{-1}$ ;  $^1\text{H}$  NMR ( $\text{CDCl}_3$ , 300 MHz),  $\delta$ : 7.30–7.42 (m, 5H), 5.37 (dd, 1H,  $J = 12.0, 3.8$  Hz), 4.79–4.84 (m, 1H), 4.27 (“t”, 1H,  $J = 5.8$  Hz), 3.51–3.62 (m, 1H), 3.27 (d, 1H,  $J = 18.9$  Hz), 3.07 (dd, 1H,  $J = 18.9, 6.4$  Hz), 2.29–2.38 (m, 1H), 2.24 (ddd, 1H,  $J = 13.8, 3.8, 2.5$  Hz), 2.04 (ddd, 1H,  $J = 13.7, 11.7, 11.2$  Hz), 1.70–1.82 (m, 3H).  $^{13}\text{C}$  NMR ( $\text{CDCl}_3$ , 75 MHz),  $\delta$ : 175.6, 154.3, 138.8, 128.71, 128.67, 125.4, 79.2, 76.5, 53.5, 53.2, 39.8, 38.2, 24.6, 24.2. EI-HRMS calcd for  $C_{16}H_{17}NO_4$  287.1158, found 287.1159.

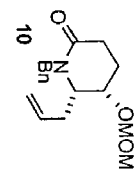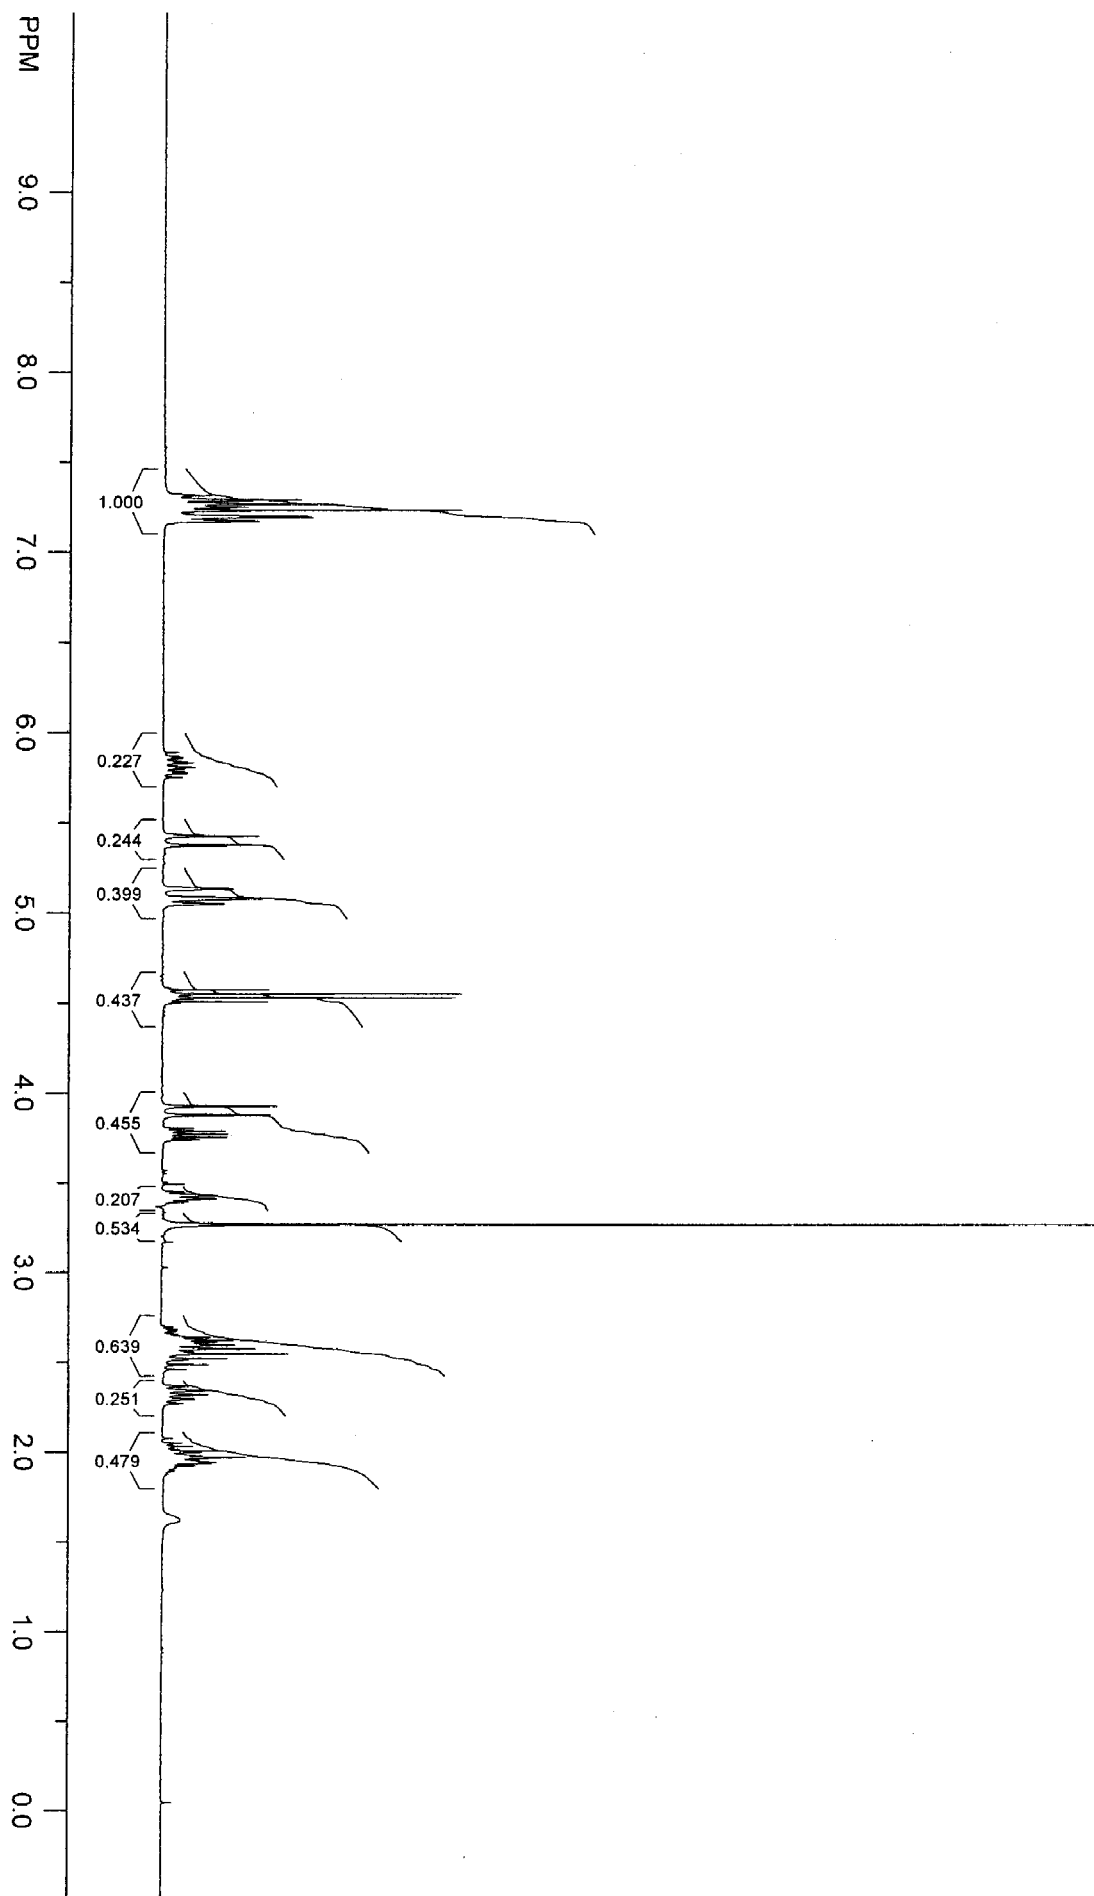

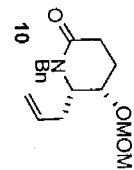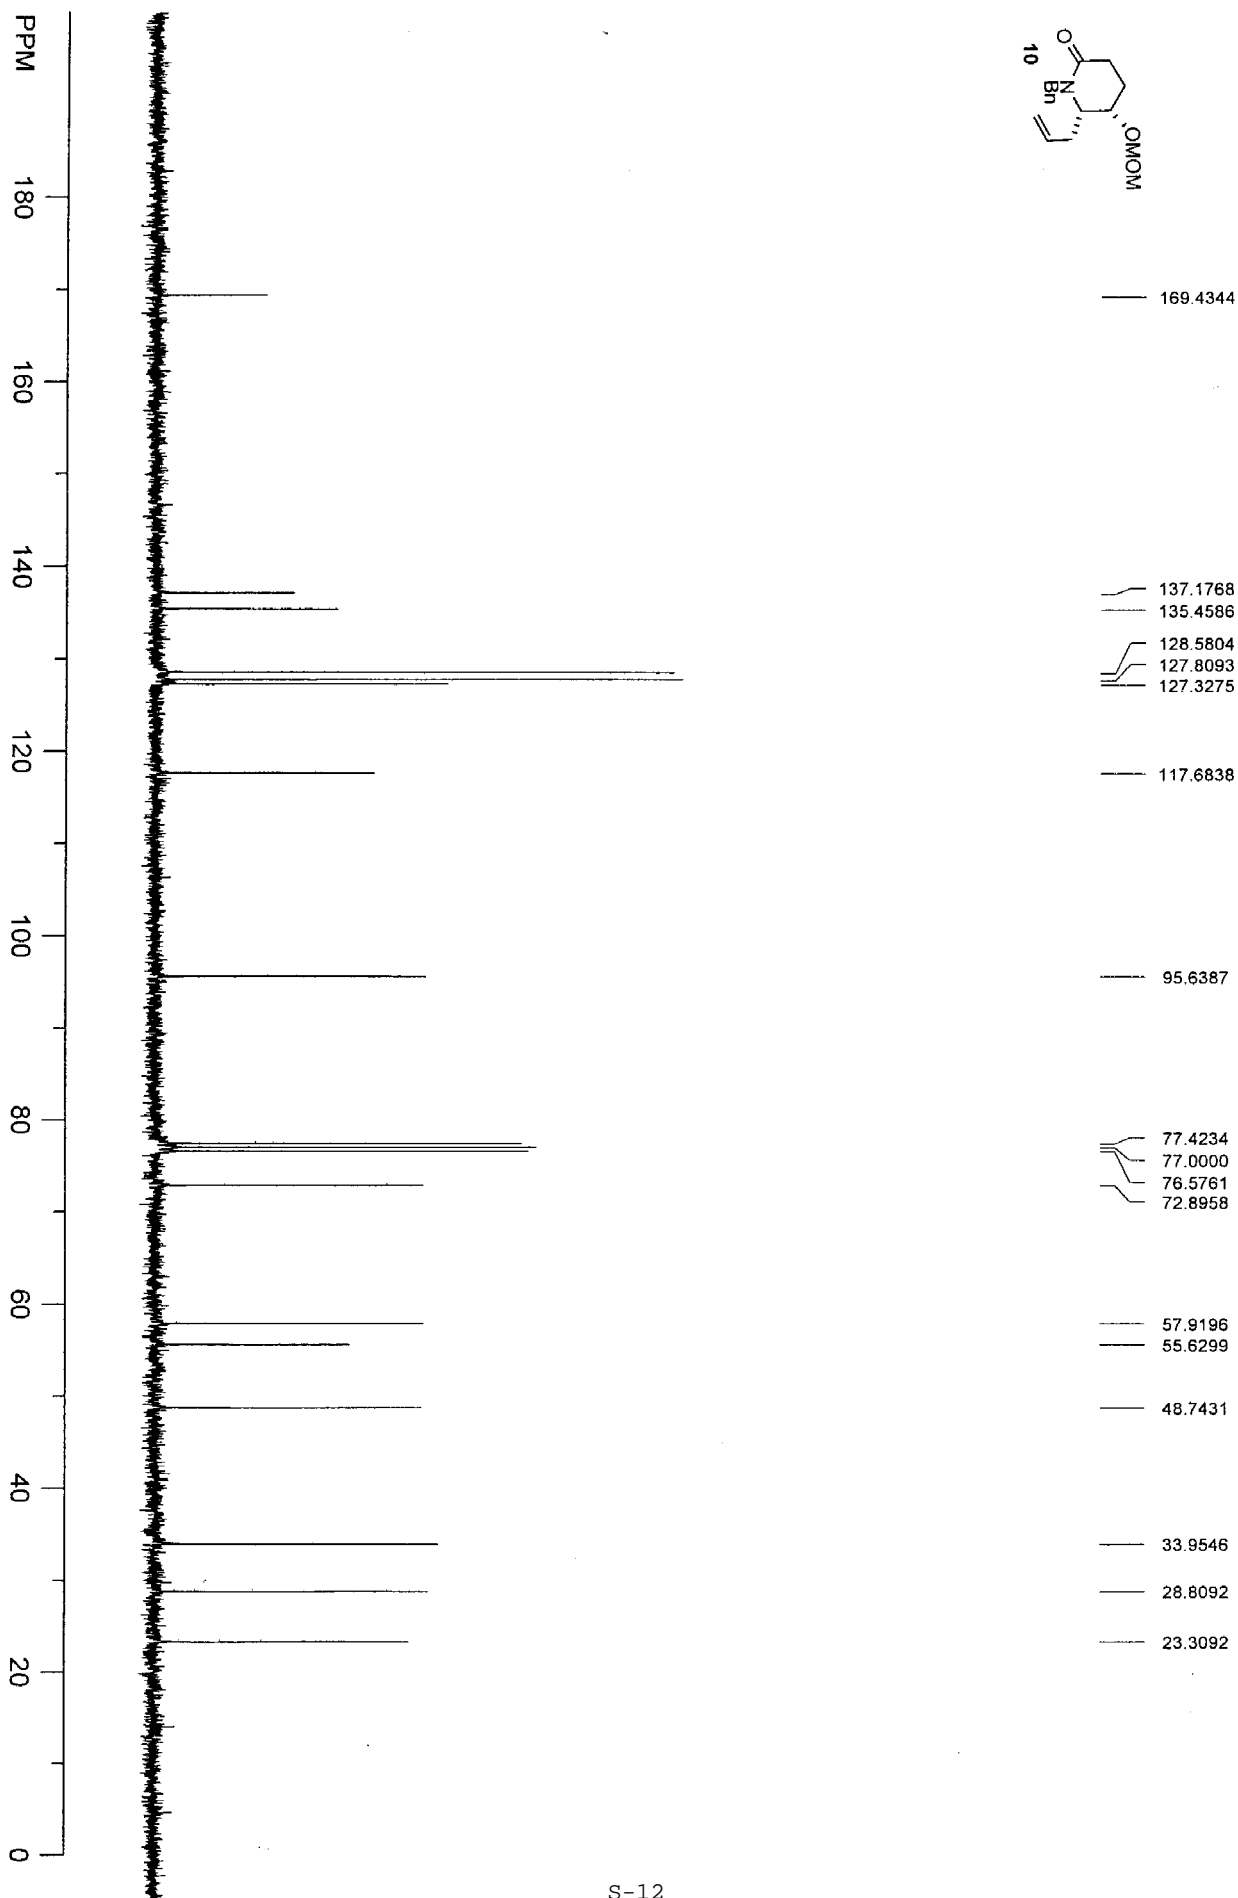

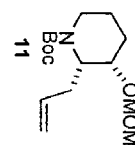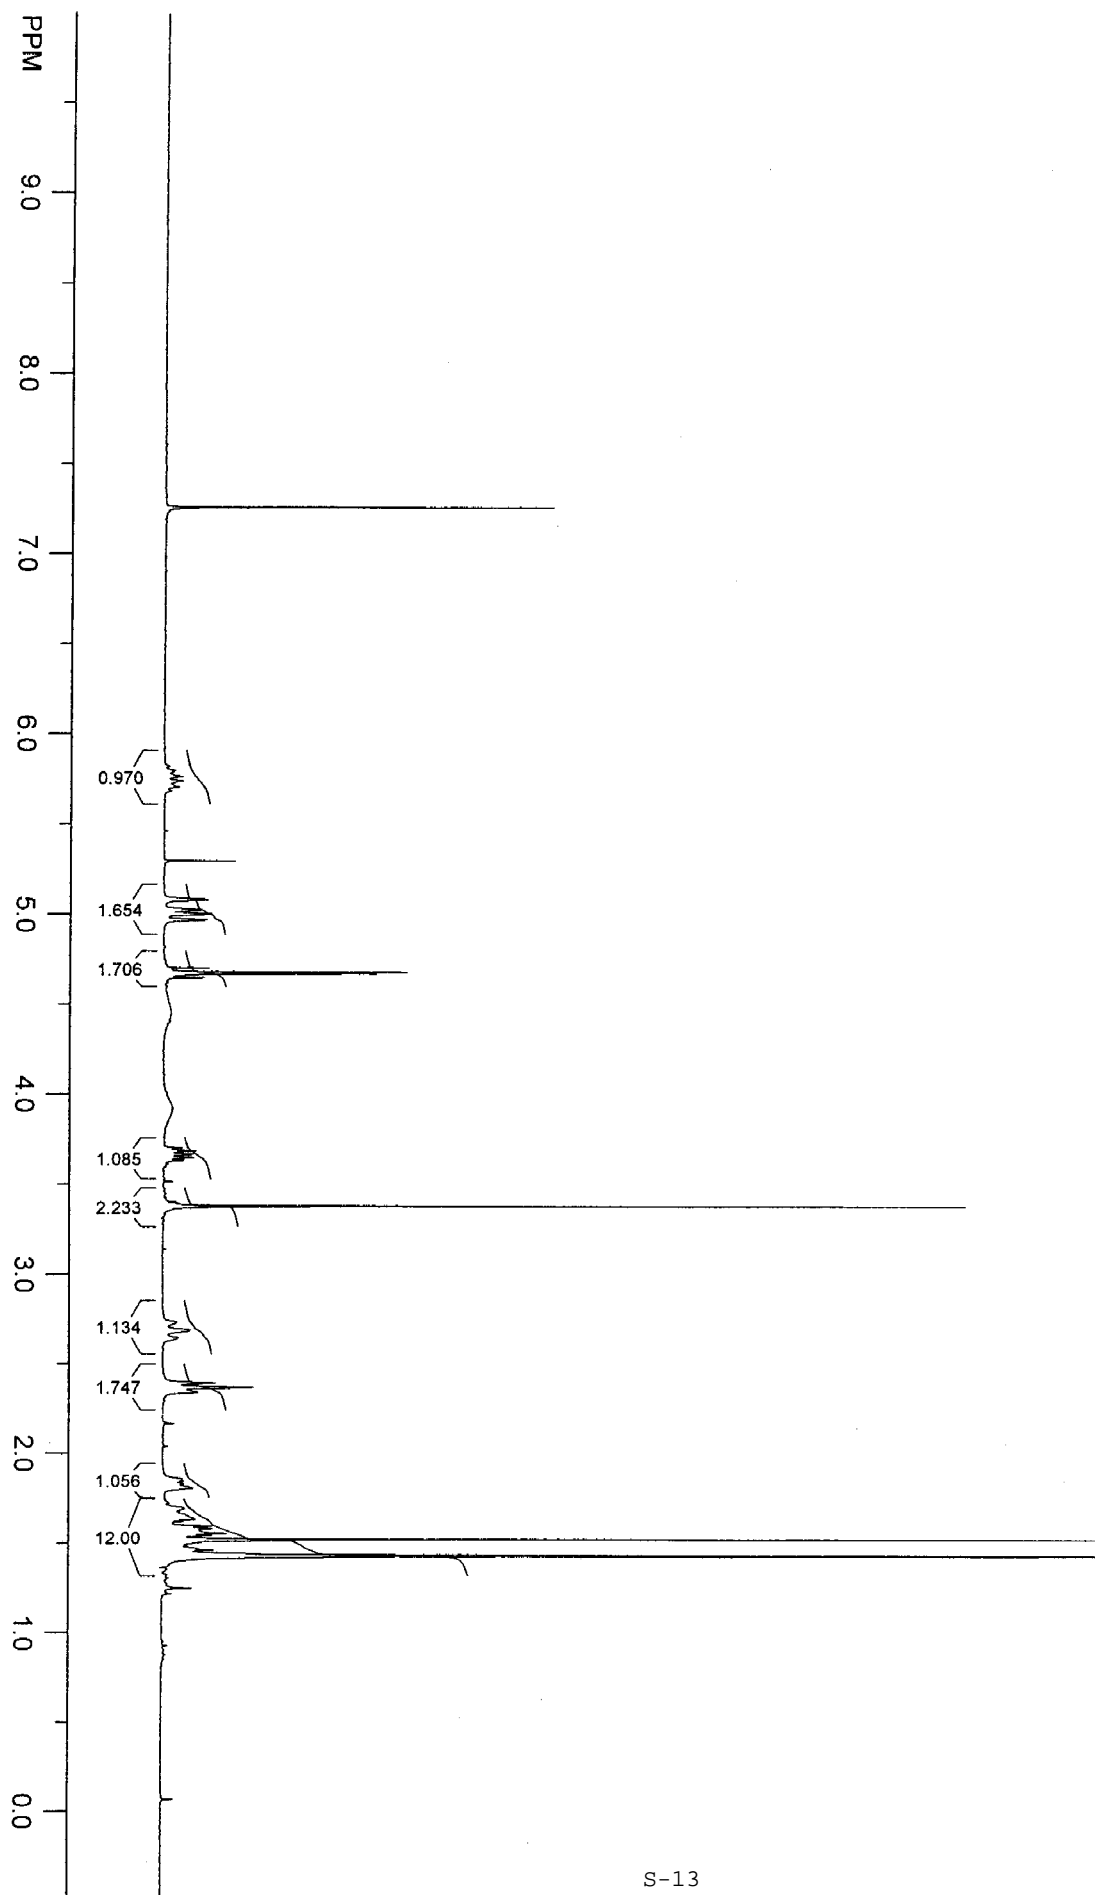

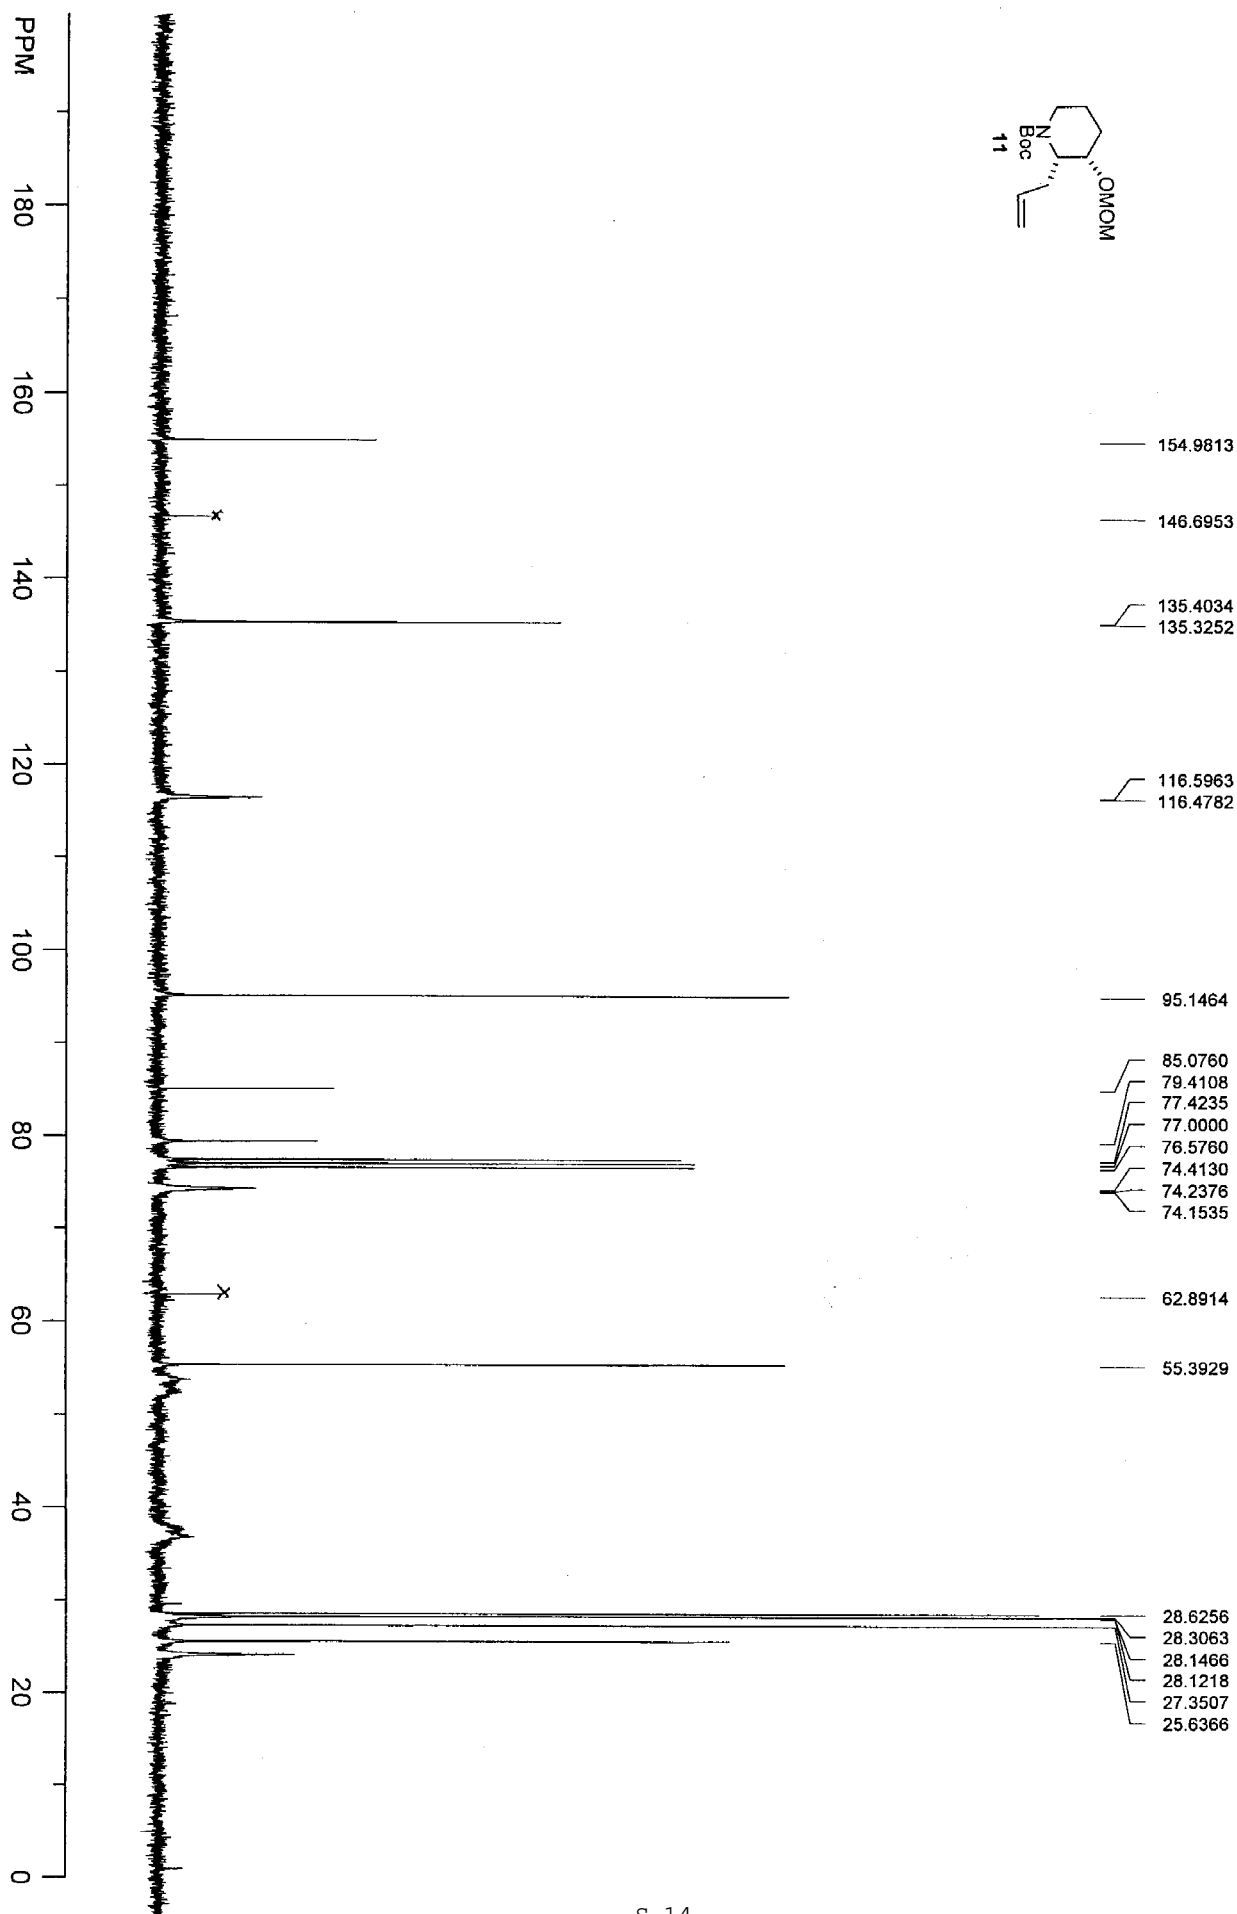

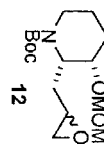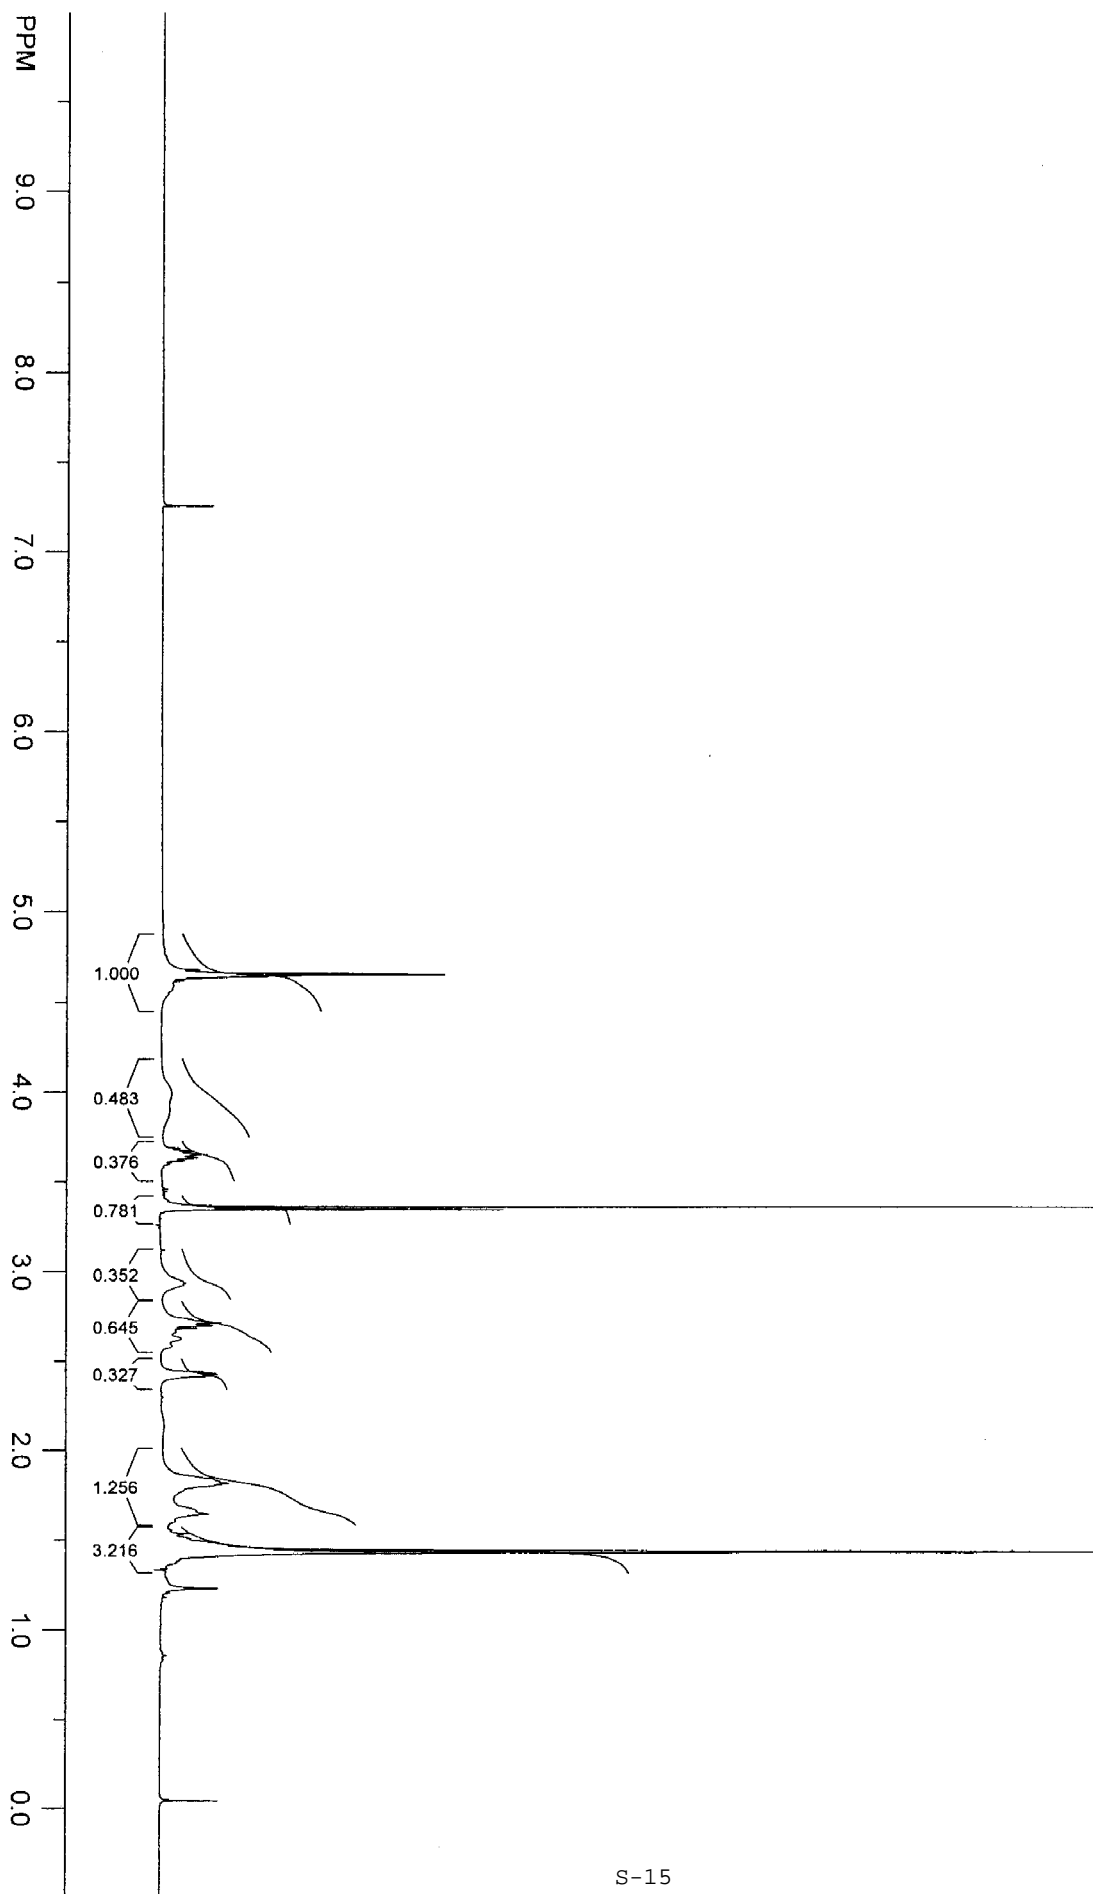

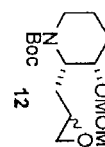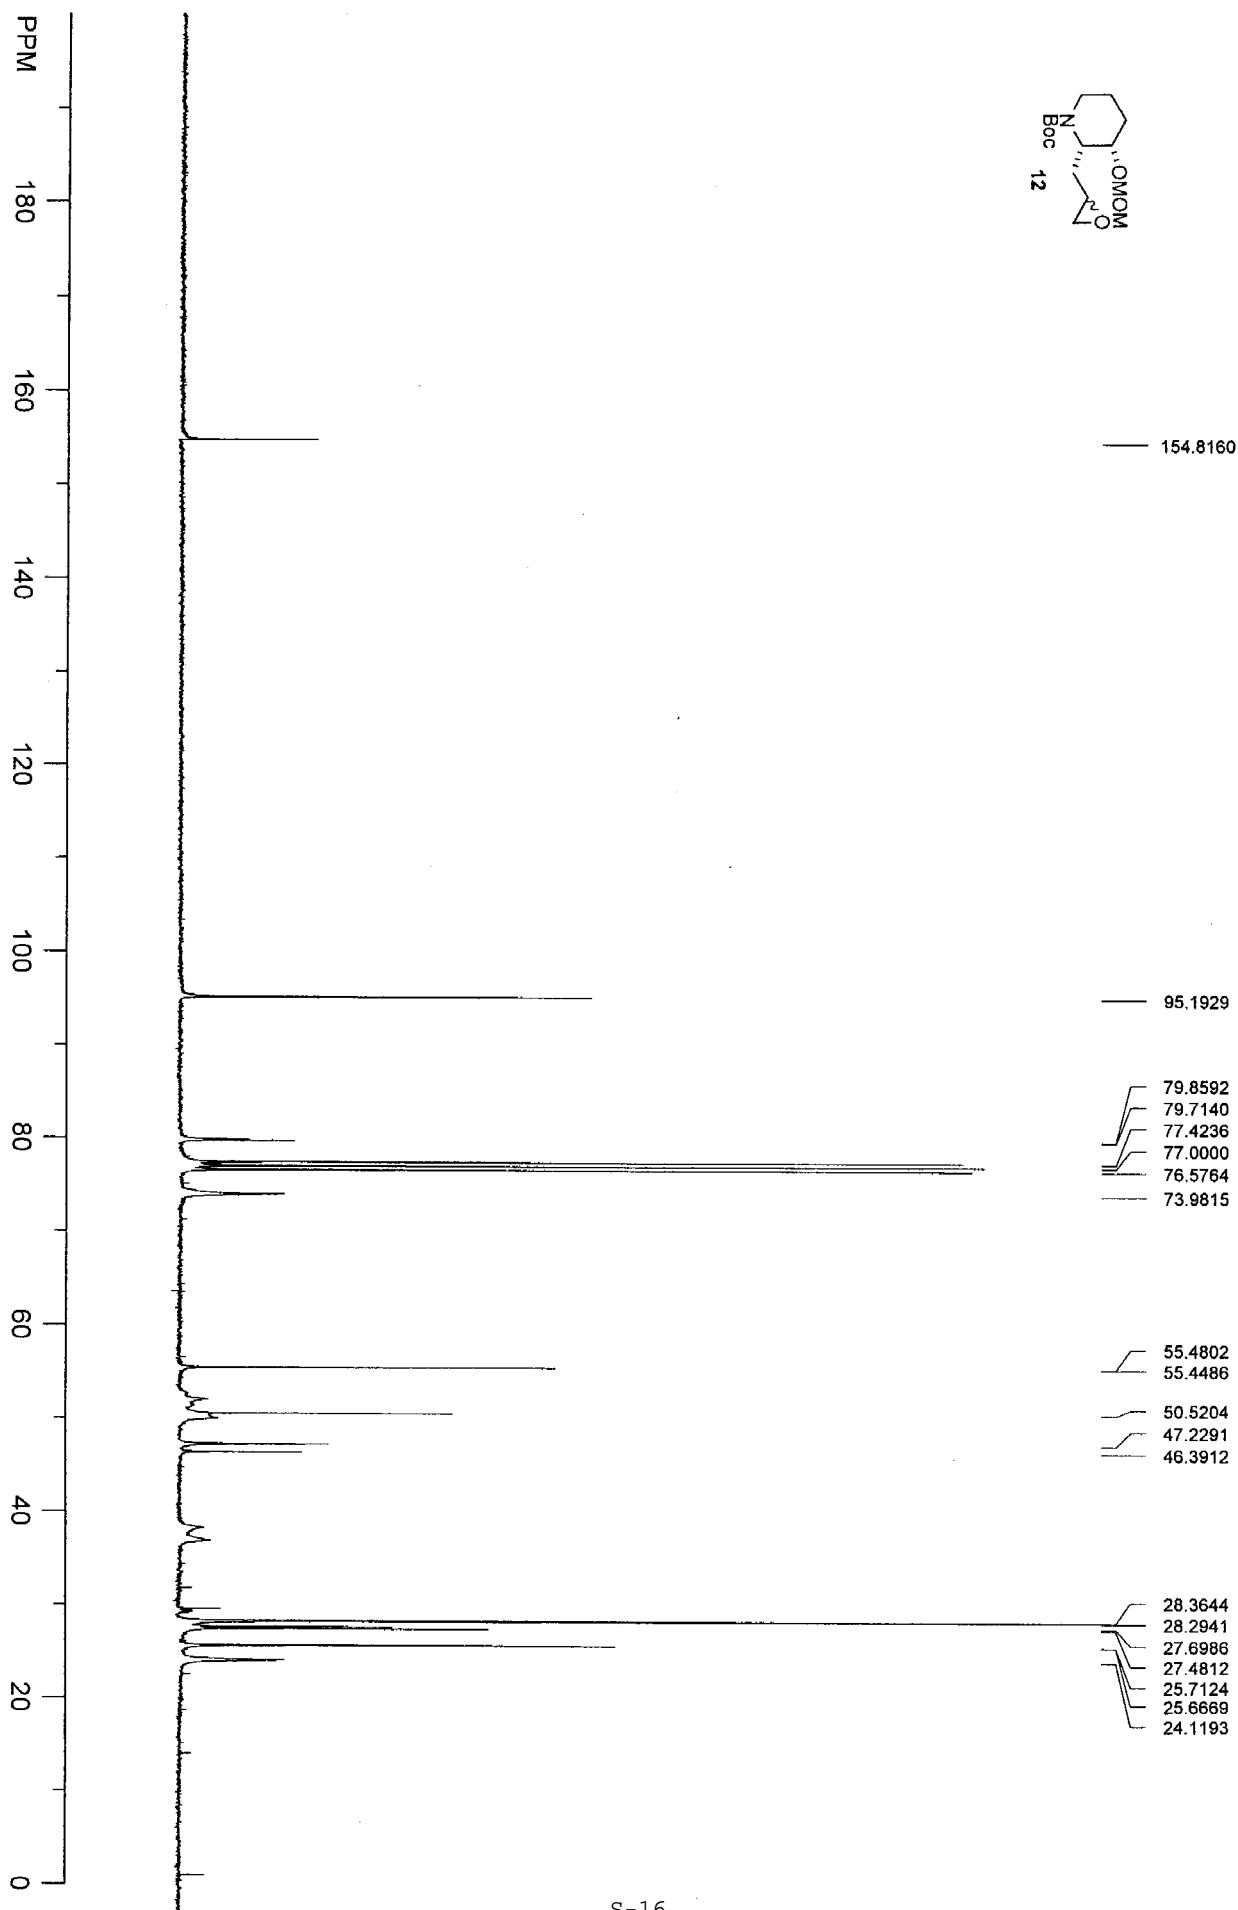



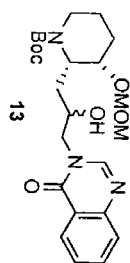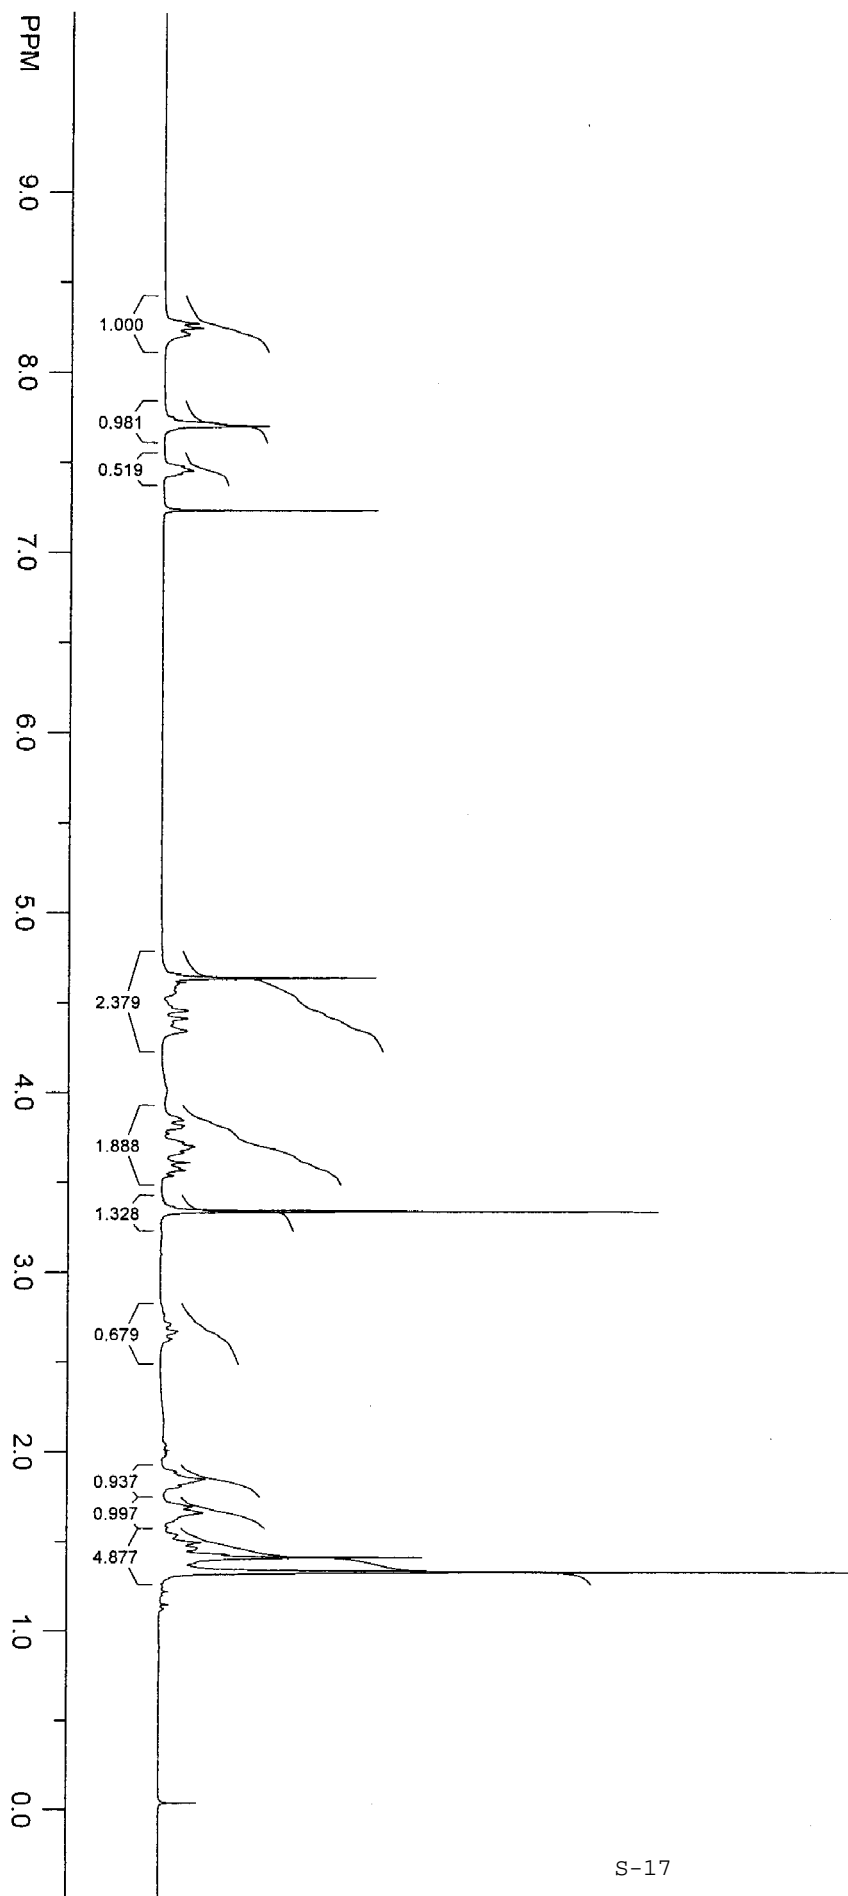

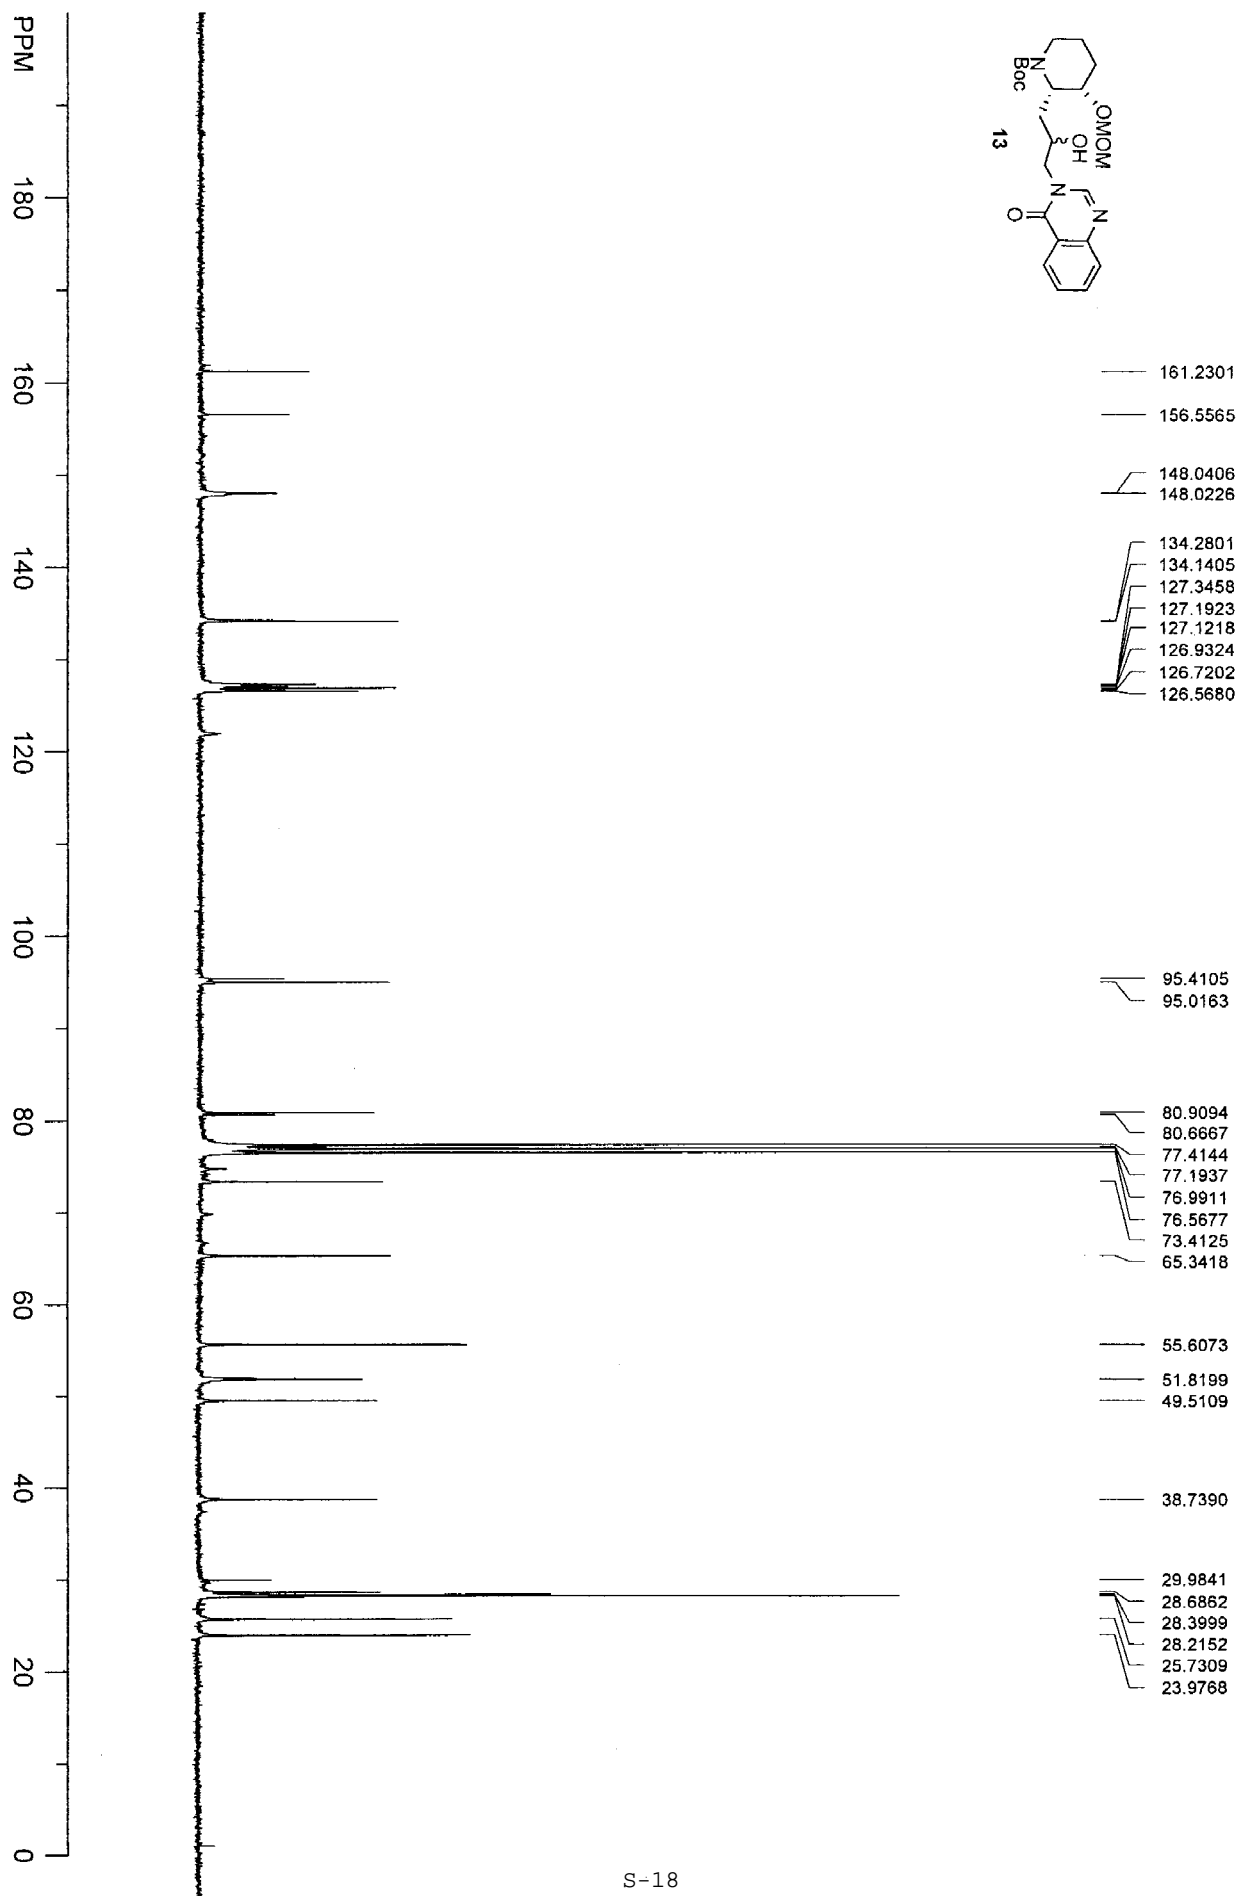

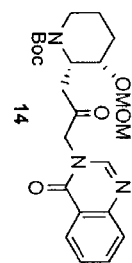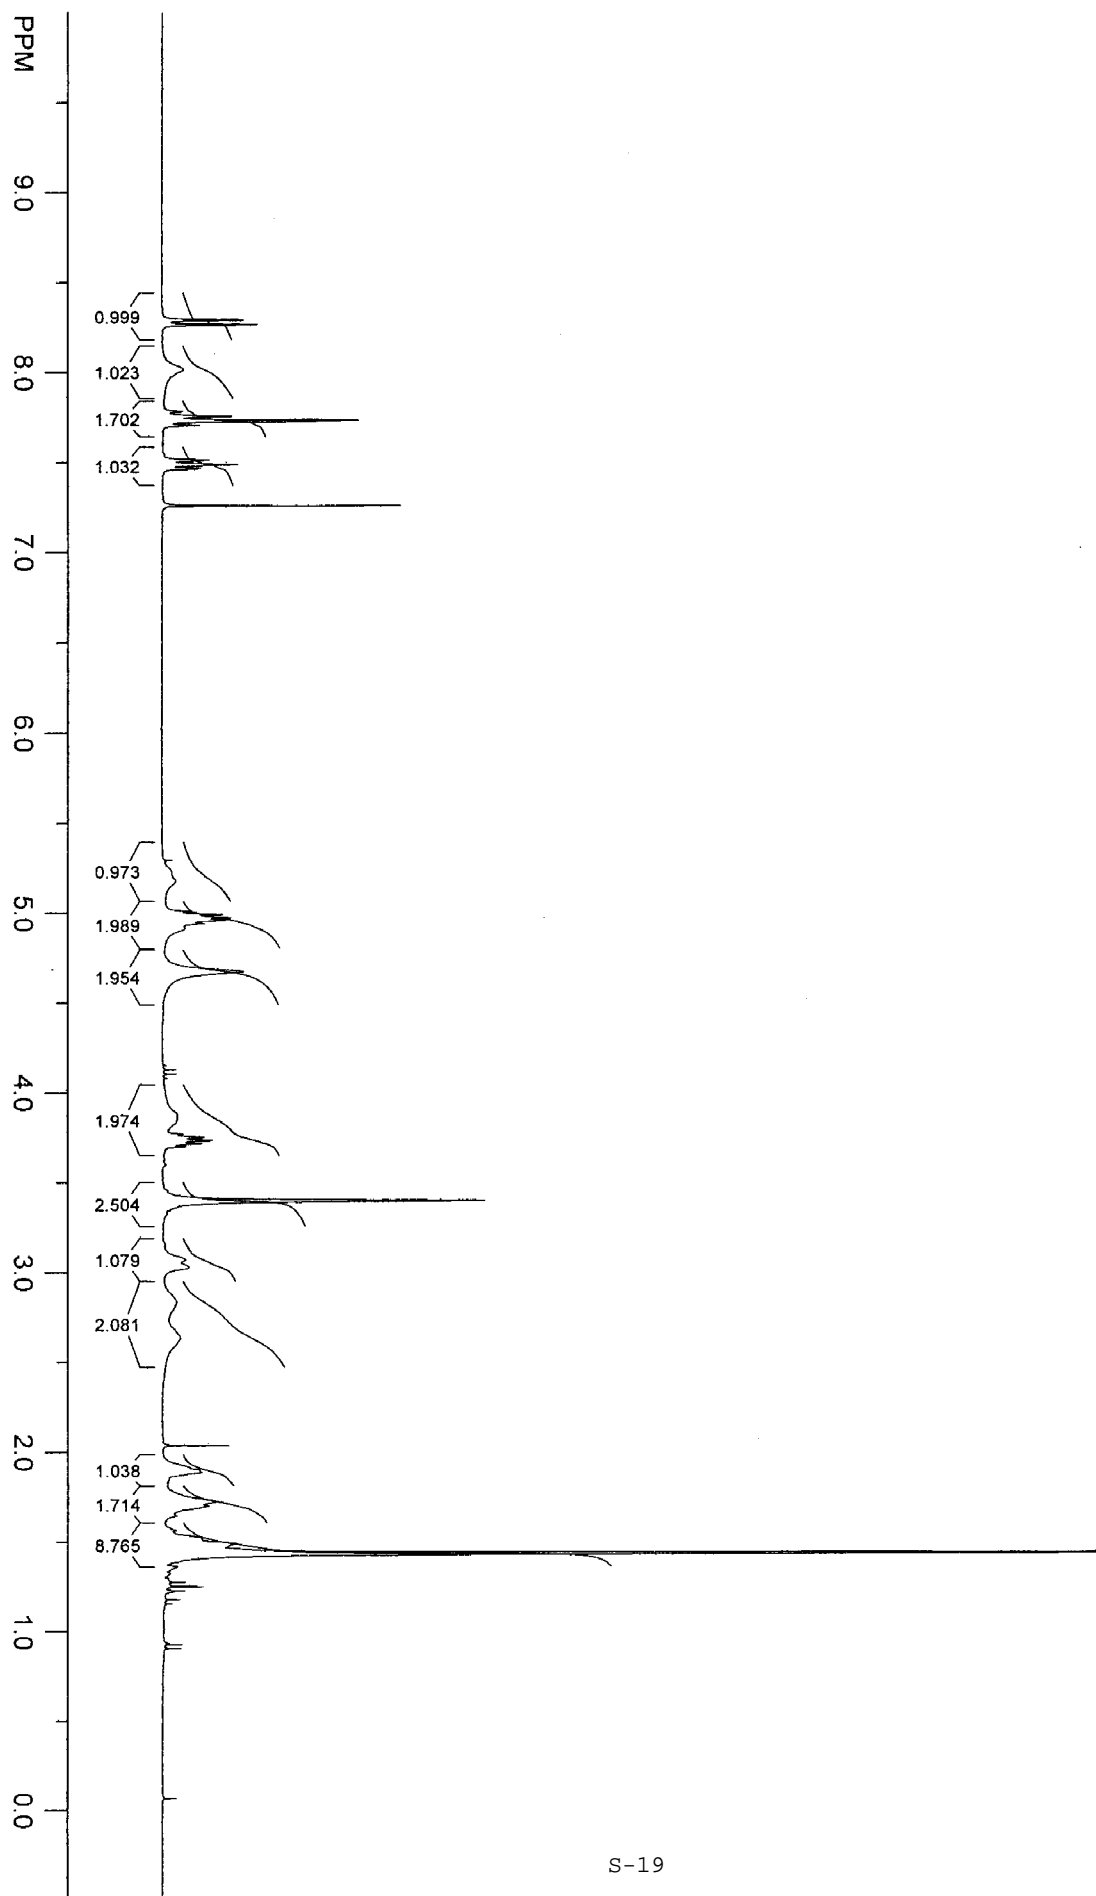

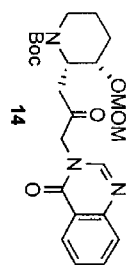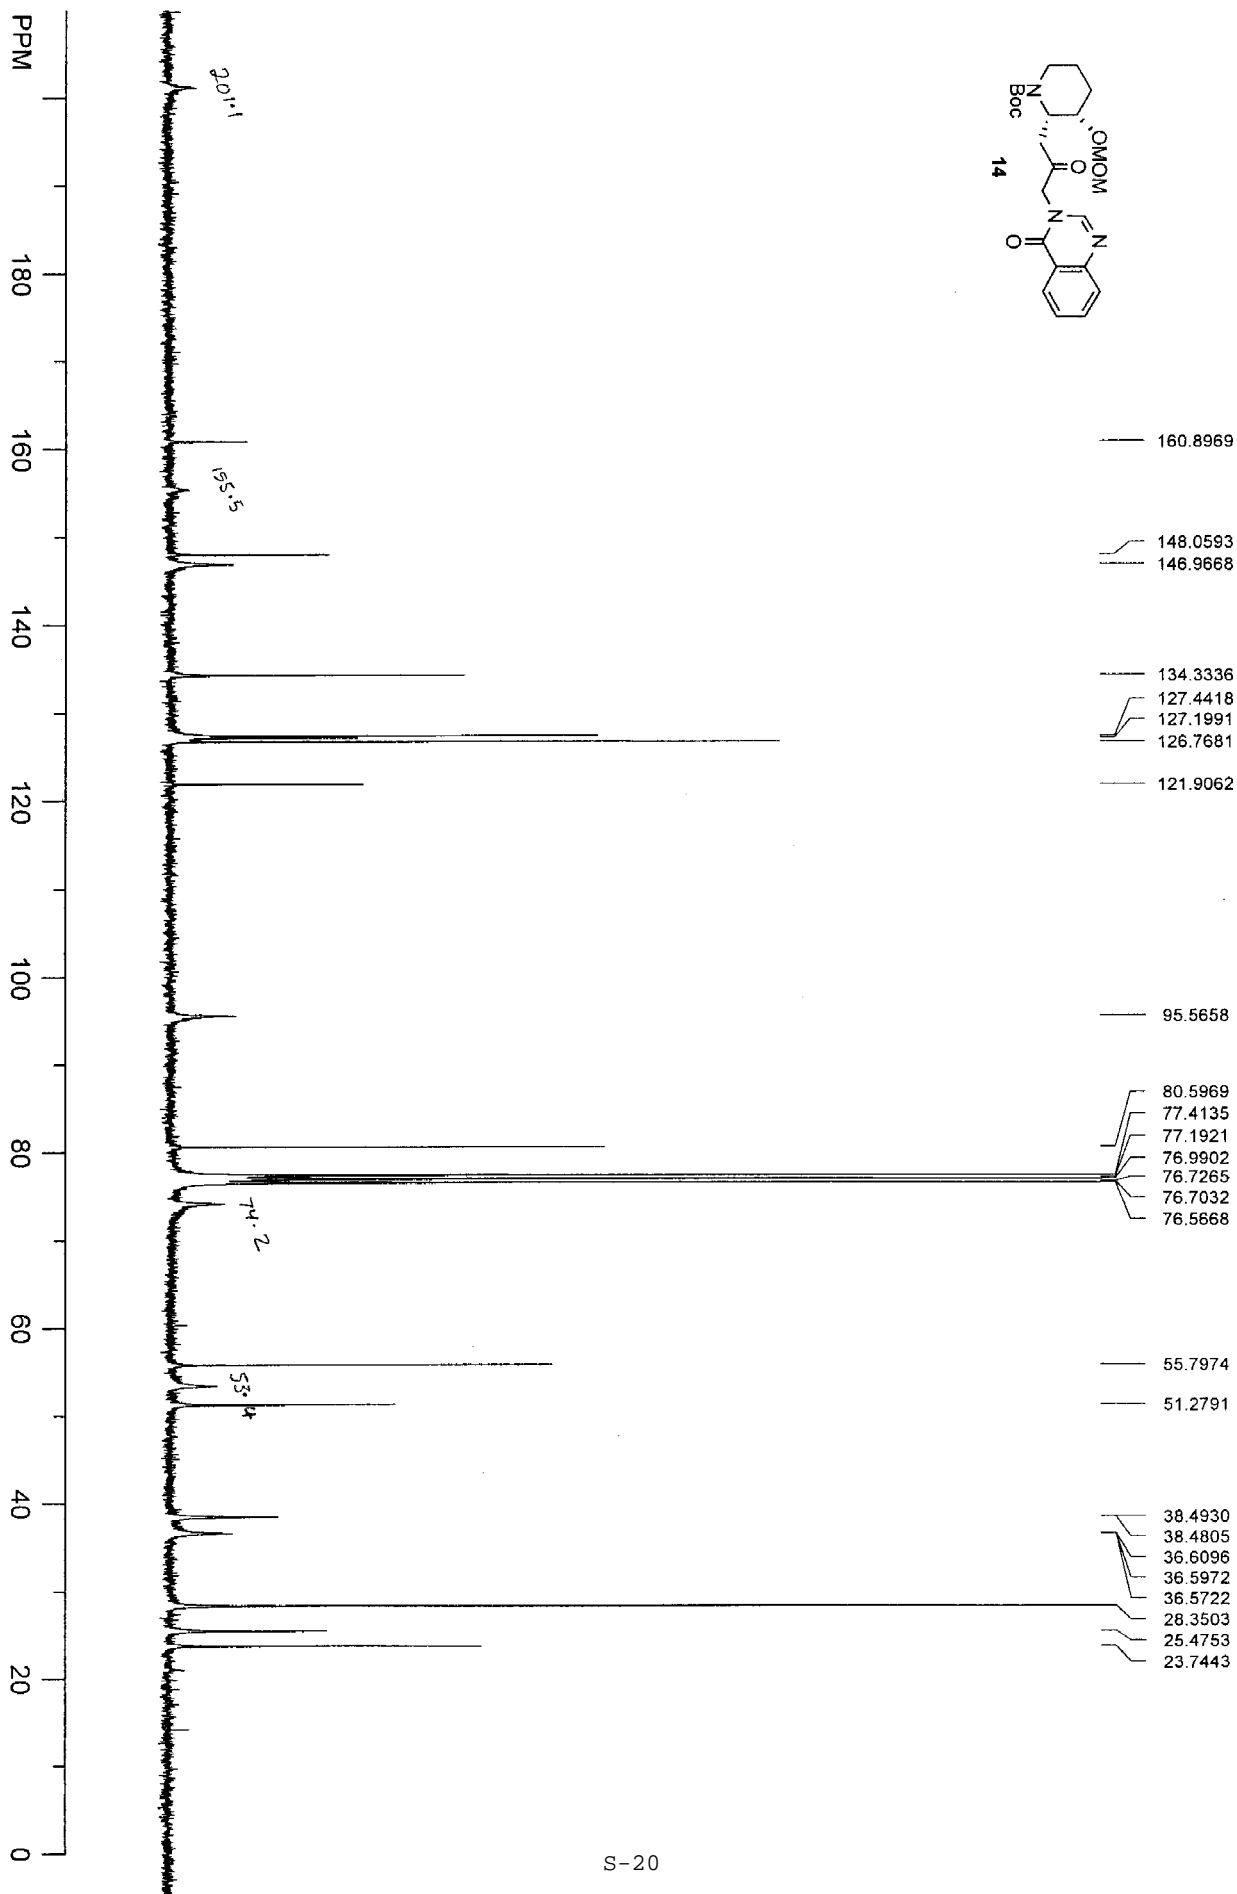

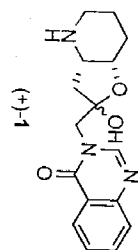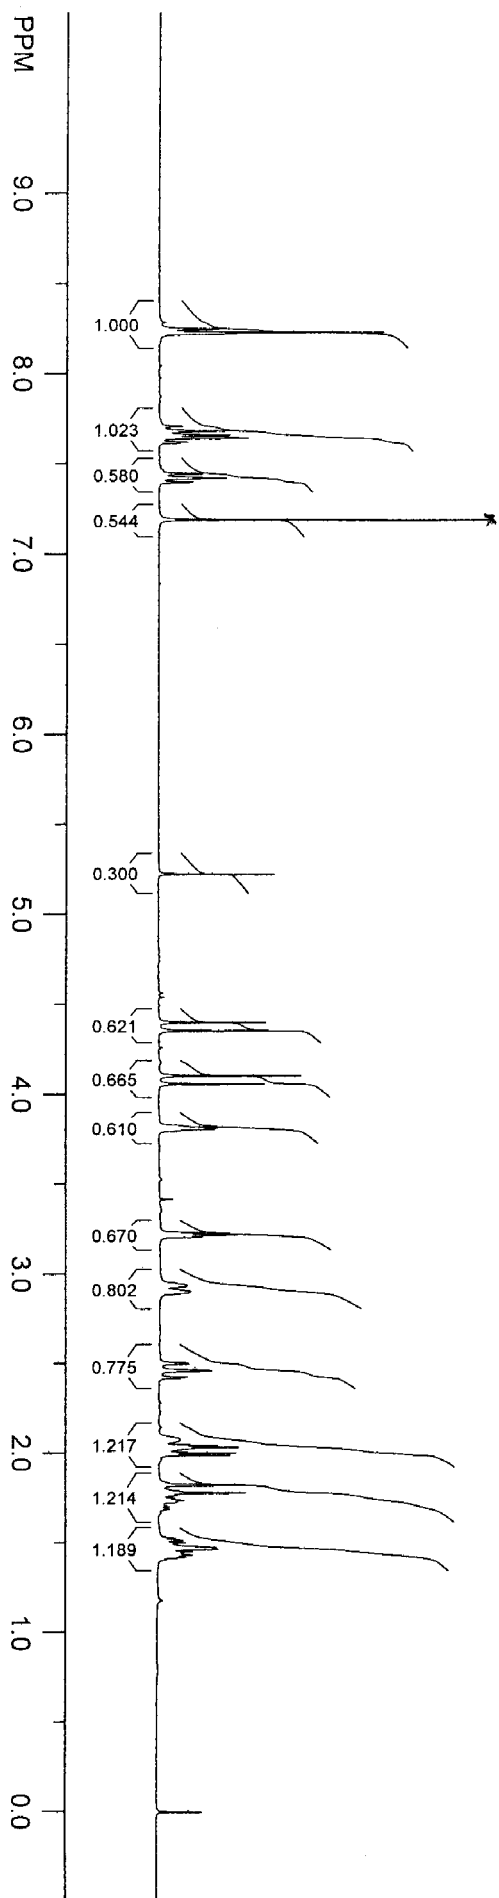

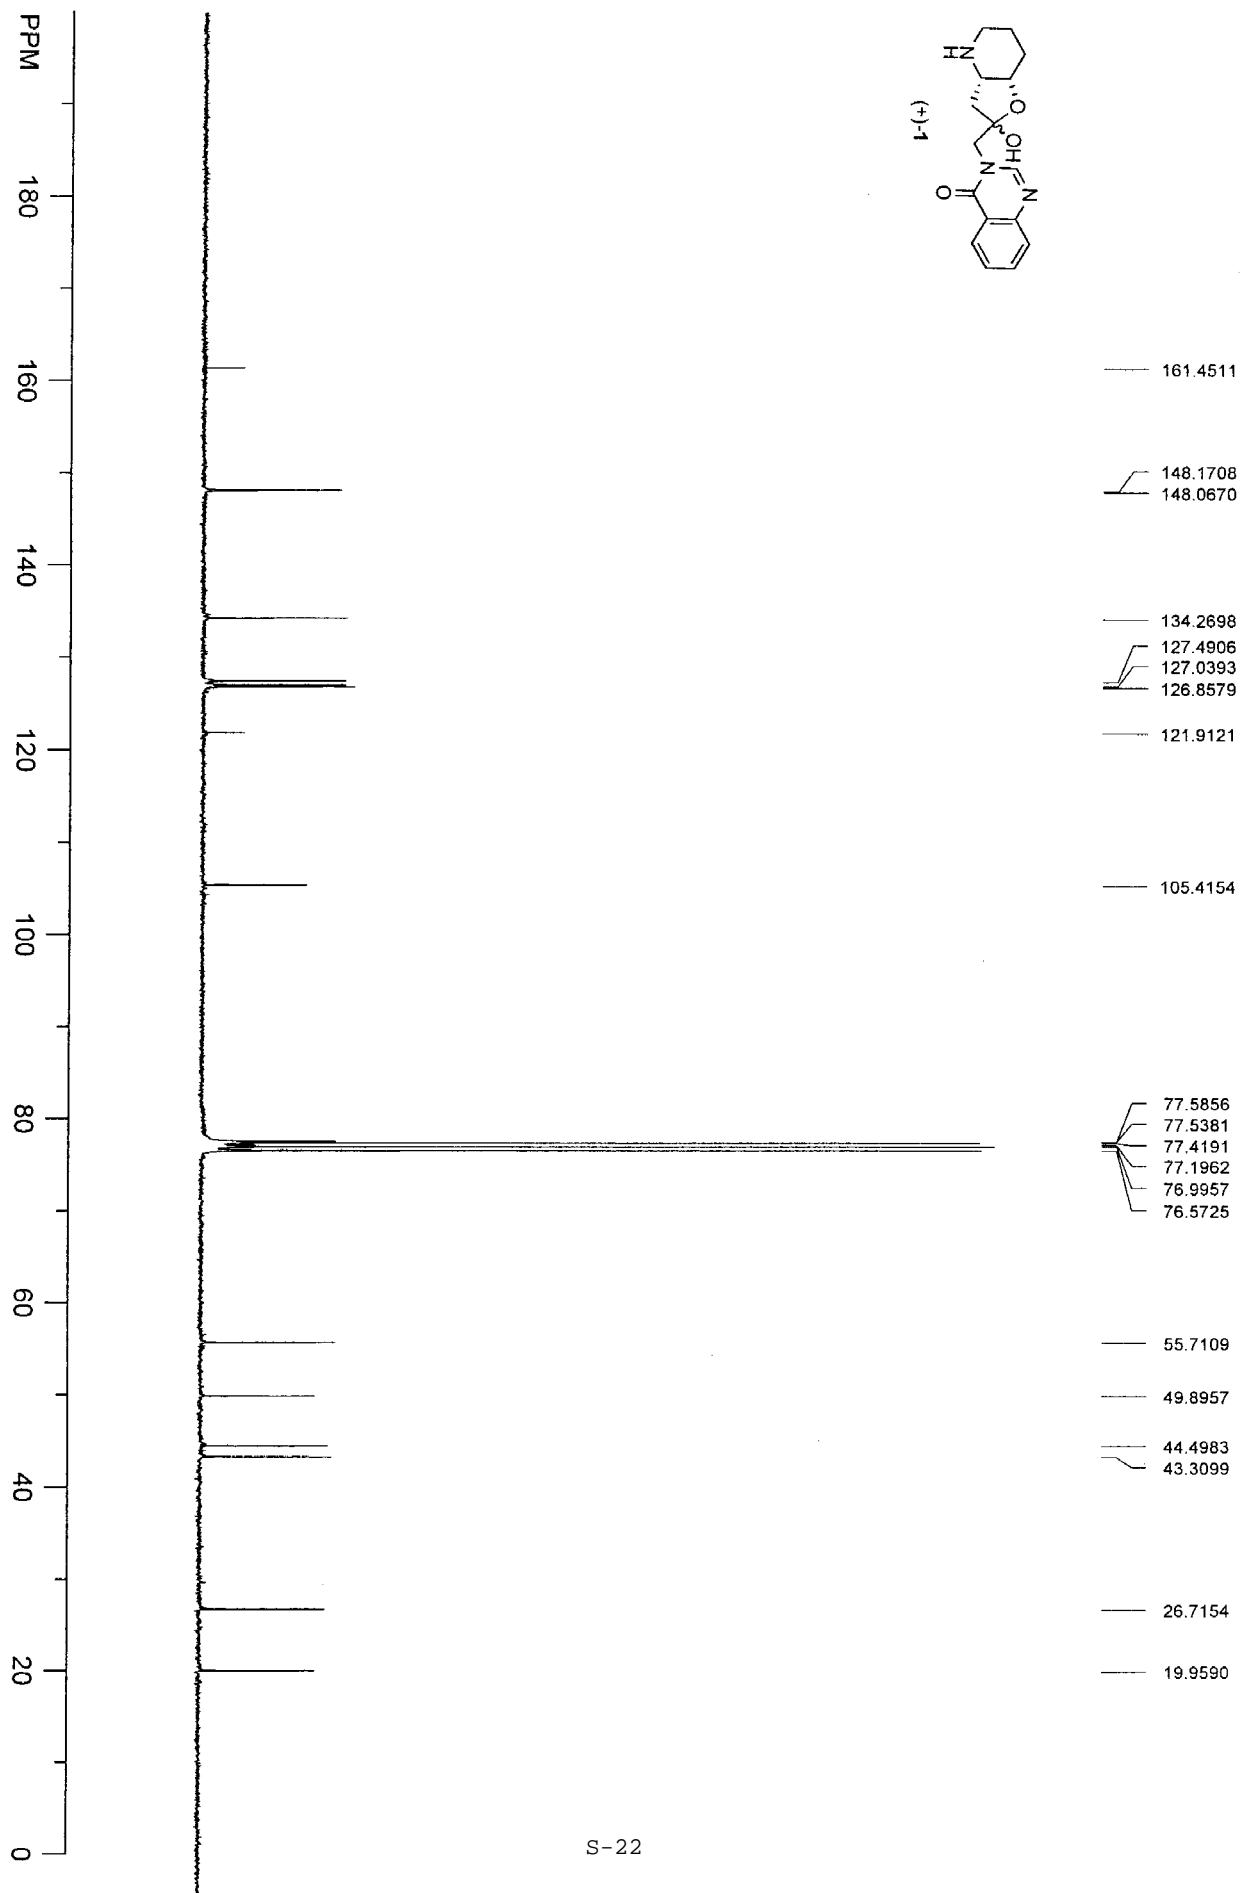

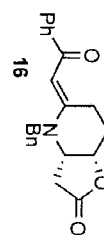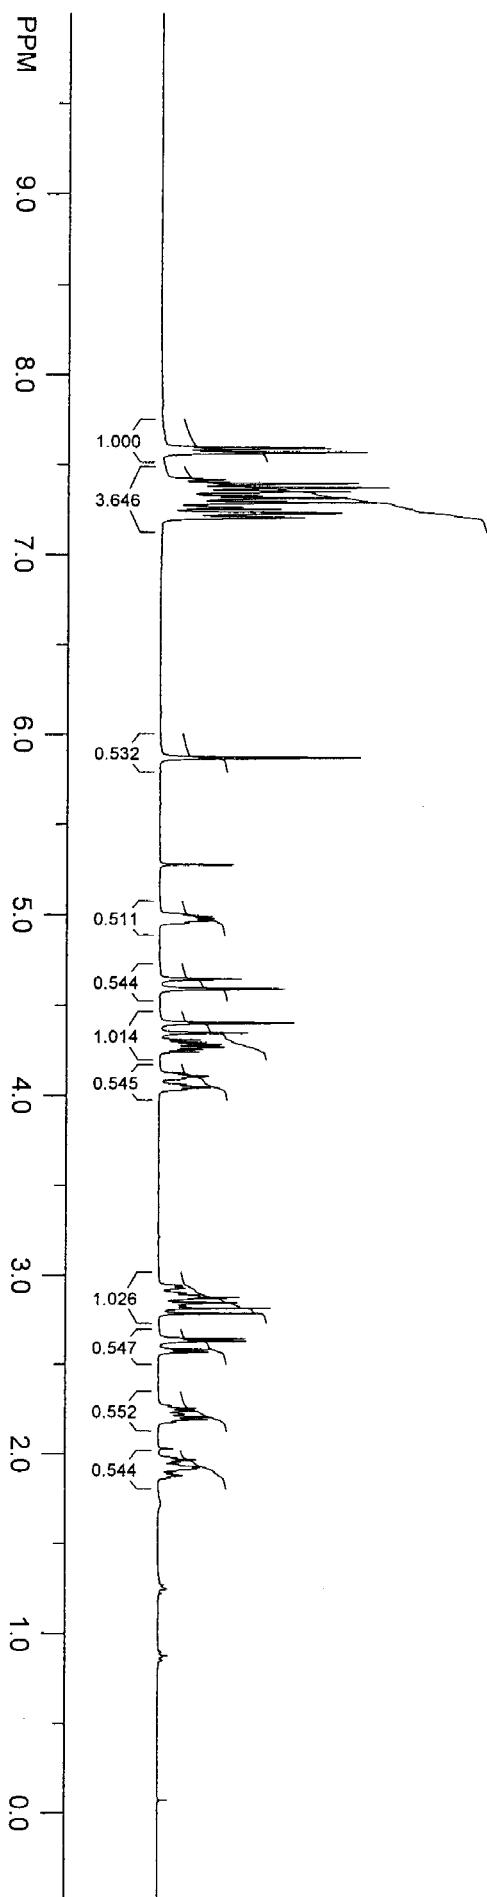

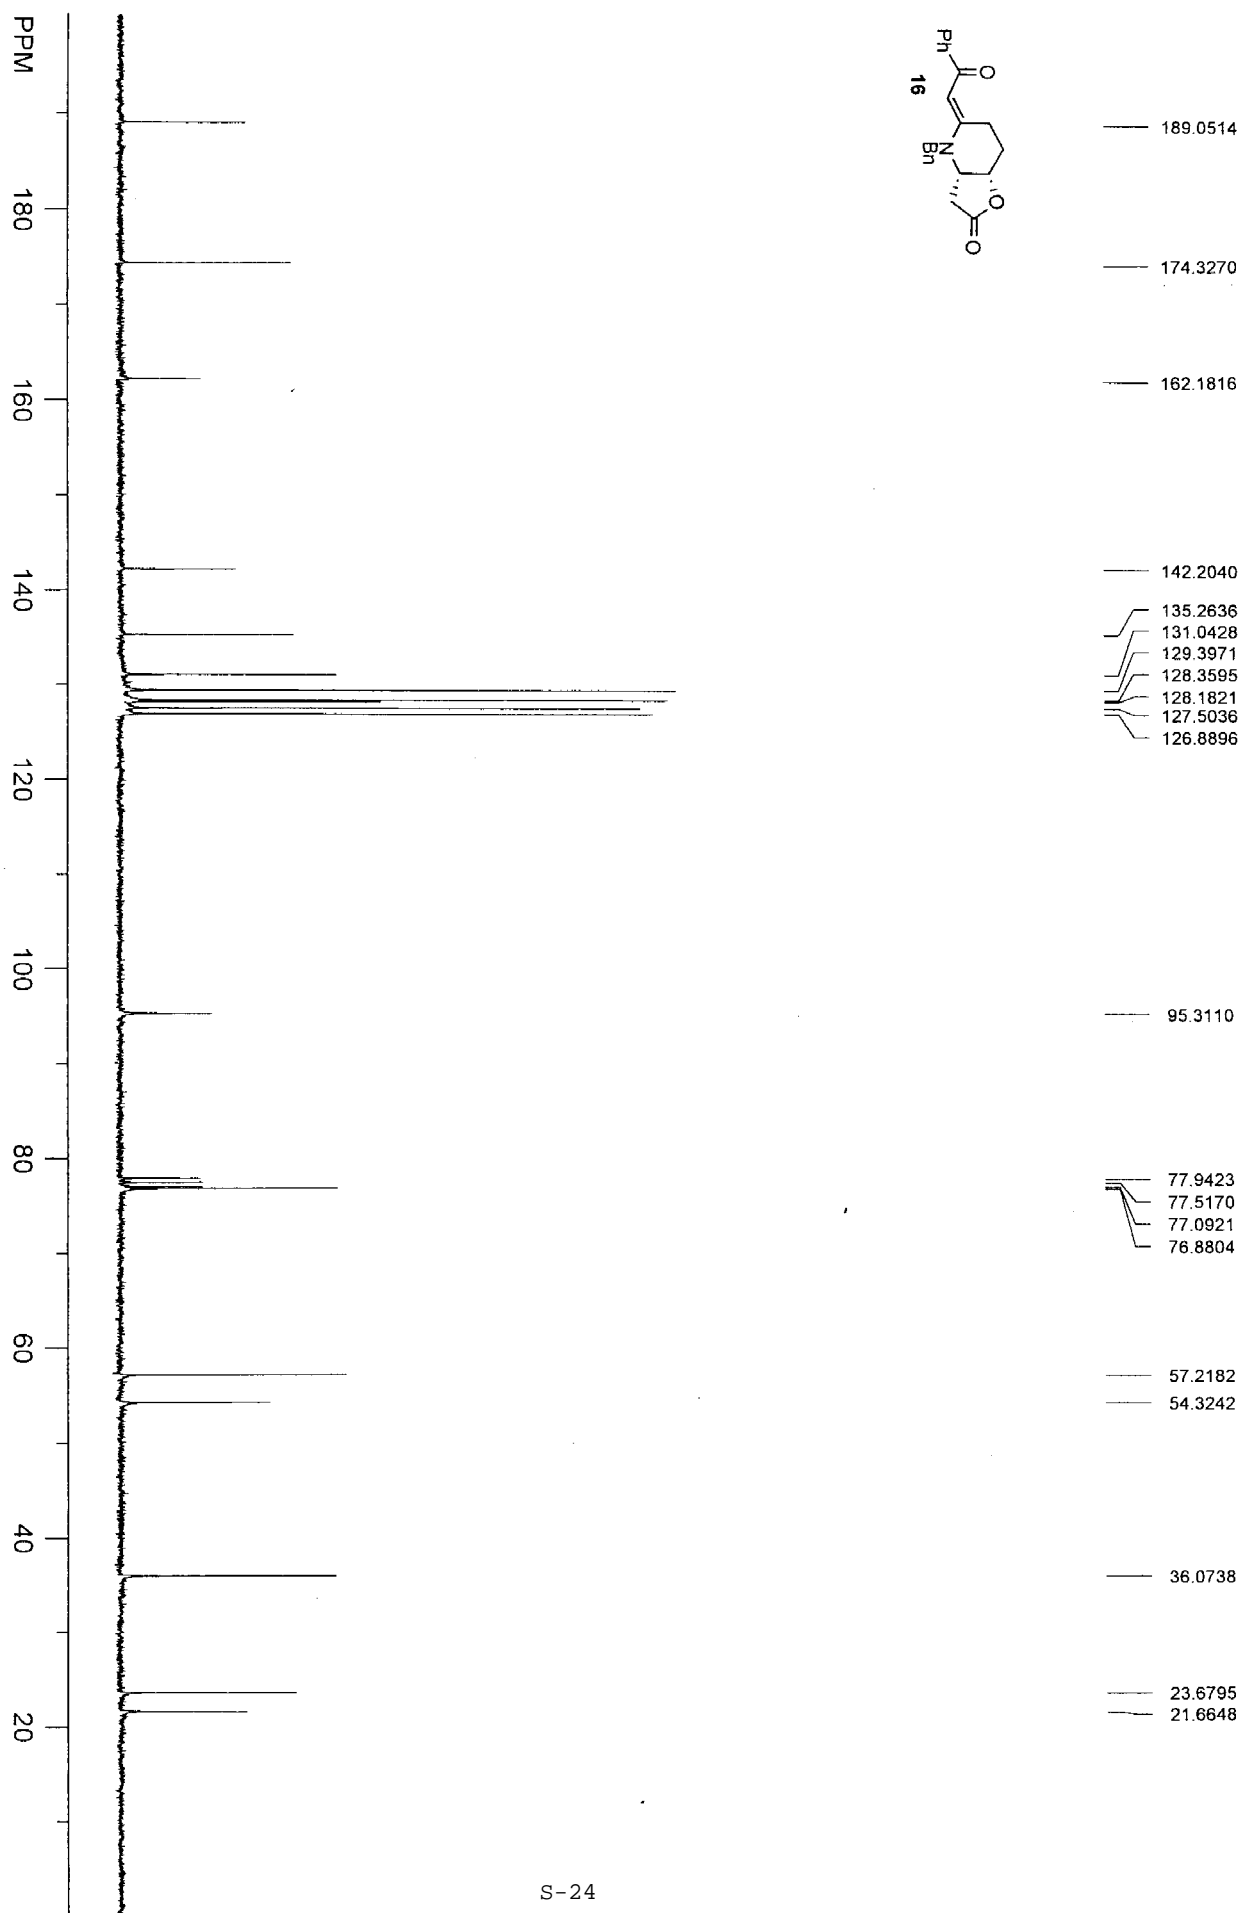



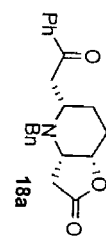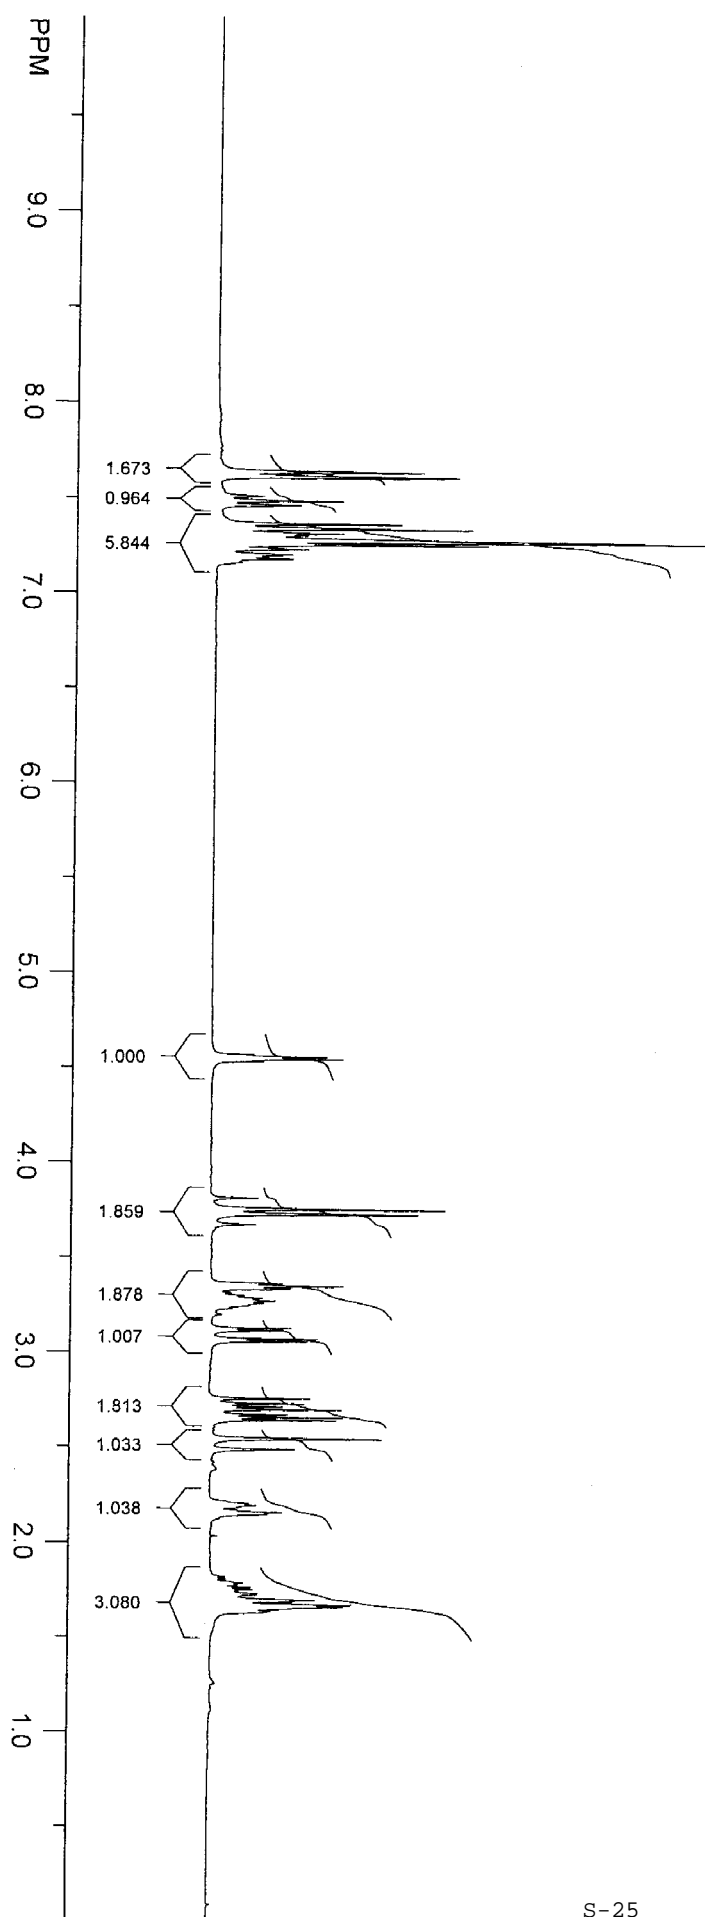

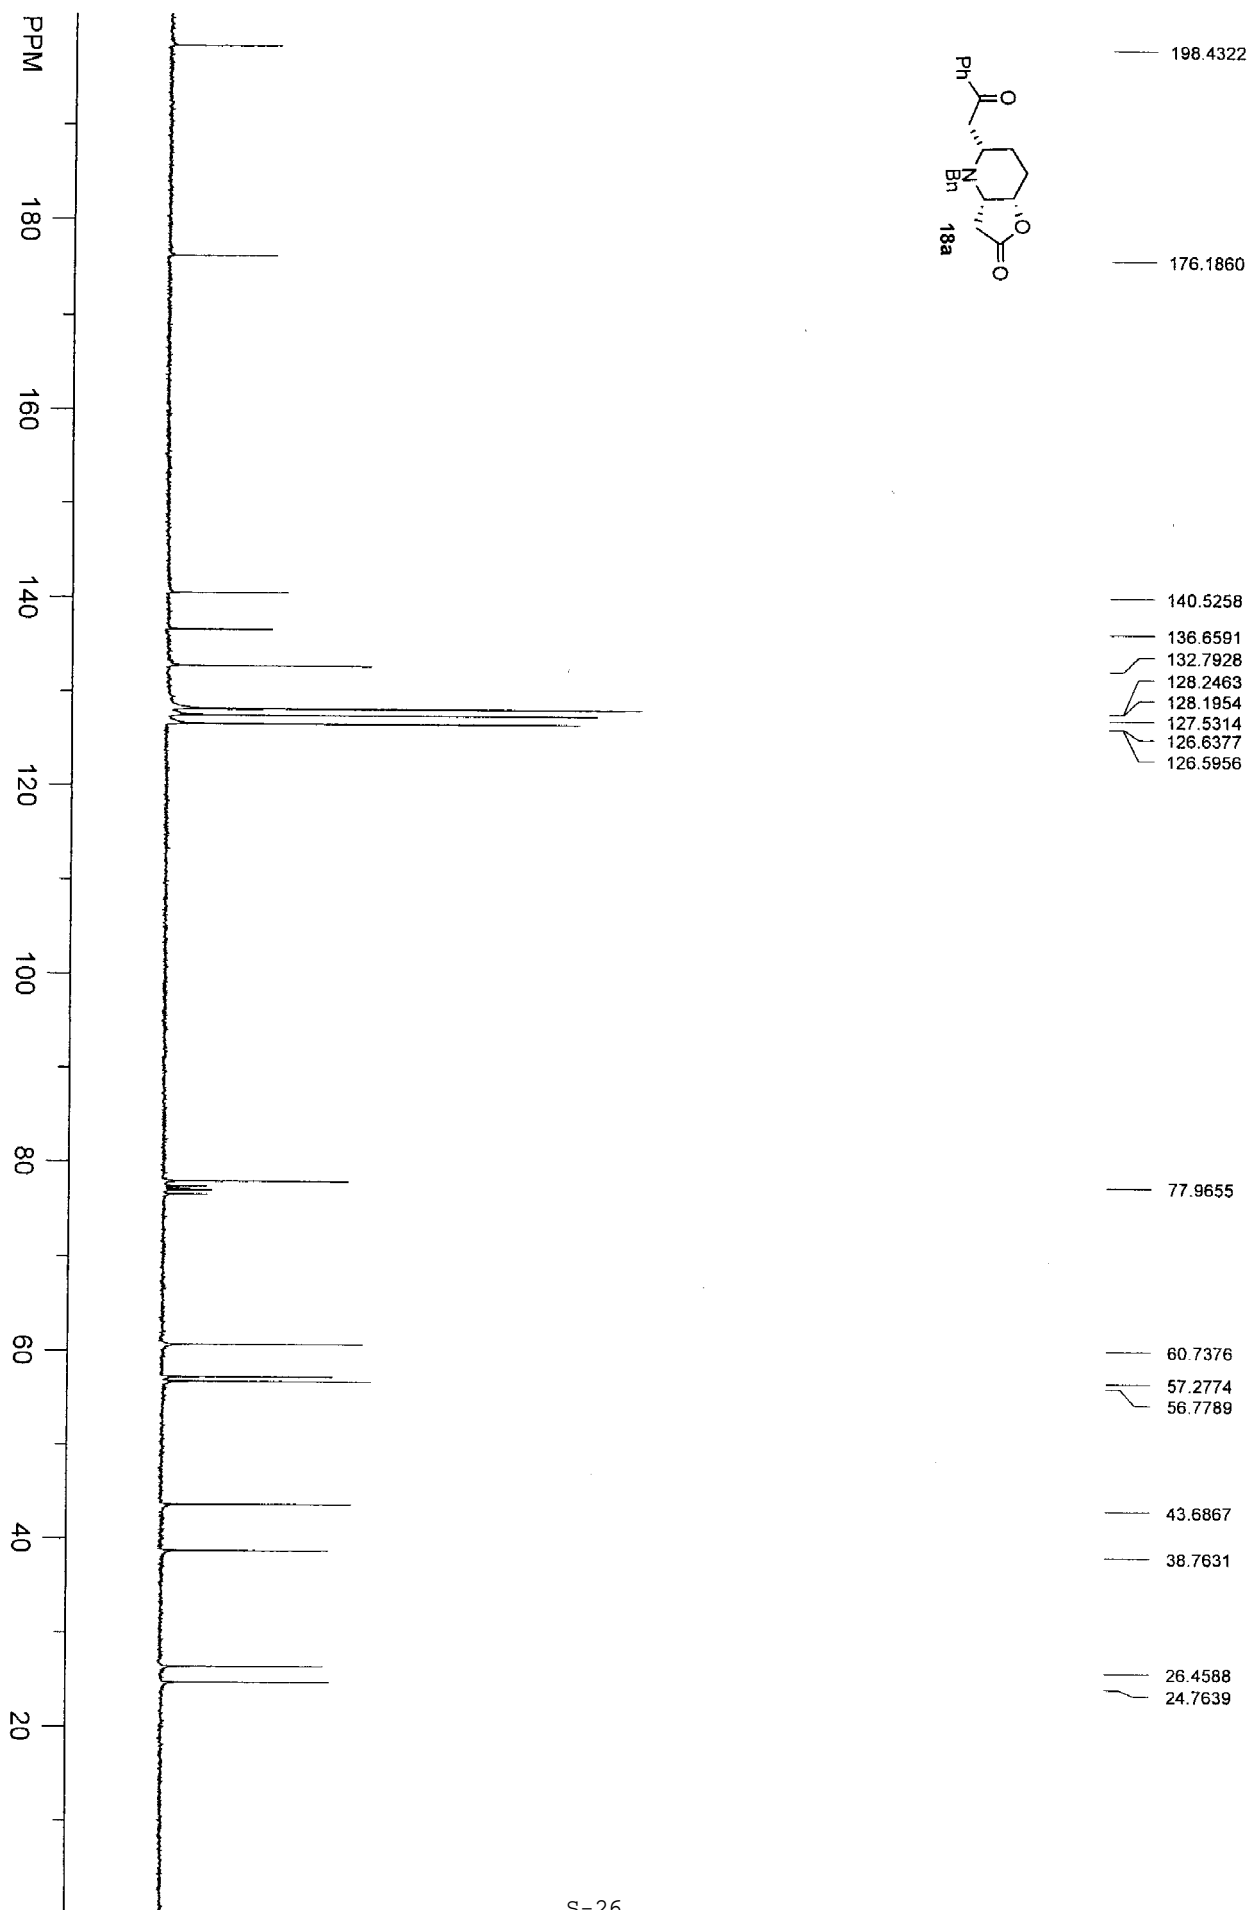

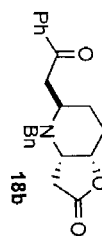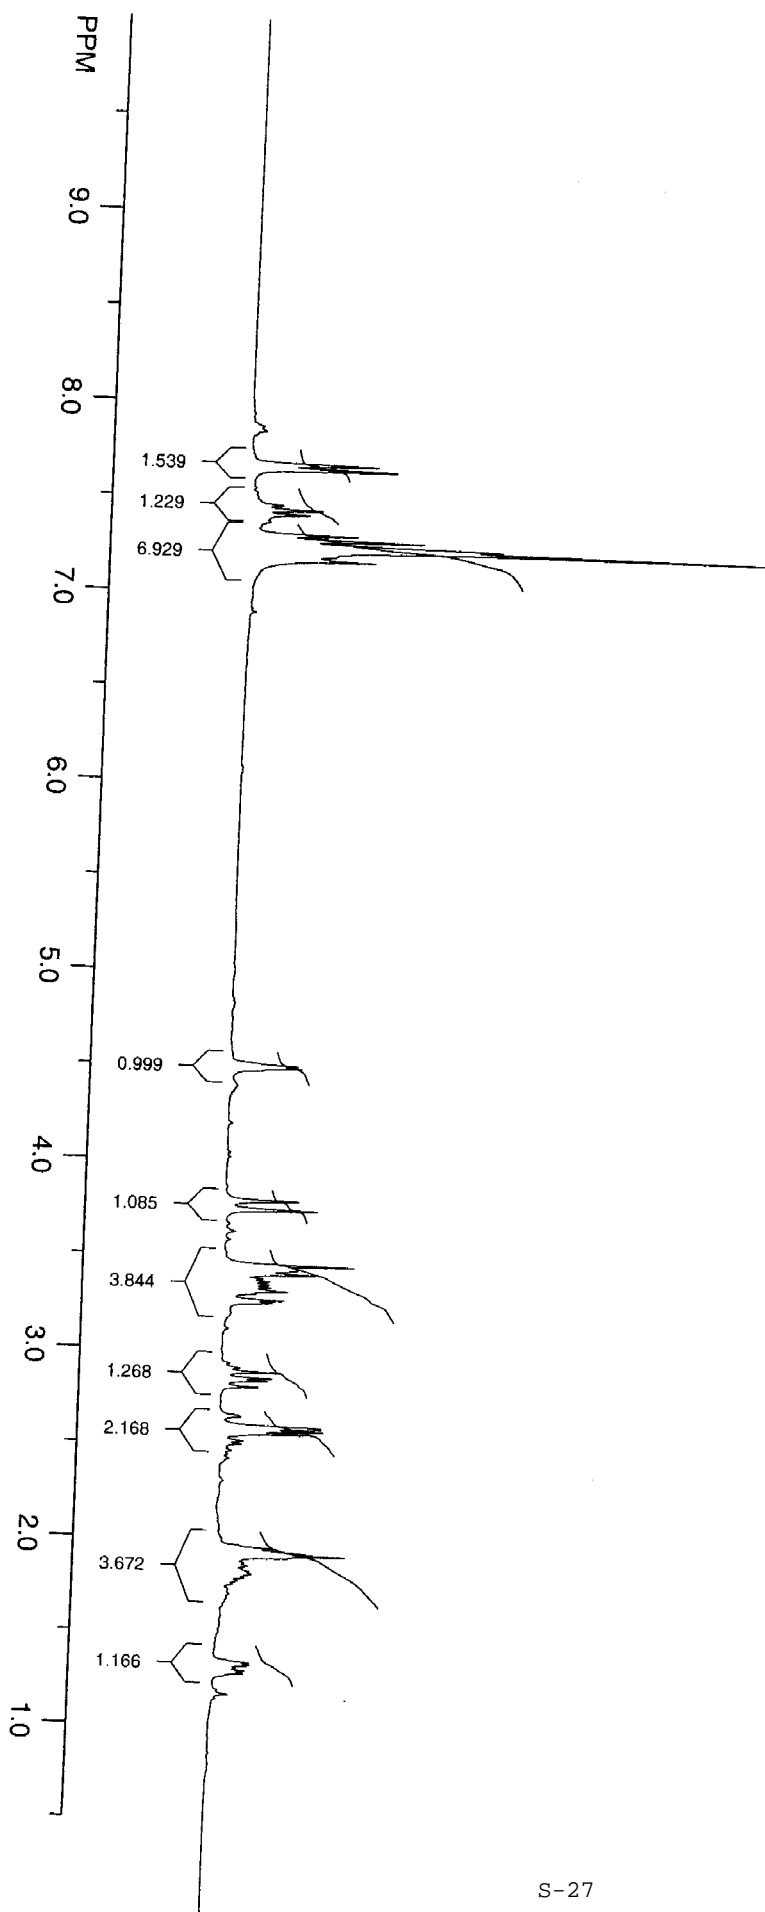

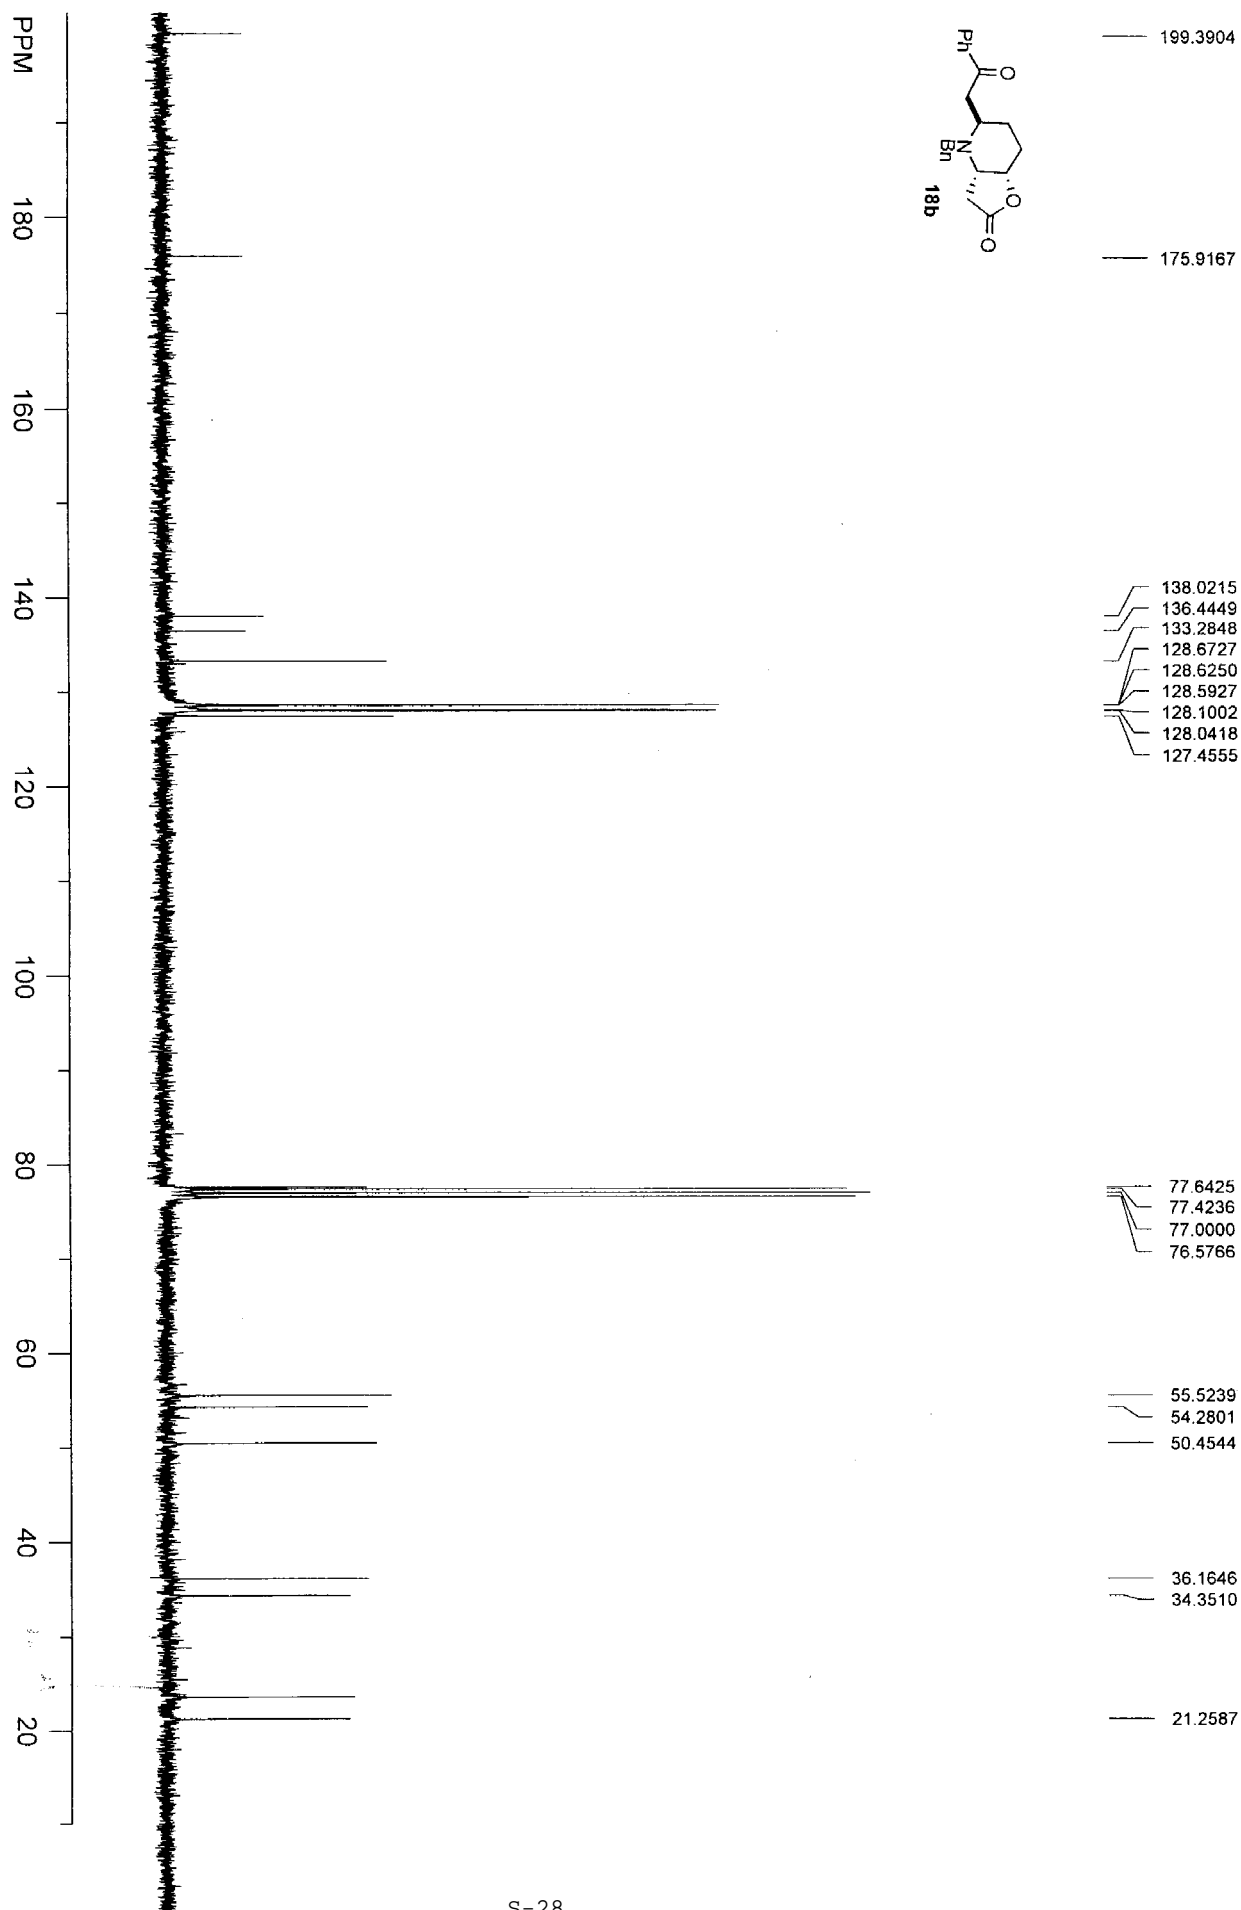

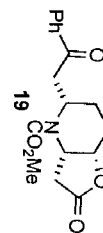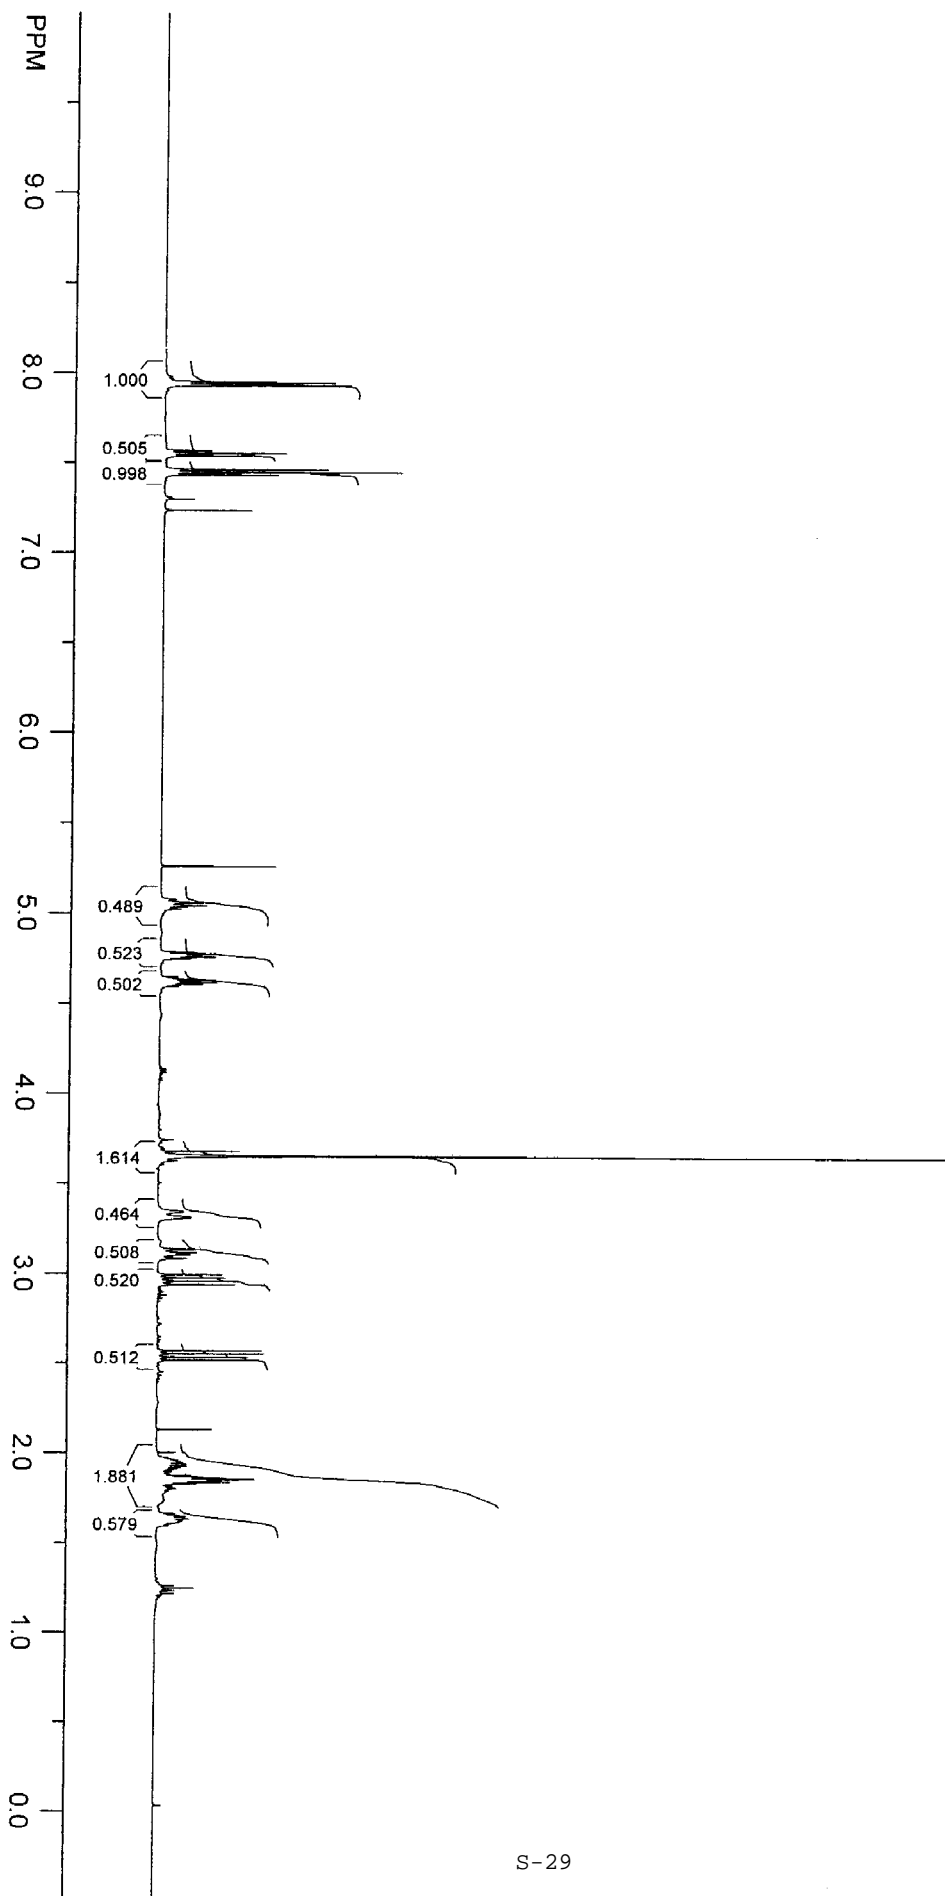

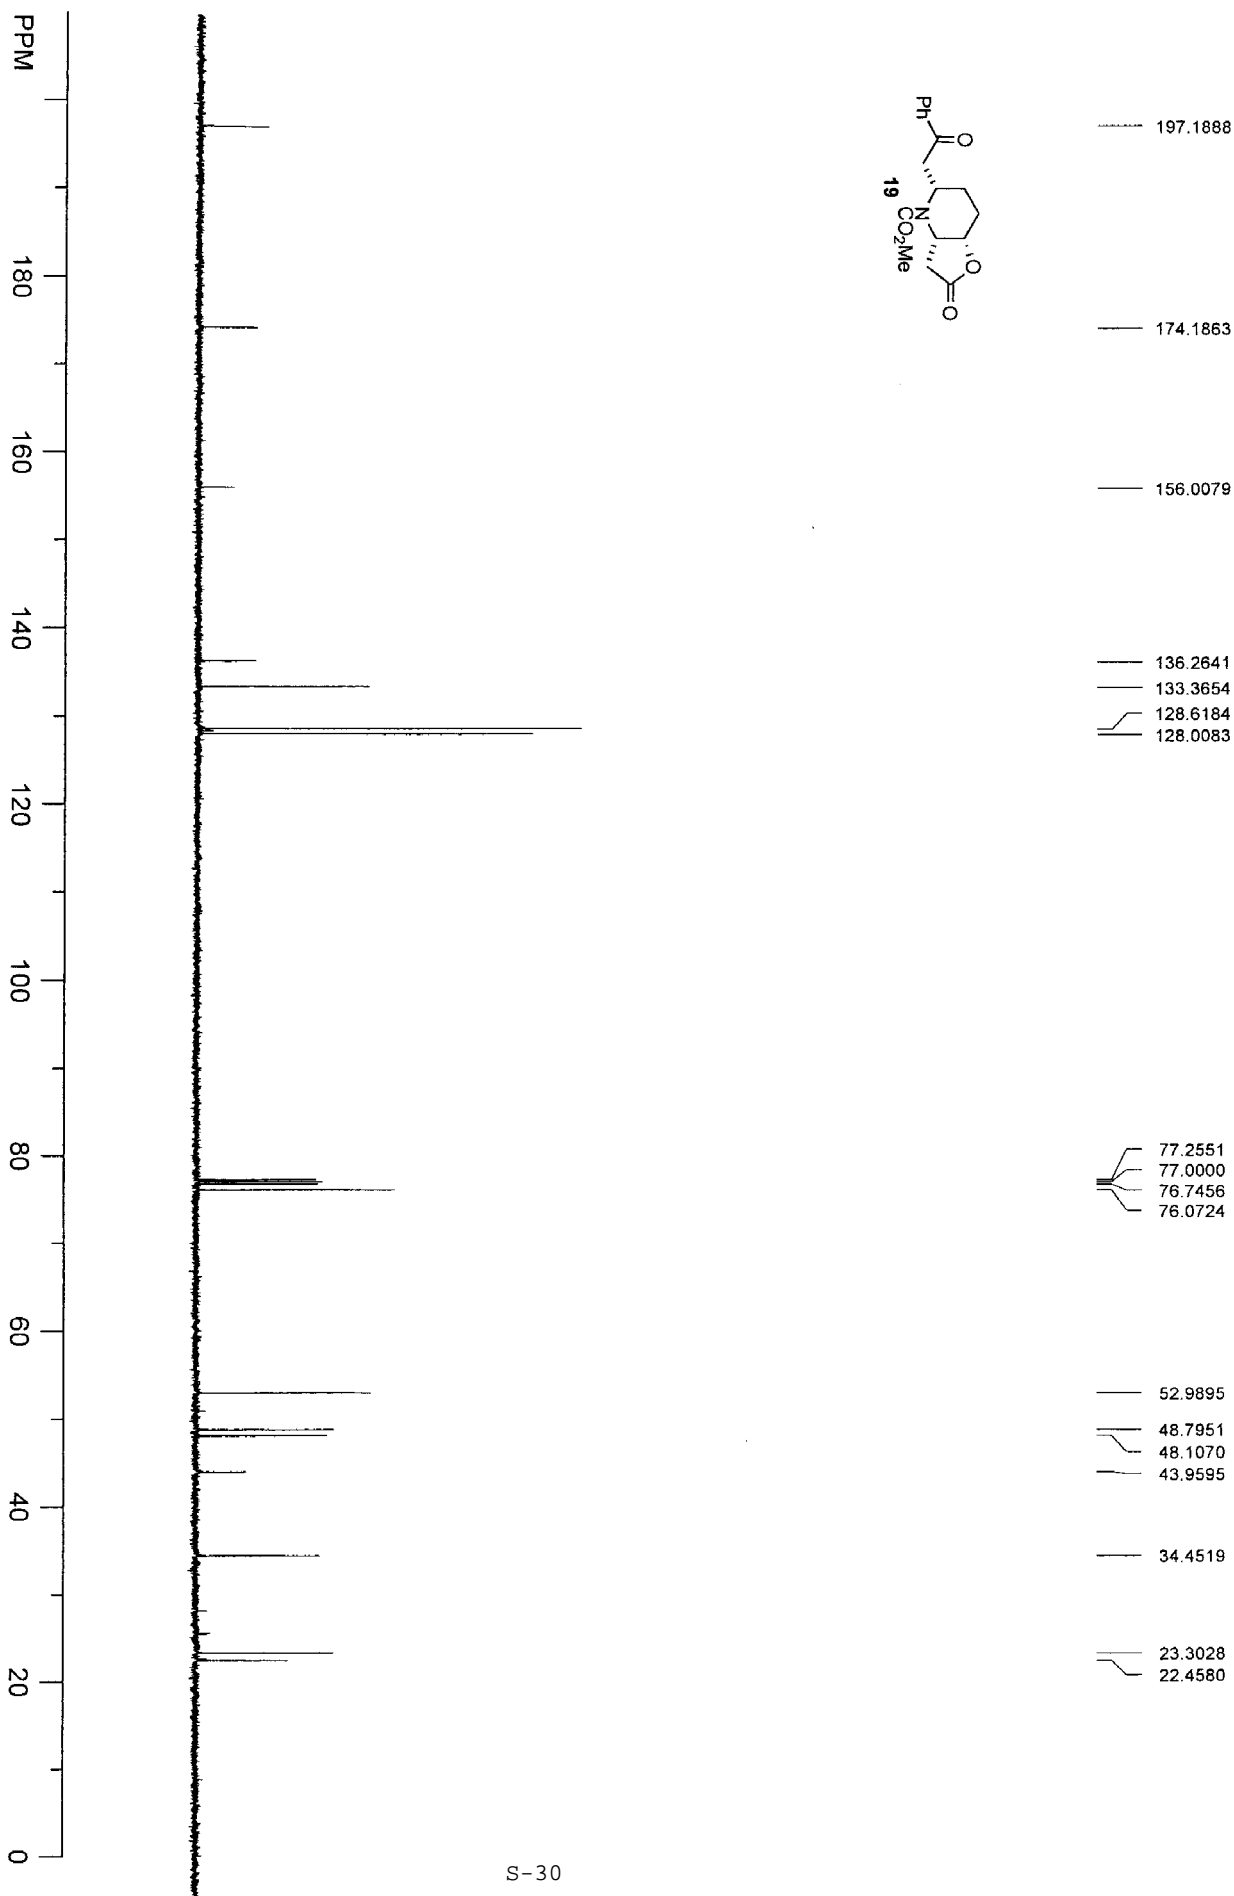

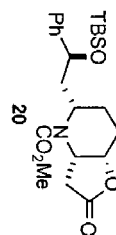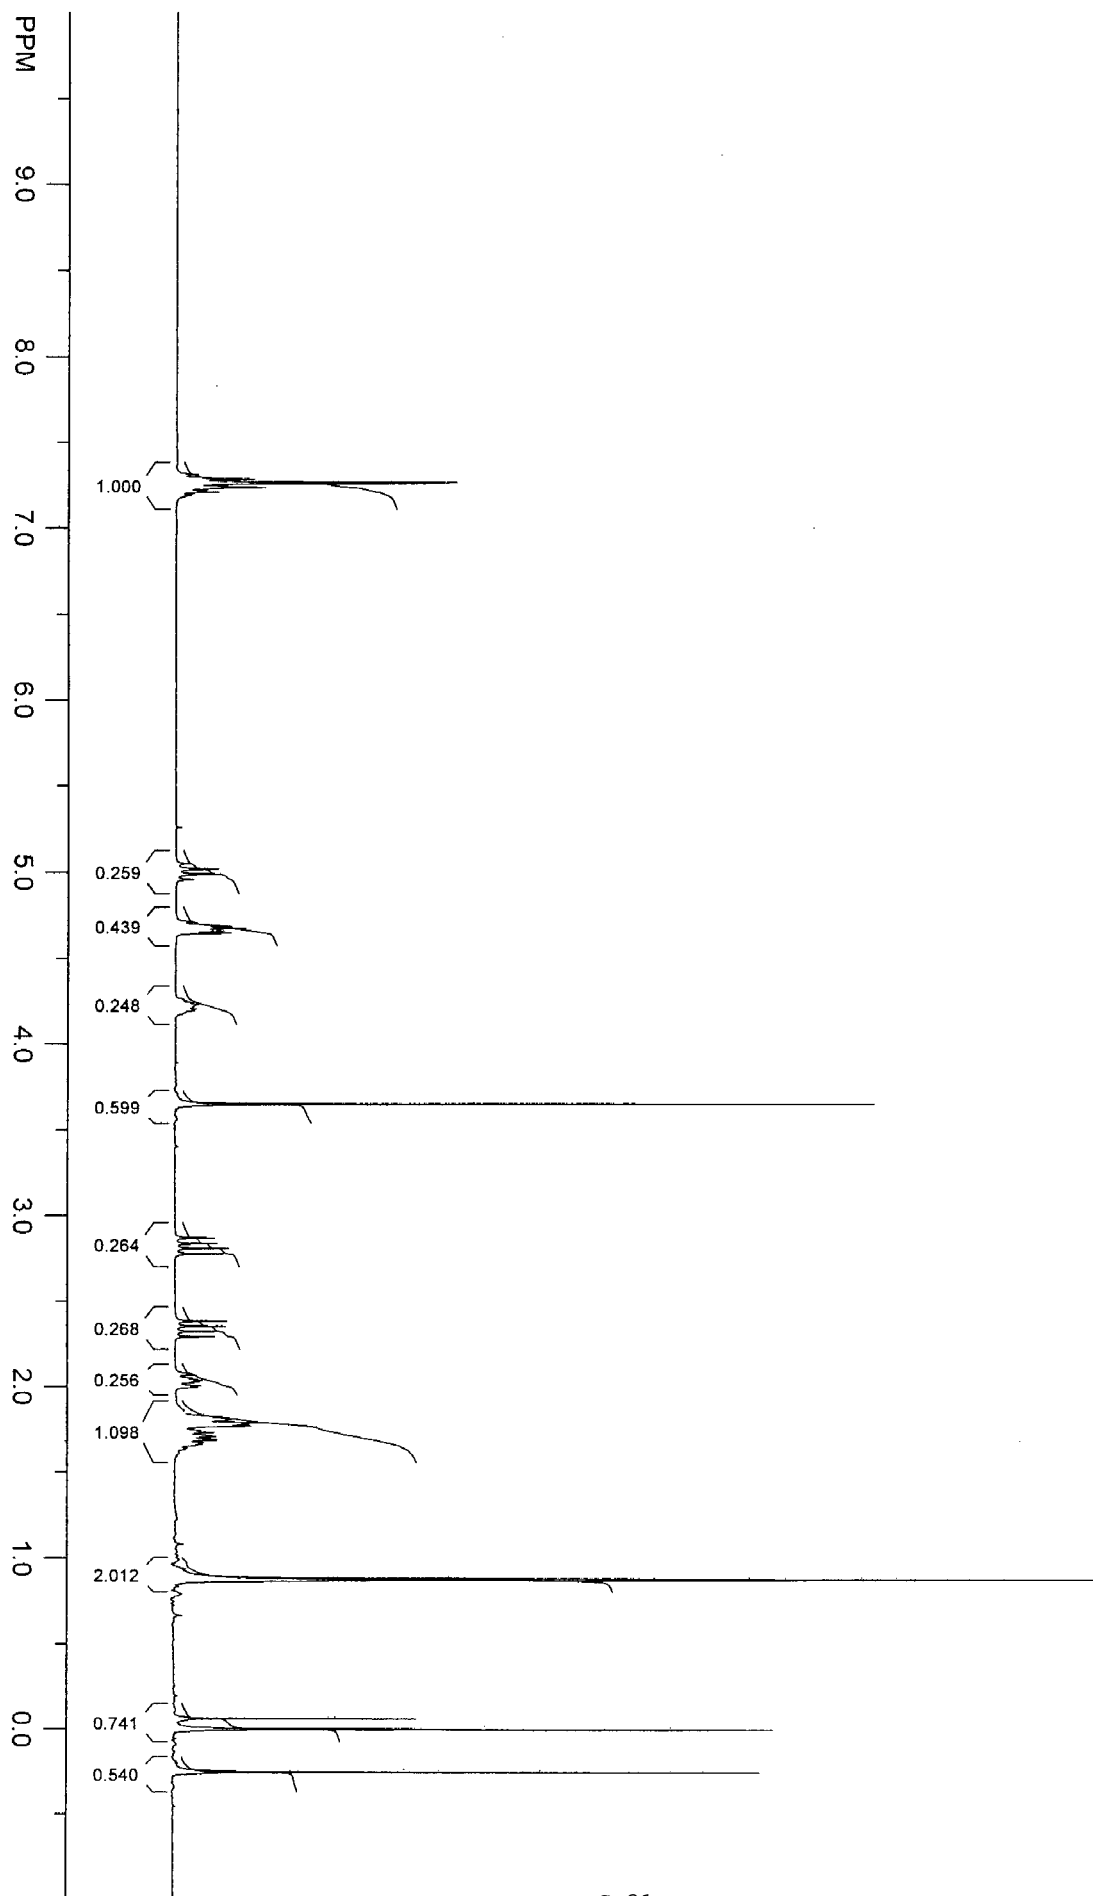

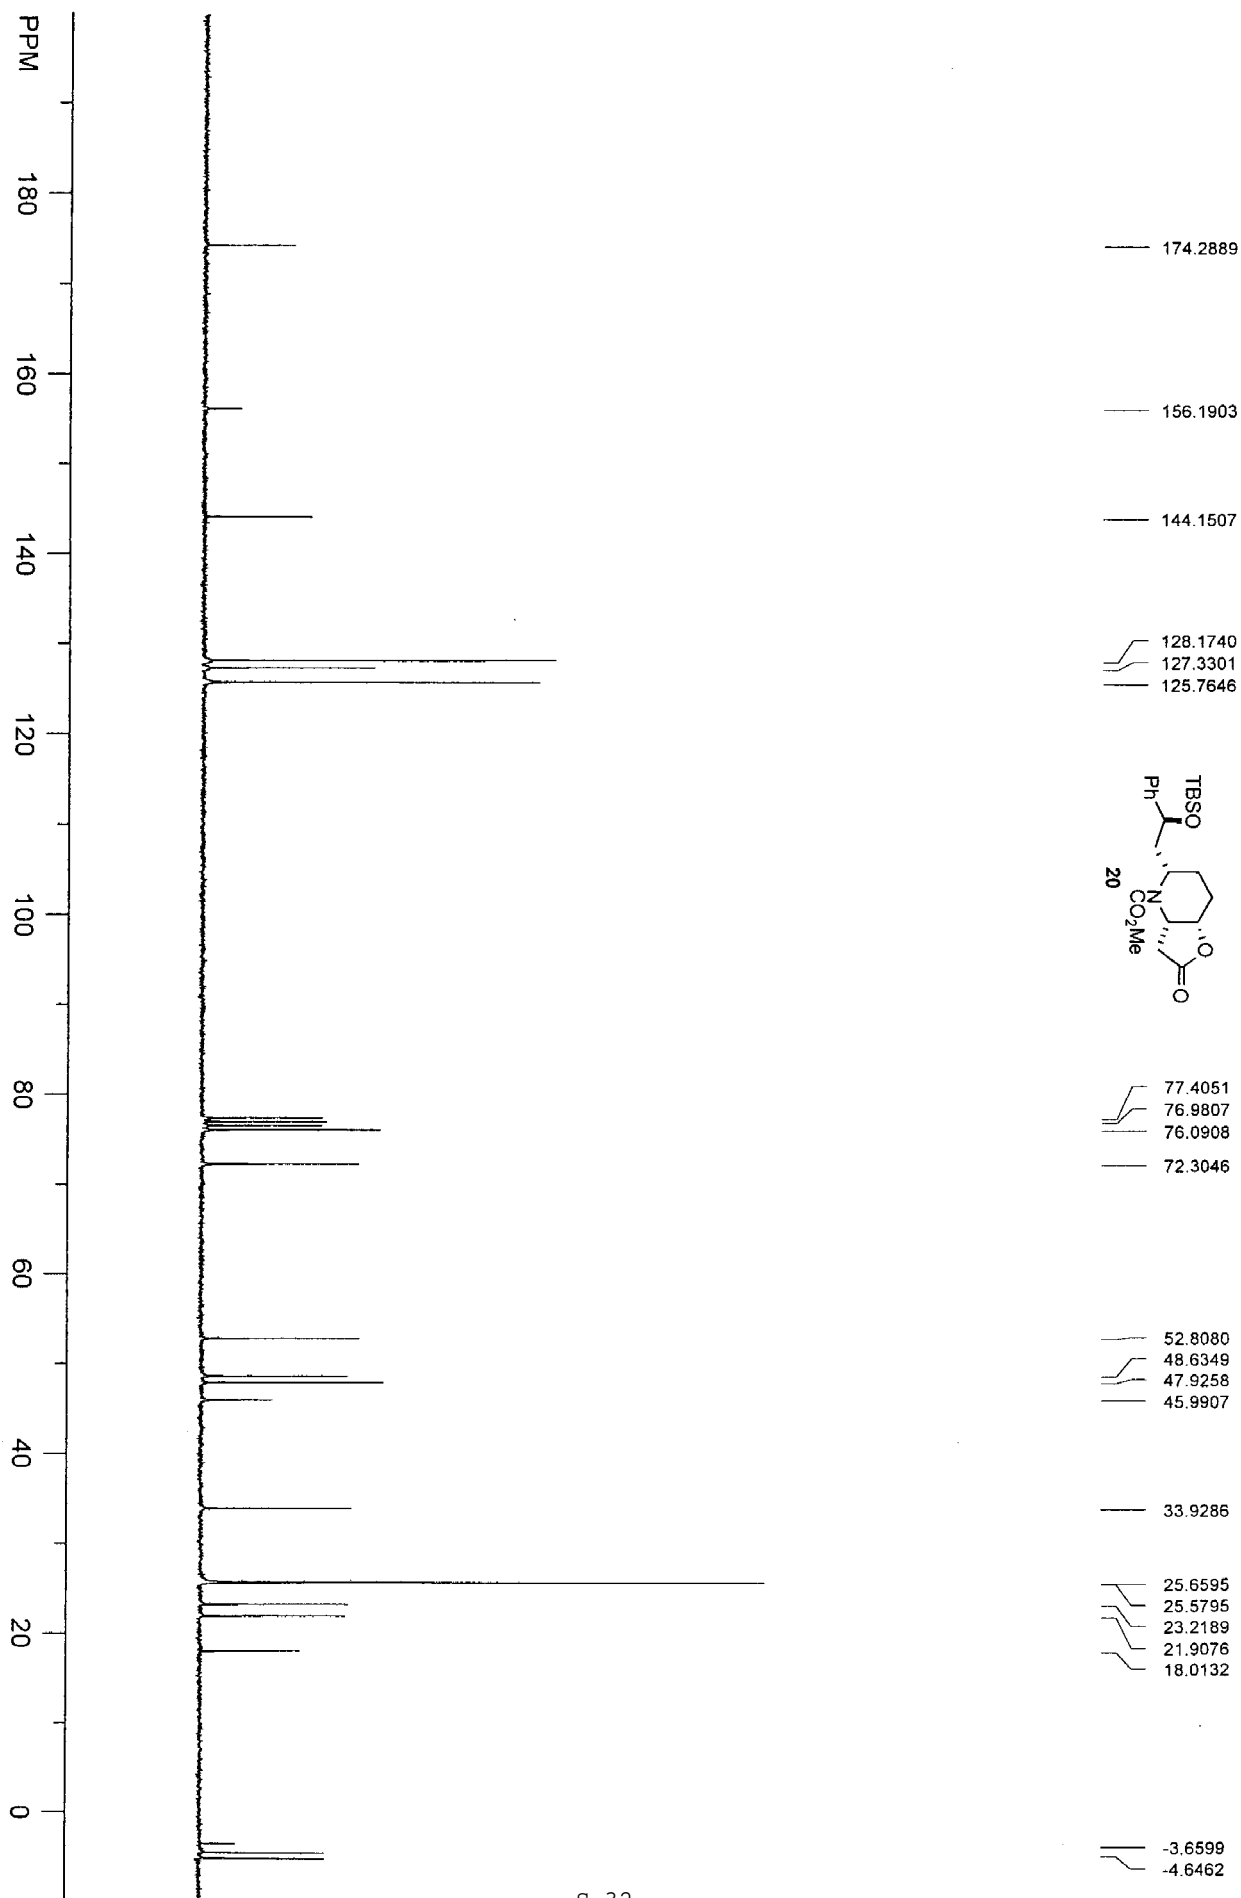



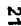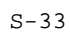

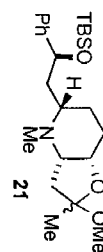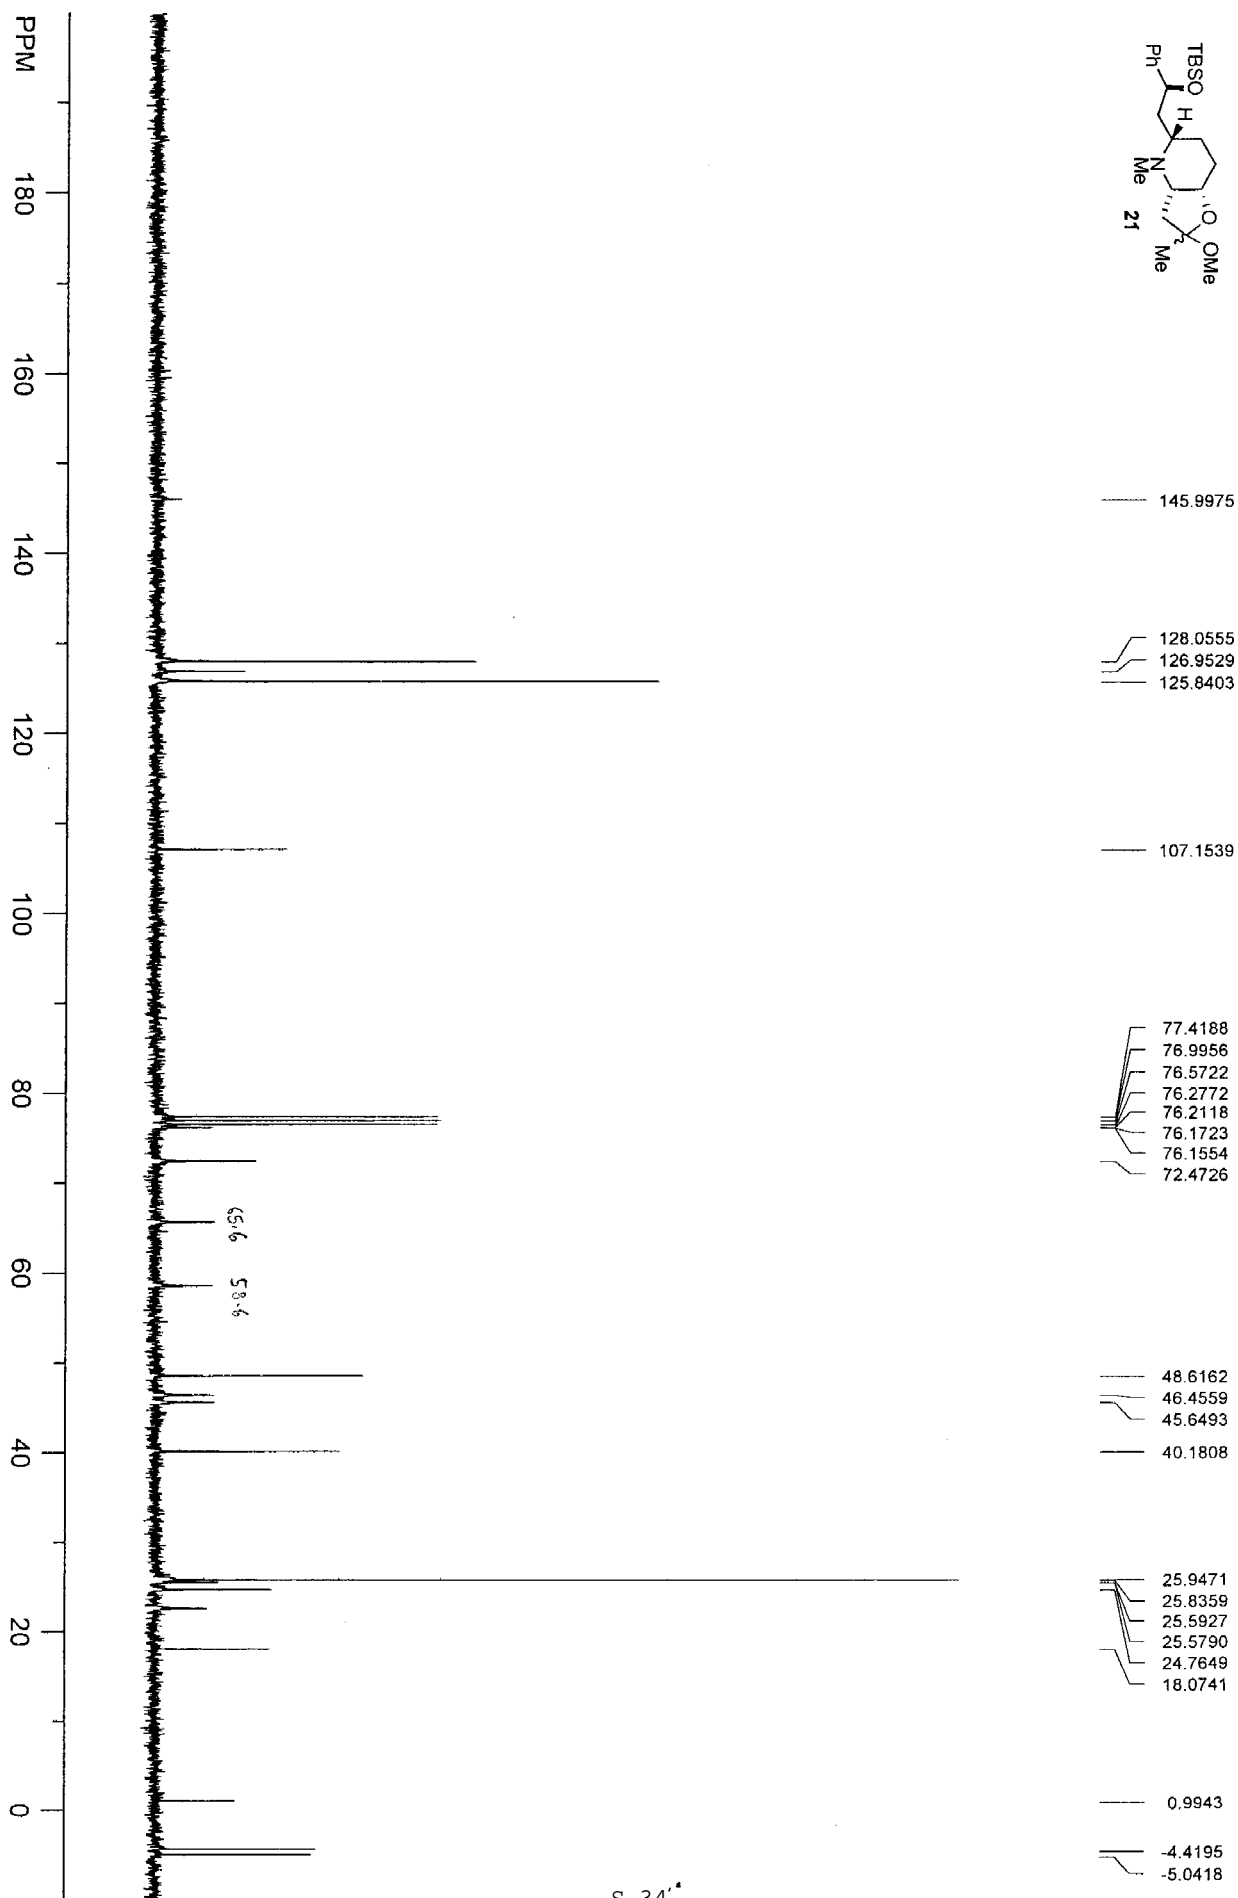

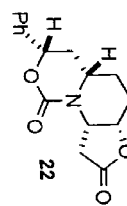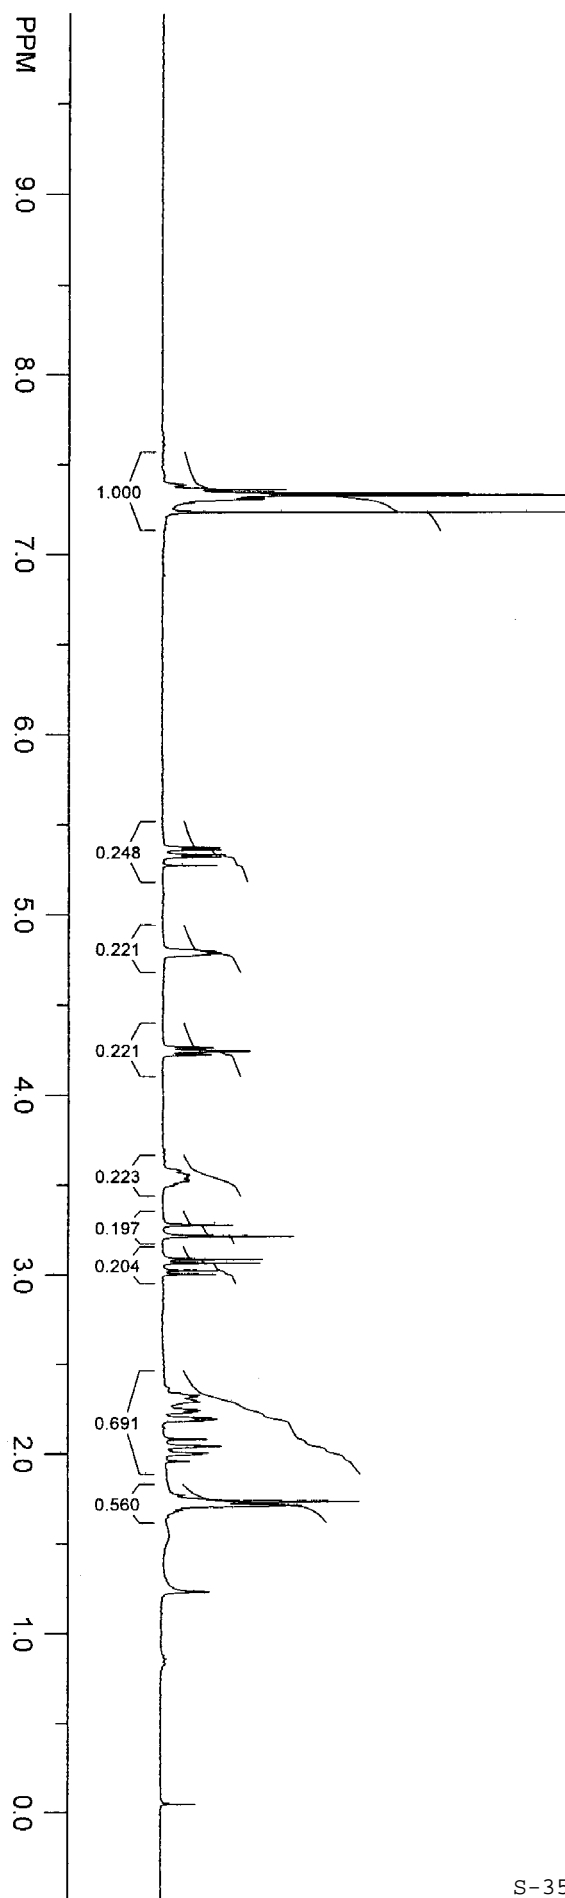

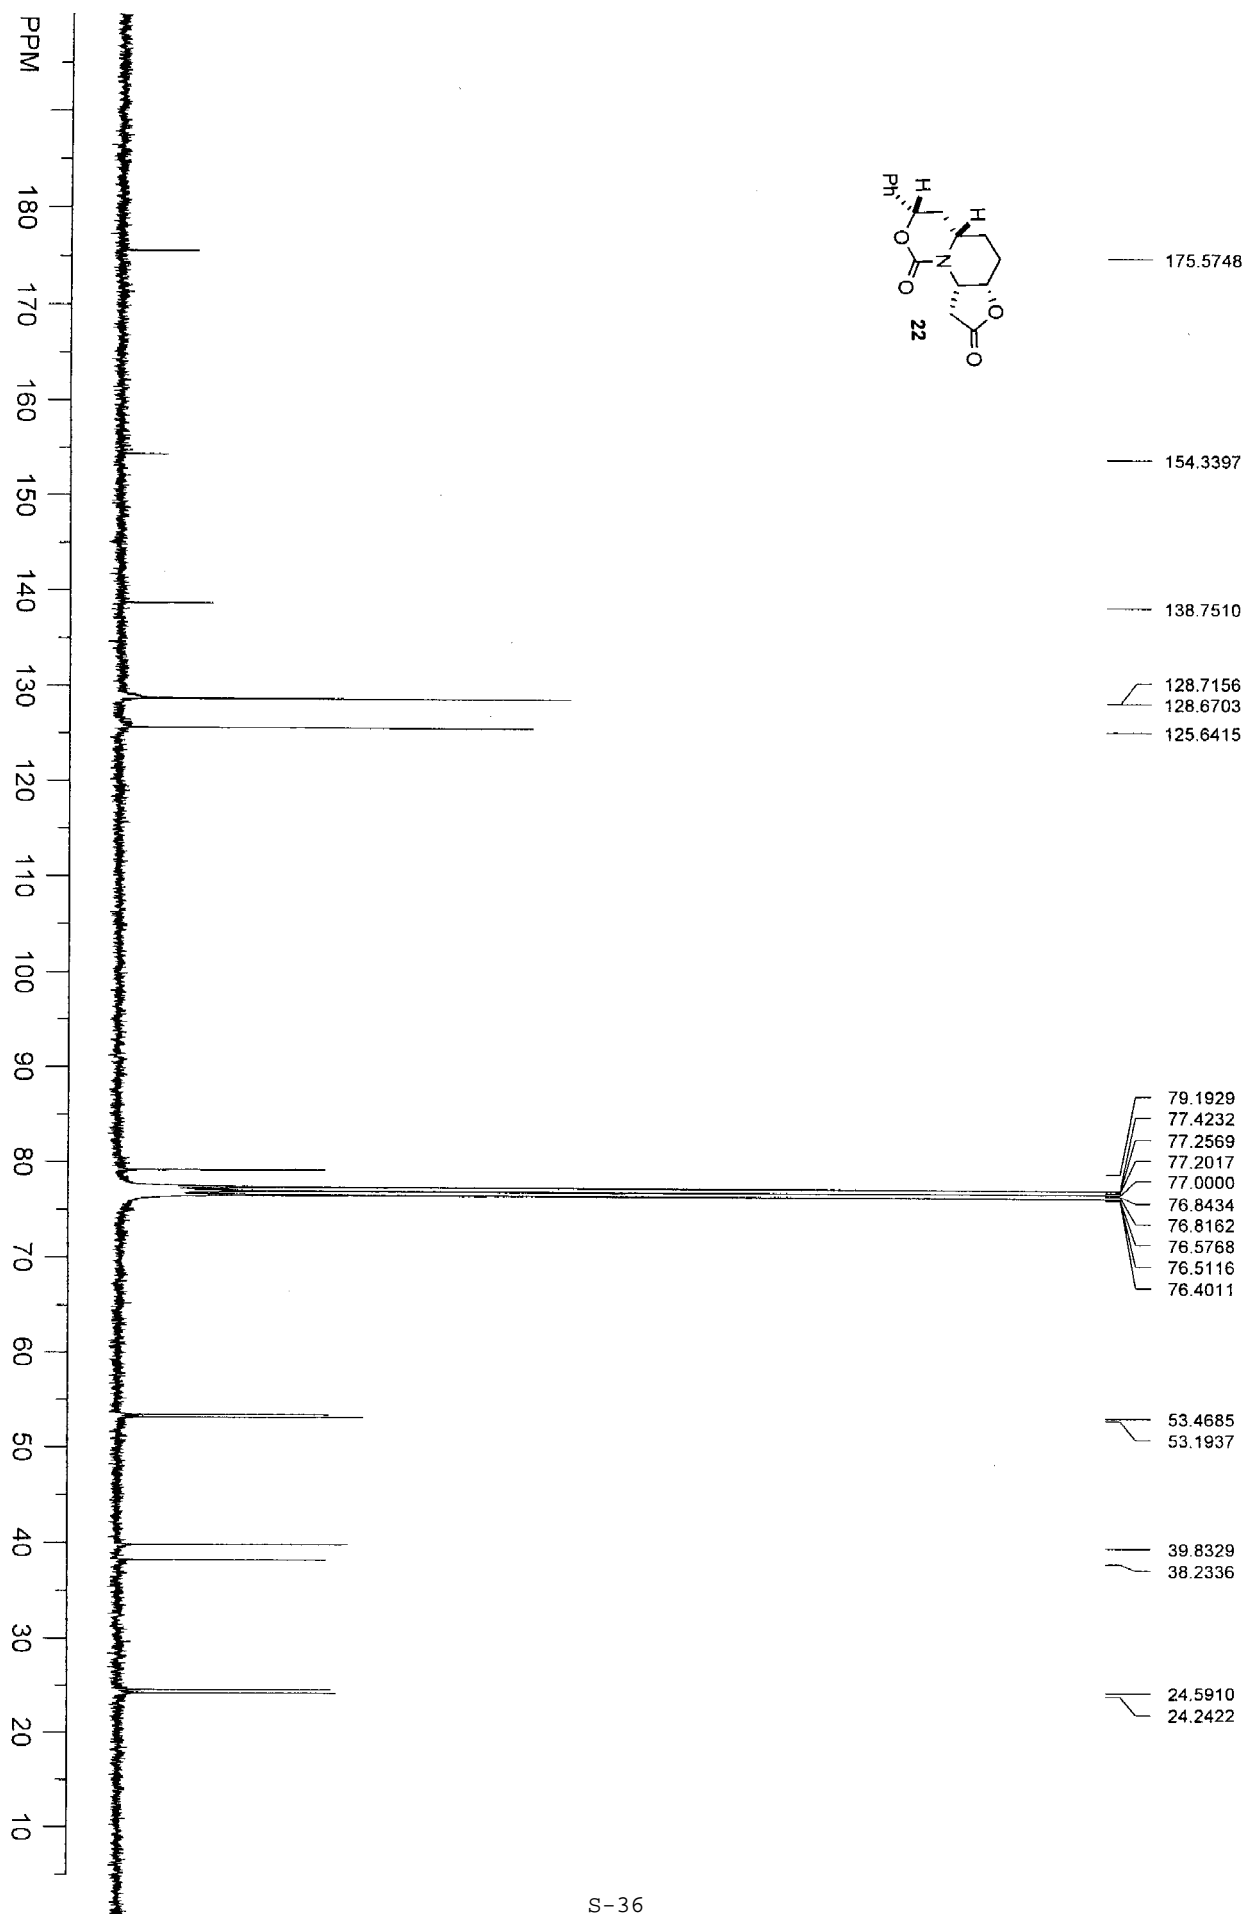

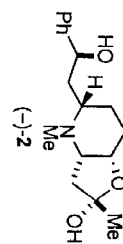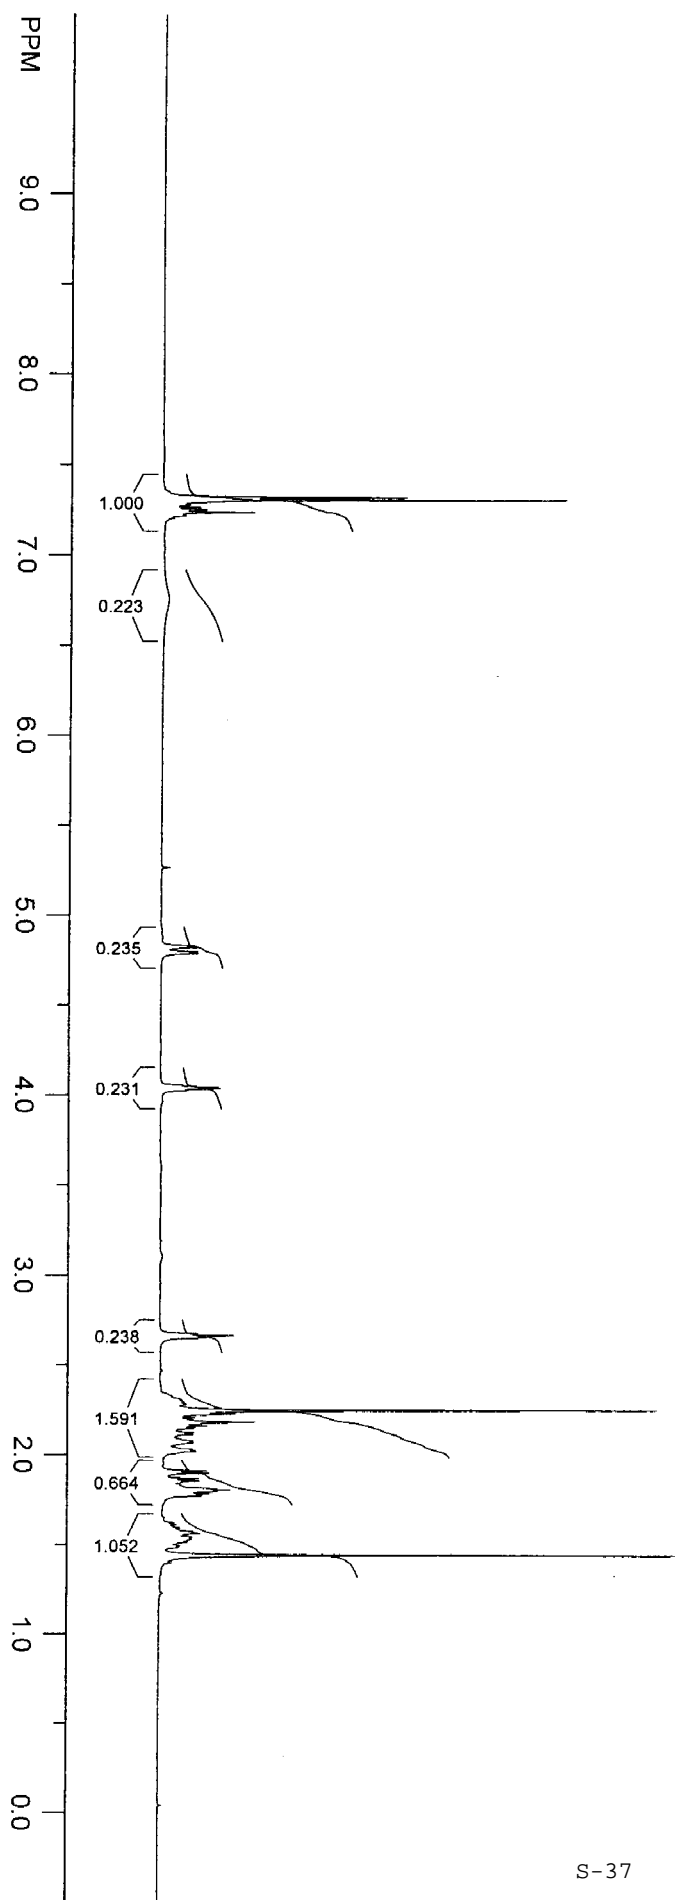

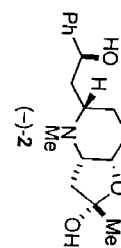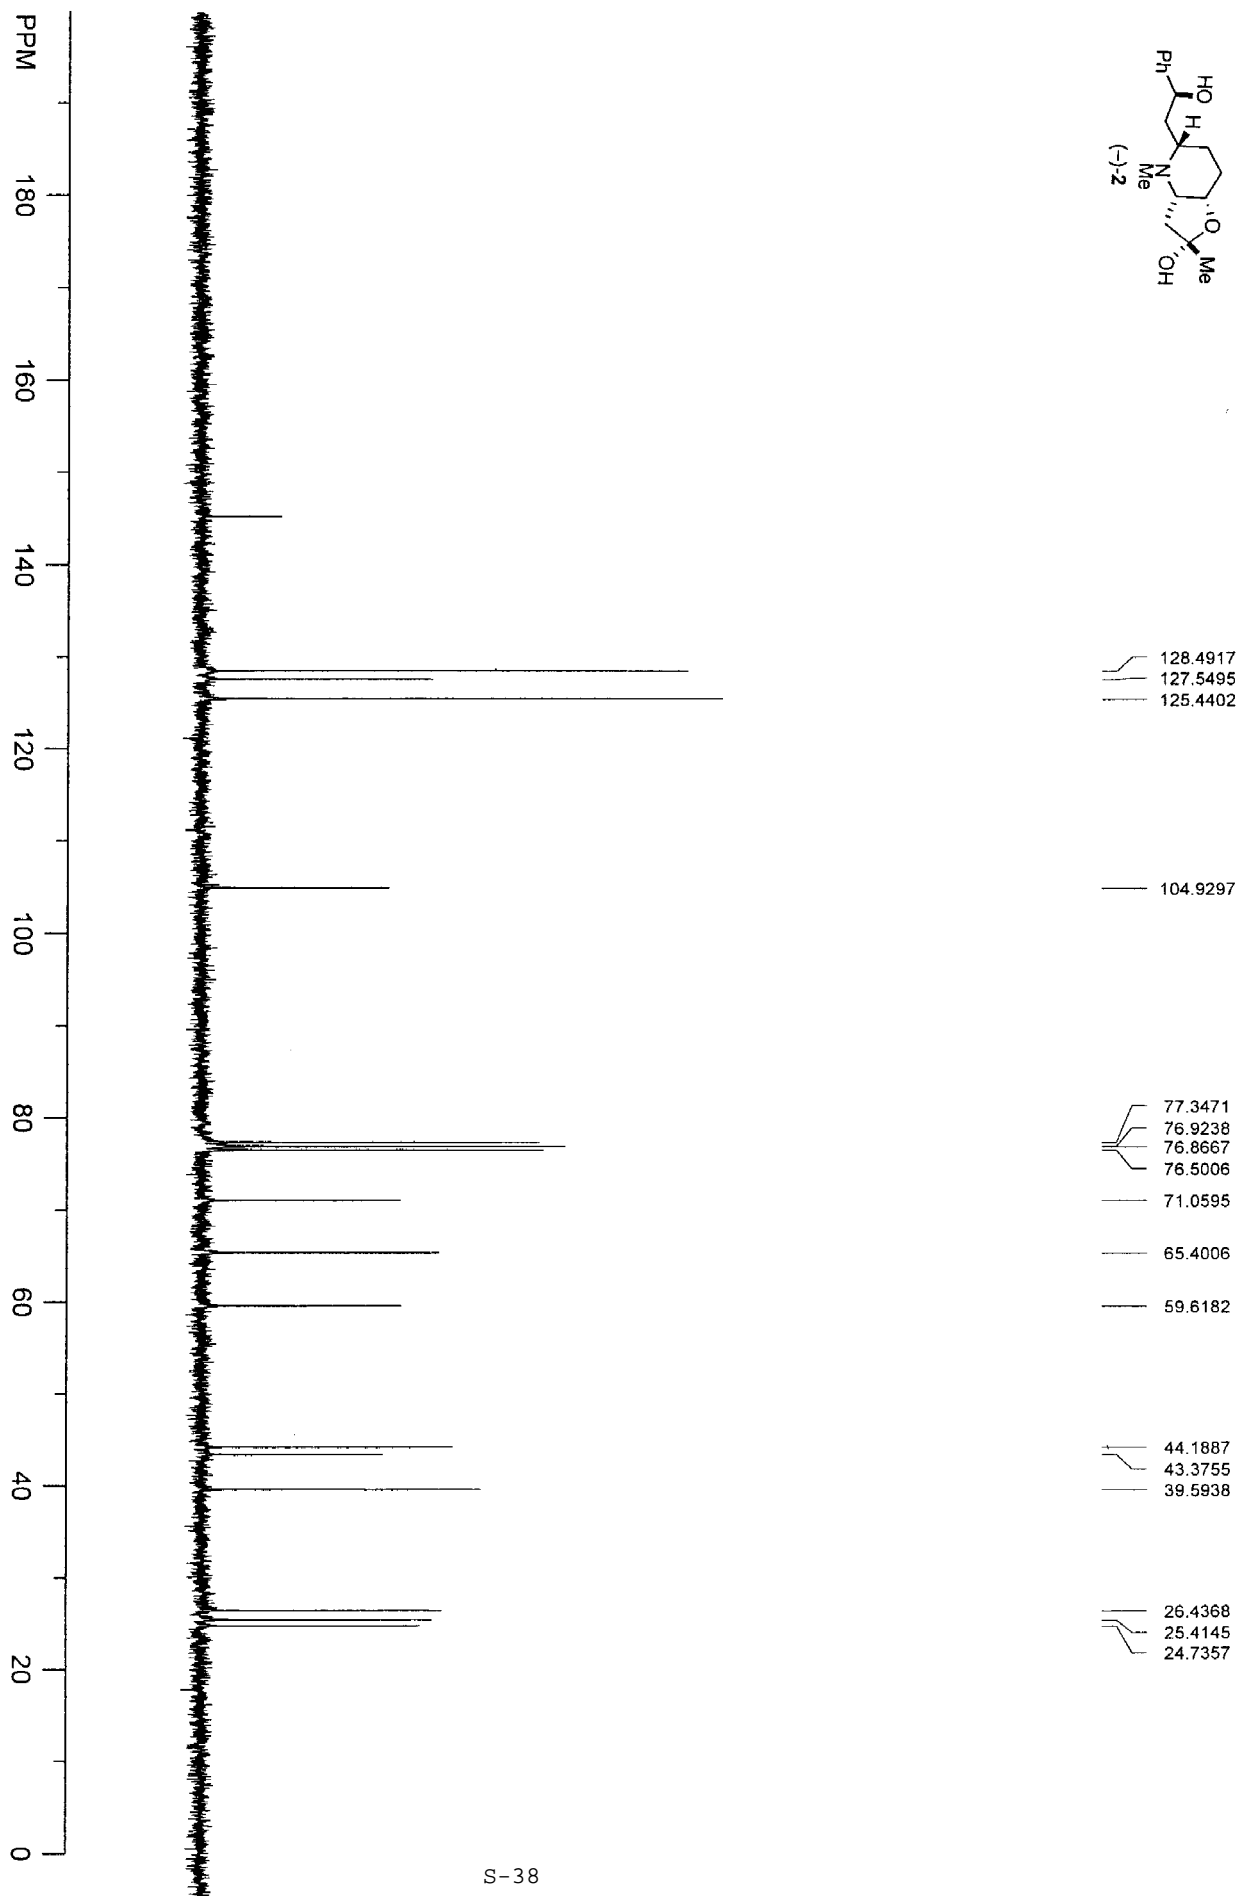

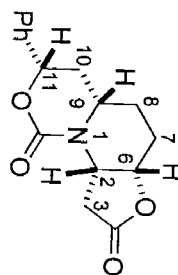

**22** (numbering is arbitrary)  
1D NOESY Experiment

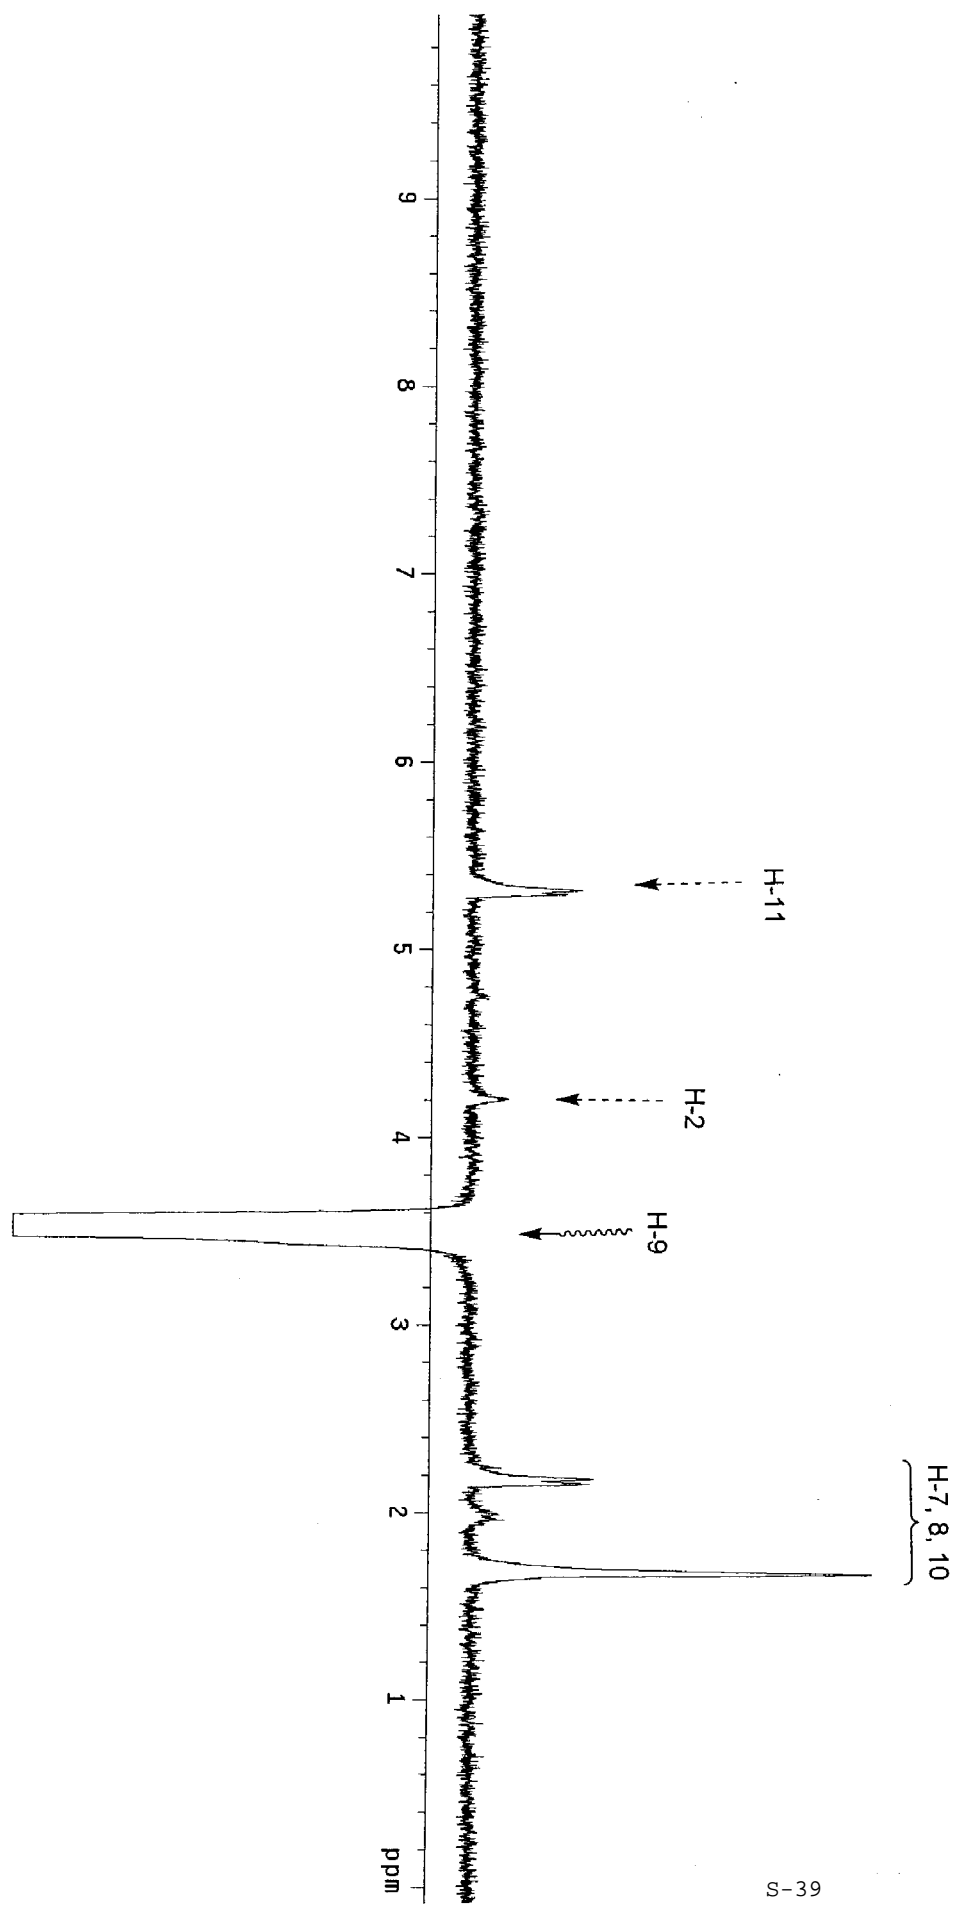

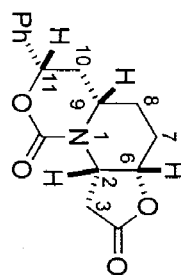

**22** (numbering is arbitrary)  
1D NOESY Experiment

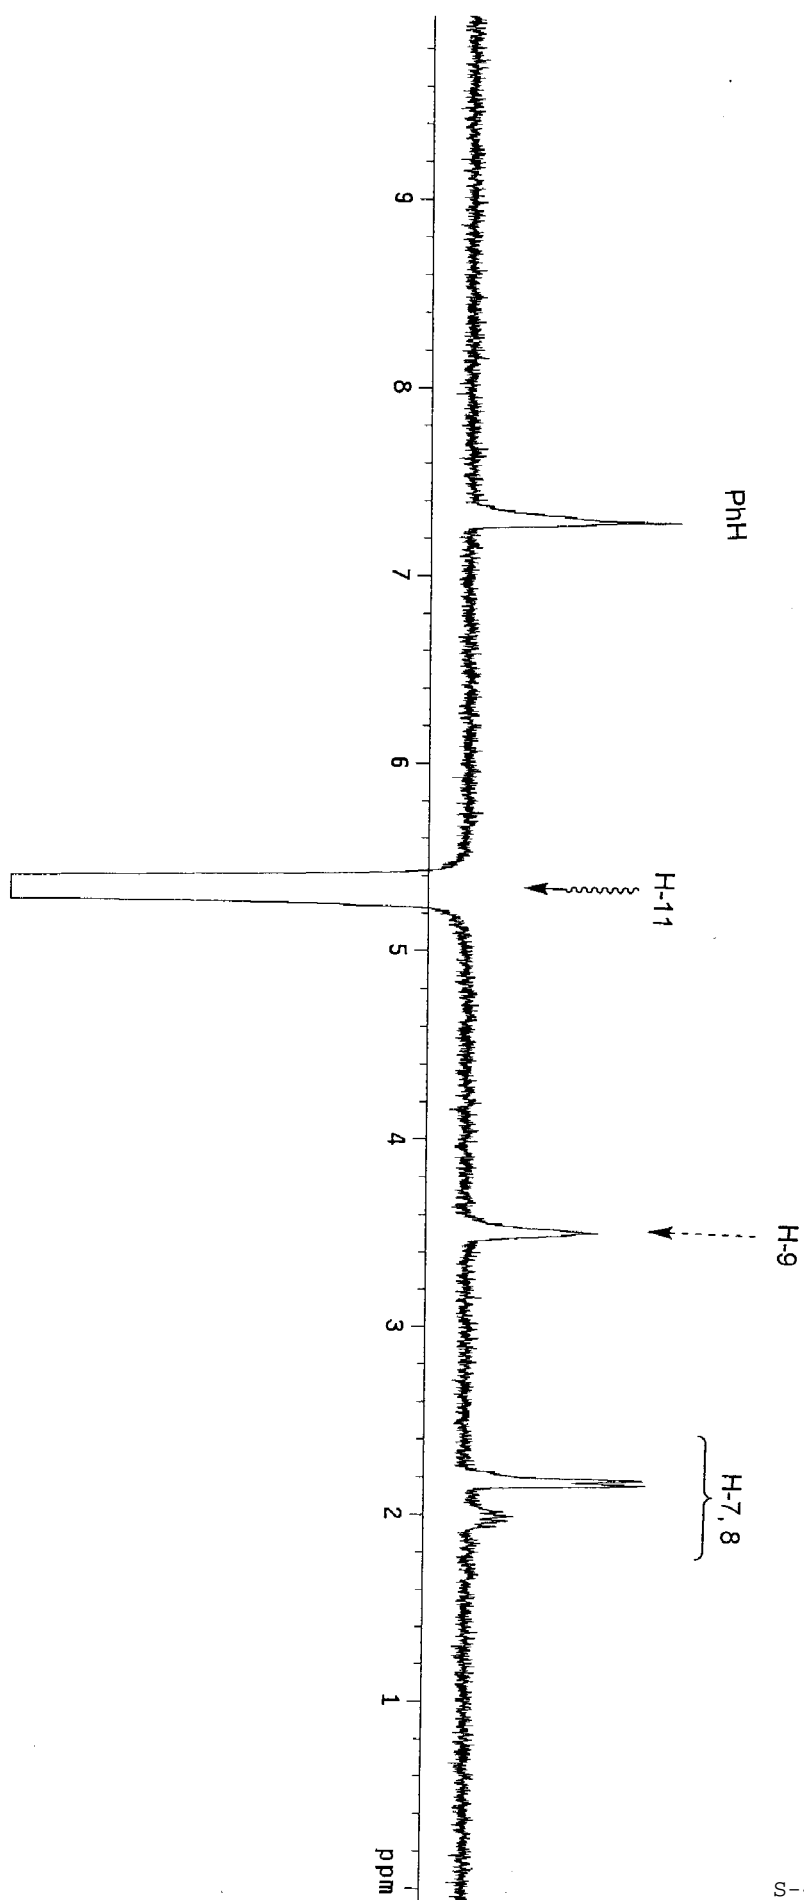



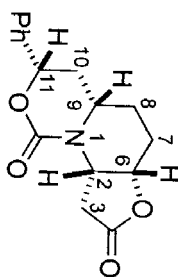

**22** (numbering is arbitrary)  
1D NOESY Experiment

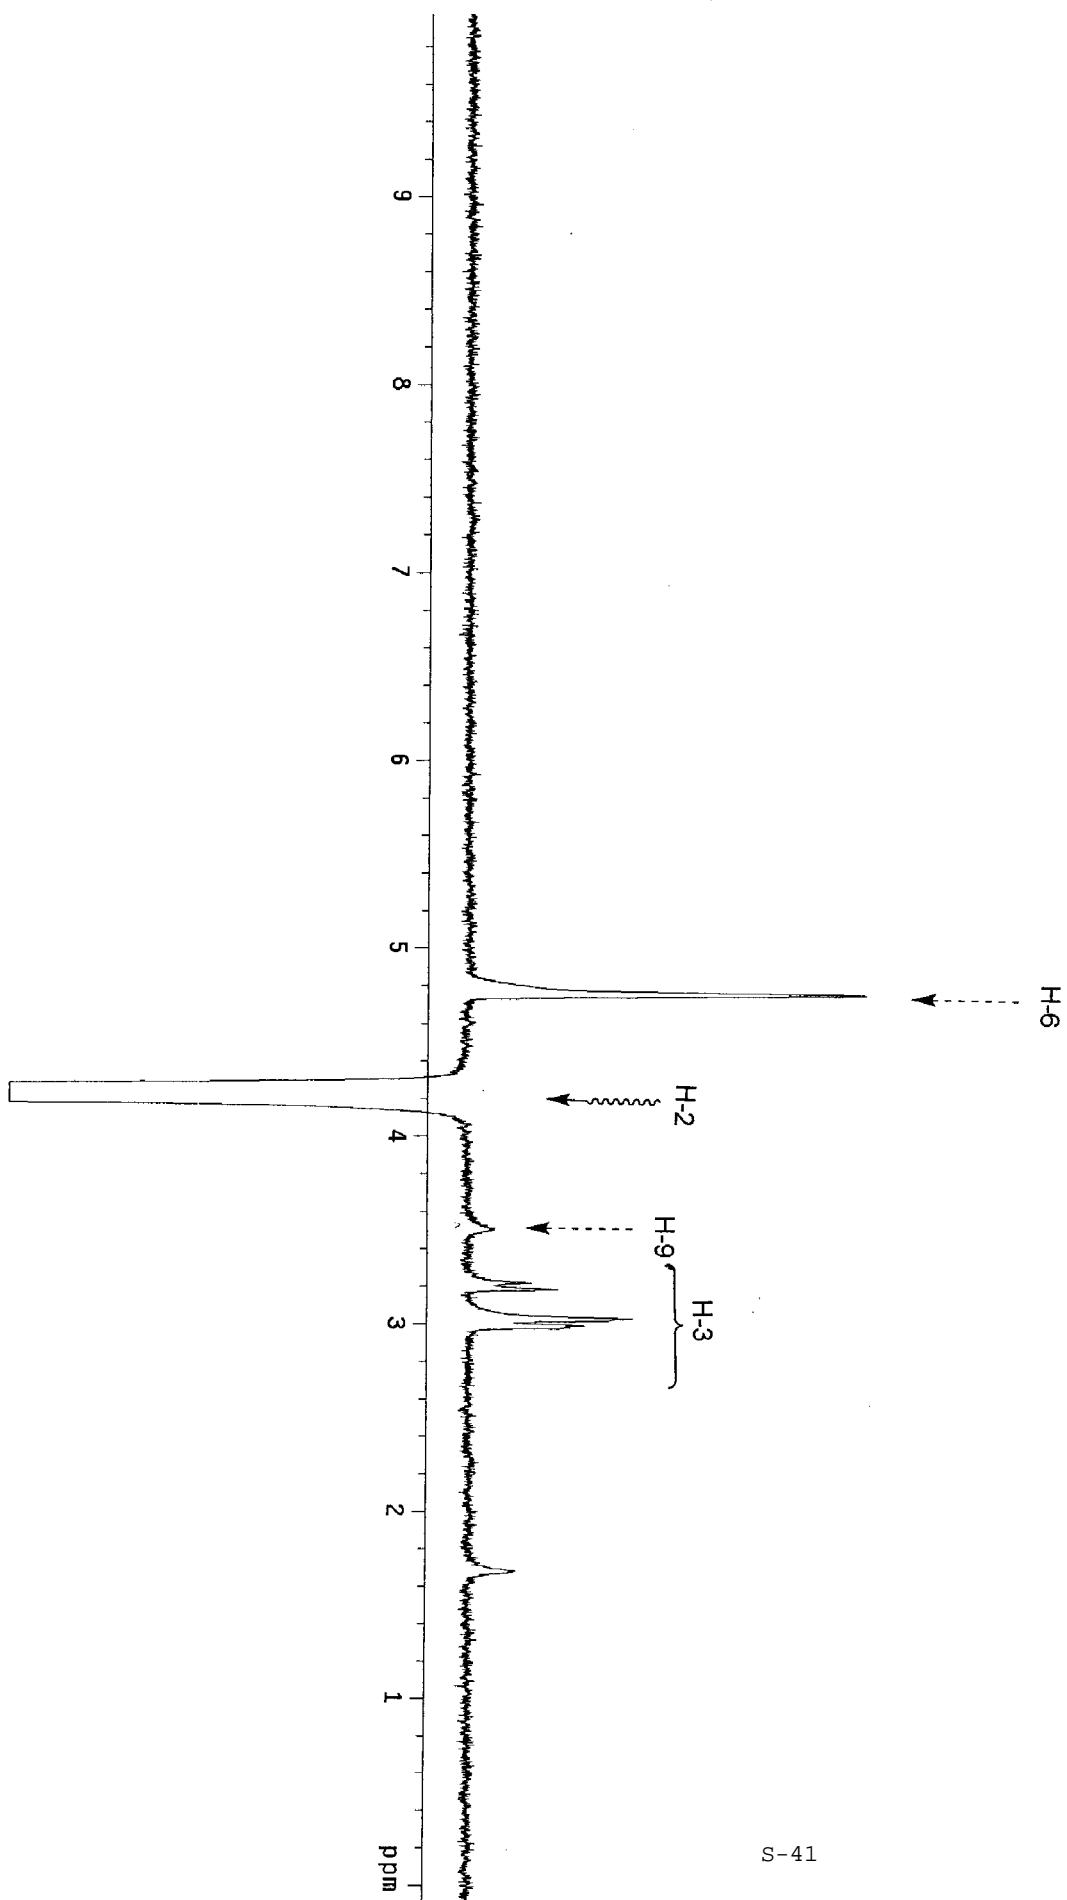

Supplement: Supplementary file 1 [file 4614880]
